# Supplementary material for: Facile formation of tetrazole–thiolato Pd(ii) and Pt(ii) complexes through deprotonation or oxidative addition using organic tetrazole–thiones
Source: Royal Society of Chemistry journal article supplement (doi:10.1039/d4nj01429d), 2024-01-01

## *Electronic Supplementary Information (ESI)*

### **Facile formation of tetrazole-thiolato Pd(II) and -Pt(II) complexes through deprotonation or oxidative addition using organic tetrazole-thiones**

Hyoungh Soon Kwon<sup>1</sup>, Geon Hyeong Park<sup>1</sup>, Huiyeong Ju<sup>2</sup>, Eunji Lee<sup>1</sup>, Yong-Joo Kim<sup>\*1</sup>

<sup>1</sup>*Department of Chemistry, Gangneung-Wonju National University, Gangneung 25457, Korea*

<sup>2</sup>*Western Seoul Center, Korea Basic Science Institute, Seoul 03759, Korea*

#### **Contents**

**Table - SM1.** X-ray data collection and structure refinements.

**Figure S1.** <sup>1</sup>H NMR spectrum of **1** (400 MHz, CDCl<sub>3</sub>, 300 K)

**Figure S2.** <sup>13</sup>C NMR spectrum of **1** (101 MHz, CDCl<sub>3</sub>, 300 K)

**Figure S3.** <sup>31</sup>P NMR spectrum of **1** (162 MHz, CDCl<sub>3</sub>, 300 K)

**Figure S4.** <sup>1</sup>H NMR spectrum of **2** (400 MHz, CDCl<sub>3</sub>, 300 K)

**Figure S5.** <sup>13</sup>C NMR spectrum of **2** (101 MHz, CDCl<sub>3</sub>, 300 K)

**Figure S6.** <sup>31</sup>P NMR spectrum of **2** (162 MHz, CDCl<sub>3</sub>, 300 K)

**Figure S7.** <sup>1</sup>H NMR spectrum of **3** (300 MHz, CDCl<sub>3</sub>, 300 K)

**Figure S8.** <sup>13</sup>C NMR spectrum of **3** (75 MHz, CDCl<sub>3</sub>, 300 K)

**Figure S9.** <sup>31</sup>P NMR spectrum of **3** (122 MHz, CDCl<sub>3</sub>, 300 K)

**Figure S10.** <sup>1</sup>H NMR spectrum of **4** (600 MHz, CDCl<sub>3</sub>, 300 K)

**Figure S11.** <sup>13</sup>C NMR spectrum of **4** (151 MHz, CDCl<sub>3</sub>, 300 K)

**Figure S12.** <sup>31</sup>P NMR spectrum of **4** (243 MHz, CDCl<sub>3</sub>, 300 K)

**Figure S13.** <sup>1</sup>H NMR spectrum of **5** (400 MHz, CDCl<sub>3</sub>, 300 K)

**Figure S14.** <sup>13</sup>C NMR spectrum of **5** (101 MHz, CDCl<sub>3</sub>, 300 K)

**Figure S15.** <sup>31</sup>P NMR spectrum of **5** (162 MHz, CDCl<sub>3</sub>, 300 K)

**Figure S16.** <sup>1</sup>H NMR spectrum of **6** (400 MHz, CDCl<sub>3</sub>, 300 K)

**Figure S17.** <sup>13</sup>C NMR spectrum of **6** (101 MHz, CDCl<sub>3</sub>, 300 K)

**Figure S18.** <sup>31</sup>P NMR spectrum of **6** (162 MHz, CDCl<sub>3</sub>, 300 K)

**Figure S19.** <sup>1</sup>H NMR spectrum of **7** (300 MHz, CDCl<sub>3</sub>, 300 K)

**Figure S20.** <sup>13</sup>C NMR spectrum of **7** (75 MHz, CDCl<sub>3</sub>, 300 K)

**Figure S21.**  $^{31}\text{P}$  NMR spectrum of **7** (122 MHz,  $\text{CDCl}_3$ , 300 K)

**Figure S22.**  $^1\text{H}$  NMR spectrum of **8** (600 MHz,  $\text{CDCl}_3$ , 300 K)

**Figure S23.**  $^{13}\text{C}$  NMR spectrum of **8** (151 MHz,  $\text{CDCl}_3$ , 300 K)

**Figure S24.**  $^{31}\text{P}$  NMR spectrum of **8** (243 MHz,  $\text{CDCl}_3$ , 300 K)

**Figure S25.**  $^1\text{H}$  NMR spectrum of **9** (600 MHz,  $\text{CDCl}_3$ , 300 K)

**Figure S26.**  $^{31}\text{P}$  NMR spectrum of **9** (243 MHz,  $\text{CDCl}_3$ , 300 K)

**Figure S27.**  $^1\text{H}$  NMR spectrum of **10** (600 MHz,  $\text{CDCl}_3$ , 300 K)

**Figure S28.**  $^{13}\text{C}$  NMR spectrum of **10** (151 MHz,  $\text{CDCl}_3$ , 300 K)

**Figure S29.**  $^{31}\text{P}$  NMR spectrum of **10** (243 MHz,  $\text{CDCl}_3$ , 300 K)

**Figure S30.**  $^1\text{H}$  NMR spectrum of **11** (400 MHz,  $\text{CDCl}_3$ , 300 K)

**Figure S31.**  $^{13}\text{C}$  NMR spectrum of **11** (101 MHz,  $\text{CDCl}_3$ , 300 K)

**Figure S32.**  $^{31}\text{P}$  NMR spectrum of **11** (162 MHz,  $\text{CDCl}_3$ , 300 K)

**Figure S33.**  $^1\text{H}$  NMR spectrum of **12** (400 MHz,  $\text{CDCl}_3$ , 300 K)

**Figure S34.**  $^{13}\text{C}$  NMR spectrum of **12** (101 MHz,  $\text{CDCl}_3$ , 300 K)

**Figure S35.**  $^{31}\text{P}$  NMR spectrum of **12** (162 MHz,  $\text{CDCl}_3$ , 300 K)

**Figure S36.**  $^1\text{H}$  NMR spectrum of **13** (600 MHz,  $\text{CDCl}_3$ , 300 K)

**Figure S37.**  $^{13}\text{C}$  NMR spectrum of **13** (151 MHz,  $\text{CDCl}_3$ , 300 K)

**Figure S38.**  $^{31}\text{P}$  NMR spectrum of **13** (243 MHz,  $\text{CDCl}_3$ , 300 K)

**Figure S39.**  $^1\text{H}$  NMR spectrum of **14** (600 MHz,  $\text{CDCl}_3$ , 300 K)

**Figure S40.**  $^{13}\text{C}$  NMR spectrum of **14** (151 MHz,  $\text{CDCl}_3$ , 300 K)

**Figure S41.**  $^{31}\text{P}$  NMR spectrum of **14** (243 MHz,  $\text{CDCl}_3$ , 300 K)

**Figure S42.**  $^1\text{H}$  NMR spectrum of **15** (600 MHz,  $\text{CDCl}_3$ , 300 K)

**Figure S43.**  $^{13}\text{C}$  NMR spectrum of **15** (151 MHz,  $\text{CDCl}_3$ , 300 K)

**Figure S44.**  $^{31}\text{P}$  NMR spectrum of **15** (243 MHz,  $\text{CDCl}_3$ , 300 K)

**Figure S45.**  $^1\text{H}$  NMR spectrum of **16** (400 MHz,  $\text{CDCl}_3$ , 300 K)

**Figure S46.**  $^1\text{H}$  NMR spectrum of **16** (101 MHz,  $\text{CDCl}_3$ , 300 K)

**Figure S47.**  $^{31}\text{P}$  NMR spectrum of **16** (162 MHz,  $\text{CDCl}_3$ , 300 K)

**Figure S48.**  $^1\text{H}$  NMR spectrum of **17** (400 MHz,  $\text{CDCl}_3$ , 300 K)

**Figure S49.**  $^{13}\text{C}$  NMR spectrum of **17** (101 MHz,  $\text{CDCl}_3$ , 300 K)

**Figure S50.**  $^{31}\text{P}$  NMR spectrum of **17** (162 MHz,  $\text{CDCl}_3$ , 300 K)

**Figure S51.**  $^1\text{H}$  NMR spectrum of **18** (400 MHz,  $\text{CDCl}_3$ , 300 K)

**Figure S52.**  $^{13}\text{C}$  NMR spectrum of **18** (101 MHz,  $\text{CDCl}_3$ , 300 K)

**Figure S53.**  $^{31}\text{P}$  NMR spectrum of **18** (162 MHz,  $\text{CDCl}_3$ , 300 K)

**Figure S54.**  $^1\text{H}$  NMR spectrum of **18**, **19 Mix** (400 MHz,  $\text{CDCl}_3$ , 300 K)

**Figure S55.**  $^{31}\text{P}$  NMR spectrum of **18**, **19 Mix** (162 MHz,  $\text{CDCl}_3$ , 300 K)

**Figure S56.**  $^1\text{H}\{^{31}\text{P}\}$  NMR spectrum of **18** (400 MHz,  $\text{CDCl}_3$ , 300 K)

**Figure S57.**  $^1\text{H}$  NMR spectrum of **20**, **21 Mix** (400 MHz,  $\text{CDCl}_3$ , 300 K)

**Figure S58.**  $^{13}\text{C}$  NMR spectrum of **20**, **21 Mix** (101 MHz,  $\text{CDCl}_3$ , 300 K)

**Figure S59.**  $^{31}\text{P}$  NMR spectrum of **20**, **21 Mix** (162 MHz,  $\text{CDCl}_3$ , 300 K)

**Figure S60.**  $^1\text{H}$  NMR spectrum of **22** (400 MHz,  $\text{CDCl}_3$ , 300 K)

**Figure S61.**  $^{13}\text{C}$  NMR spectrum of **22** (101 MHz,  $\text{CDCl}_3$ , 300 K)

**Figure S62.**  $^1\text{H}$  NMR spectrum of **23** (400 MHz,  $\text{CDCl}_3$ , 300 K)

**Figure S63.**  $^{13}\text{C}$  NMR spectrum of **23** (101 MHz,  $\text{CDCl}_3$ , 300 K)

**Figure S64.**  $^{31}\text{P}$  NMR spectrum of **23** (162 MHz,  $\text{CDCl}_3$ , 300 K)

**Figure S65.**  $^1\text{H}$  NMR spectrum of **24** (400 MHz,  $\text{CDCl}_3$ , 300 K)

**Figure S66.**  $^{13}\text{C}$  NMR spectrum of **24** (151 MHz,  $\text{CDCl}_3$ , 300 K)

**Figure S67.**  $^{31}\text{P}$  NMR spectrum of **24** (162 MHz,  $\text{CDCl}_3$ , 300 K)

**Figure S68.**  $^1\text{H}$  NMR spectrum of **24**, **25 Mix** (400 MHz,  $\text{CDCl}_3$ , 300 K)

**Figure S69.**  $^{31}\text{P}$  NMR spectrum of **24**, **25 Mix** (162 MHz,  $\text{CDCl}_3$ , 300 K)

**Figure S70.**  $^1\text{H}\{^{31}\text{P}\}$  NMR spectrum of **24** (400 MHz,  $\text{CDCl}_3$ , 300 K)

**Figure S71.**  $^1\text{H}$  NMR spectrum of **26** (400 MHz,  $\text{CDCl}_3$ , 300 K)

**Figure S72.**  $^{13}\text{C}$  NMR spectrum of **26** (101 MHz,  $\text{CDCl}_3$ , 300 K)

**Figure S73.**  $^{31}\text{P}$  NMR spectrum of **26** (162 MHz,  $\text{CDCl}_3$ , 300 K)

**Figure S74.**  $^1\text{H}$  NMR spectrum of **27** (400 MHz,  $\text{CDCl}_3$ , 300 K)

**Figure S75.**  $^{31}\text{P}$  NMR spectrum of **27** (162 MHz,  $\text{CDCl}_3$ , 300 K)

**Figure S76.**  $^1\text{H}$  NMR spectrum of **28** (600 MHz,  $\text{CDCl}_3$ , 300 K)

**Figure S77.**  $^{13}\text{C}$  NMR spectrum of **28** (151 MHz,  $\text{CDCl}_3$ , 300 K)

**Figure S78.**  $^{31}\text{P}$  NMR spectrum of **28** (243 MHz,  $\text{CDCl}_3$ , 300 K)

**Figure S79.**  $^1\text{H}$  NMR spectrum of **29** (600 MHz,  $\text{CDCl}_3$ , 300 K)

**Figure S80.**  $^{13}\text{C}$  NMR spectrum of **29** (151 MHz,  $\text{CDCl}_3$ , 300 K)

**Figure S81.**  $^{31}\text{P}$  NMR spectrum of **29** (243 MHz,  $\text{CDCl}_3$ , 300 K)

**Figure S82.**  $^1\text{H}$  NMR spectrum of **30** (400 MHz,  $\text{CDCl}_3$ , 300 K)

**Figure S83.**  $^{13}\text{C}$  NMR spectrum of **30** (101 MHz,  $\text{CDCl}_3$ , 300 K)

**Figure S84.**  $^1\text{H}$  NMR spectrum of **31** (400 MHz,  $\text{CDCl}_3$ , 300 K)

**Figure S85.**  $^{13}\text{C}$  NMR spectrum of **31** (101 MHz,  $\text{CDCl}_3$ , 300 K)

**Figure S86.**  $^1\text{H}$  NMR spectrum of **32** (400 MHz,  $\text{CDCl}_3$ , 300 K)

**Figure S87.**  $^{13}\text{C}$  NMR spectrum of **32** (101 MHz,  $\text{CDCl}_3$ , 300 K)

**Figure S88.**  $^1\text{H}$  NMR spectrum of **33** (400 MHz,  $\text{CDCl}_3$ , 300 K)

**Figure S89.**  $^{13}\text{C}$  NMR spectrum of **33** (101 MHz,  $\text{CDCl}_3$ , 300 K)

**Figure S90.**  $^1\text{H}$  NMR spectrum of **34** (400 MHz,  $\text{CDCl}_3$ , 300 K)

**Figure S91.**  $^{13}\text{C}$  NMR spectrum of **34** (101 MHz,  $\text{CDCl}_3$ , 300 K)

**Figure S92.**  $^1\text{H}$  NMR spectrum of **35** (400 MHz,  $\text{CDCl}_3$ , 300 K)

**Figure S93.**  $^{13}\text{C}$  NMR spectrum of **35** (101 MHz,  $\text{CDCl}_3$ , 300 K)

**Figure S94.**  $^1\text{H}$ -NMR spectrum of *N*-methylene proton regions (geminal coupling) of 6-membered complex, **18**

**Figure S95.**  $^1\text{H}$ -NMR spectra of methyl signal of 6-membered complexes, **18** (the below is normal  $^1\text{H}$ -NMR. The above is phosphorus decoupled spectrum)

**Figure S96** The Pt(II) Hydride region in the variable  $^1\text{H}$ -NMR (400 MHz) spectra of complex **16**.

**Table - SM1** X-ray data collection and structure refinements

|                                               | <b>4</b>                                                          | <b>10·(CH<sub>2</sub>Cl<sub>2</sub>)</b>                                                       | <b>12</b>                                                                      | <b>16</b>                                                         | <b>18·(CH<sub>2</sub>Cl<sub>2</sub>)</b>                                          |
|-----------------------------------------------|-------------------------------------------------------------------|------------------------------------------------------------------------------------------------|--------------------------------------------------------------------------------|-------------------------------------------------------------------|-----------------------------------------------------------------------------------|
| formula                                       | C <sub>15</sub> H <sub>28</sub> N <sub>4</sub> P <sub>2</sub> PdS | C <sub>29</sub> H <sub>44</sub> Cl <sub>2</sub> N <sub>8</sub> P <sub>2</sub> PdS <sub>2</sub> | C <sub>18</sub> H <sub>34</sub> N <sub>8</sub> P <sub>2</sub> PdS <sub>2</sub> | C <sub>15</sub> H <sub>28</sub> N <sub>4</sub> P <sub>2</sub> PtS | C <sub>11</sub> H <sub>26</sub> Cl <sub>2</sub> N <sub>4</sub> P <sub>2</sub> PtS |
| fw                                            | 464.81                                                            | 808.08                                                                                         | 594.99                                                                         | 553.50                                                            | 574.35                                                                            |
| temperature, K                                | 296(2)                                                            | 223(2)                                                                                         | 223(2)                                                                         | 223(2)                                                            | 223(2)                                                                            |
| crystal size (mm <sup>3</sup> )               | 0.68 × 0.48 × 0.36                                                | 0.15×0.10×0.07                                                                                 | 0.13×0.12×0.10                                                                 | 0.20×0.11×0.08                                                    | 0.15×0.10×0.07                                                                    |
| crystal system                                | monoclinic                                                        | orthorhombic                                                                                   | monoclinic                                                                     | monoclinic                                                        | monoclinic                                                                        |
| space group                                   | <i>P2<sub>1</sub>/c</i>                                           | <i>C222<sub>1</sub></i>                                                                        | <i>P2<sub>1</sub>/c</i>                                                        | <i>P2<sub>1</sub>/n</i>                                           | <i>P-1</i>                                                                        |
| <i>a</i> , Å                                  | 11.2692(4)                                                        | 12.1391(7)                                                                                     | 10.481(2)                                                                      | 9.802(2)                                                          | 11.205(7)                                                                         |
| <i>b</i> , Å                                  | 10.0561(4)                                                        | 19.4487(11)                                                                                    | 14.414(4)                                                                      | 19.264(4)                                                         | 11.285(7)                                                                         |
| <i>c</i> , Å                                  | 18.5744(6)                                                        | 15.6956(8)                                                                                     | 18.274(5)                                                                      | 12.273(3)                                                         | 17.208(13)                                                                        |
| ∠, deg                                        | 94.113(2)                                                         | 90                                                                                             | 106.241(7)                                                                     | 113.057(7)                                                        | 99.31(2)                                                                          |
| <i>V</i> , Å <sup>3</sup>                     | 2099.51(13)                                                       | 3705.6(4)                                                                                      | 2650.6(11)                                                                     | 2132.3(7)                                                         | 2027(2)                                                                           |
| <i>Z</i>                                      | 4                                                                 | 4                                                                                              | 4                                                                              | 4                                                                 | 4                                                                                 |
| <i>d</i> <sub>calc</sub> , g cm <sup>-3</sup> | 1.471                                                             | 1.448                                                                                          | 1.491                                                                          | 1.724                                                             | 1.881                                                                             |
| ∠, mm <sup>-1</sup>                           | 1.139                                                             | 0.876                                                                                          | 1.000                                                                          | 6.832                                                             | 7.439                                                                             |
| <i>F</i> (000)                                | 952                                                               | 1664                                                                                           | 1224                                                                           | 1080                                                              | 1112                                                                              |
| <i>T</i> <sub>min</sub>                       | 0.5113                                                            | 0.880                                                                                          | 0.6681                                                                         | 0.340                                                             | 0.400                                                                             |
| <i>T</i> <sub>max</sub>                       | 0.6845                                                            | 0.941                                                                                          | 0.810                                                                          | 0.611                                                             | 0.616                                                                             |
| No. of reflns Measured                        | 45218                                                             | 70396                                                                                          | 57571                                                                          | 79387                                                             | 78215                                                                             |
| No. of reflns Unique                          | 5271                                                              | 4619                                                                                           | 5200                                                                           | 4178                                                              | 7953                                                                              |
| No. of reflns with <i>I</i> > 2σ( <i>I</i> )  | 4906                                                              | 4004                                                                                           | 4310                                                                           | 3722                                                              | 7054                                                                              |
| No. of params Refined                         | 209                                                               | 204                                                                                            | 320                                                                            | 212                                                               | 379                                                                               |
| Max., in Δρ (e Å <sup>-3</sup> )              | 0.317                                                             | 0.550                                                                                          | 0.856                                                                          | 1.096                                                             | 1.859                                                                             |
| Min., in Δρ (e Å <sup>-3</sup> )              | -0.298                                                            | -0.312                                                                                         | -0.613                                                                         | -0.800                                                            | -0.631                                                                            |
| <i>GOF</i> on <i>F</i> <sup>2</sup>           | 1.068                                                             | 1.053                                                                                          | 1.021                                                                          | 1.068                                                             | 1.042                                                                             |
| <i>R1</i> <sup>a</sup>                        | 0.0190                                                            | 0.0313                                                                                         | 0.0303                                                                         | 0.0202                                                            | 0.0312                                                                            |
| <i>wR2</i> <sup>b</sup>                       | 0.0496                                                            | 0.0568                                                                                         | 0.0818                                                                         | 0.0449                                                            | 0.0781                                                                            |
| <i>R</i> (all data)                           | 0.0216                                                            | 0.0451                                                                                         | 0.0411                                                                         | 0.0255                                                            | 0.0370                                                                            |
| <i>wR2</i> <sup>a</sup> (all data)            | 0.0524                                                            | 0.0606                                                                                         | 0.0927                                                                         | 0.0470                                                            | 0.0813                                                                            |

$$^a R1 = \sum ||F_o| - |F|| / \sum |F_o|, \quad ^b wR2 = \sum [w(F_o^2 - F_c^2)^2] / \sum [w(F_o^2)^2]^{1/2}$$

|                                                       | 20                                                                | 23                                                                | 31                                                |
|-------------------------------------------------------|-------------------------------------------------------------------|-------------------------------------------------------------------|---------------------------------------------------|
| formula                                               | C <sub>20</sub> H <sub>28</sub> N <sub>4</sub> P <sub>2</sub> PtS | C <sub>11</sub> H <sub>26</sub> N <sub>4</sub> P <sub>2</sub> PtS | C <sub>17</sub> H <sub>16</sub> N <sub>4</sub> OS |
| fw                                                    | 613.55                                                            | 503.45                                                            | 324.40                                            |
| temperature, K                                        | 223(2)                                                            | 223(2)                                                            | 223(2)                                            |
| crystal size (mm <sup>3</sup> )                       | 0.16×0.14×0.09                                                    | 0.12×0.07×0.07                                                    | 0.27×0.11×0.08                                    |
| crystal system                                        | monoclinic                                                        | triclinic                                                         | monoclinic                                        |
| space group                                           | <i>P2<sub>1</sub>/c</i>                                           | <i>P-1</i>                                                        | <i>P2<sub>1</sub>/n</i>                           |
| <i>a</i> , Å                                          | 10.6808(11)                                                       | 6.5317(9)                                                         | 12.572(5)                                         |
| <i>b</i> , Å                                          | 12.6140(13)                                                       | 9.9539(15)                                                        | 8.002(2)                                          |
| <i>c</i> , Å                                          | 20.6847(16)                                                       | 14.2527(19)                                                       | 16.371(5)                                         |
| $\beta$ , deg                                         | 102.441(3)                                                        | 94.011(4)                                                         | 101.725(11)                                       |
| <i>V</i> , Å <sup>3</sup>                             | 2321.4(4)                                                         | 922.9(2)                                                          | 1612.5(9)                                         |
| <i>Z</i>                                              | 4                                                                 | 2                                                                 | 4                                                 |
| <i>d</i> <sub>calc</sub> , g cm <sup>-3</sup>         | 1.756                                                             | 1.812                                                             | 1.336                                             |
| $\mu$ , mm <sup>-1</sup>                              | 6.285                                                             | 7.882                                                             | 0.210                                             |
| <i>F</i> (000)                                        | 1200                                                              | 488                                                               | 680                                               |
| <i>T</i> <sub>min</sub>                               | 0.442                                                             | 0.451                                                             | 0.946                                             |
| <i>T</i> <sub>max</sub>                               | 0.602                                                             | 0.608                                                             | 0.984                                             |
| No. of reflns Measured                                | 43785                                                             | 32917                                                             | 20093                                             |
| No. of reflns Unique                                  | 5850                                                              | 4599                                                              | 3172                                              |
| No. of reflns with <i>I</i> > 2 $\sigma$ ( <i>I</i> ) | 4452                                                              | 4204                                                              | 2484                                              |
| No. of params Refined                                 | 253                                                               | 182                                                               | 208                                               |
| Max., in $\Delta\rho$ (e Å <sup>-3</sup> )            | 1.809                                                             | 0.718                                                             | 0.713                                             |
| Min., in $\Delta\rho$ (e Å <sup>-3</sup> )            | -1.616                                                            | -0.551                                                            | -0.779                                            |
| <i>GOF</i> on <i>F</i> <sup>2</sup>                   | 1.057                                                             | 1.092                                                             | 1.109                                             |
| <i>R</i> 1 <sup>a</sup>                               | 0.0449                                                            | 0.0223                                                            | 0.0547                                            |
| <i>wR</i> 2 <sup>b</sup>                              | 0.0924                                                            | 0.0497                                                            | 0.1650                                            |
| <i>R</i> (all data)                                   | 0.0662                                                            | 0.0270                                                            | 0.0814                                            |
| <i>wR</i> 2 <sup>a</sup> (all data)                   | 0.0997                                                            | 0.0513                                                            | 0.2001                                            |

<sup>a</sup>*R*1 =  $\Sigma||F_o| - |F||\Sigma|F_o|$ , <sup>b</sup>*wR*2 =  $\Sigma[w(F_o^2 - F_c^2)^2]/\Sigma[w(F_o^2)^2]^{1/2}$

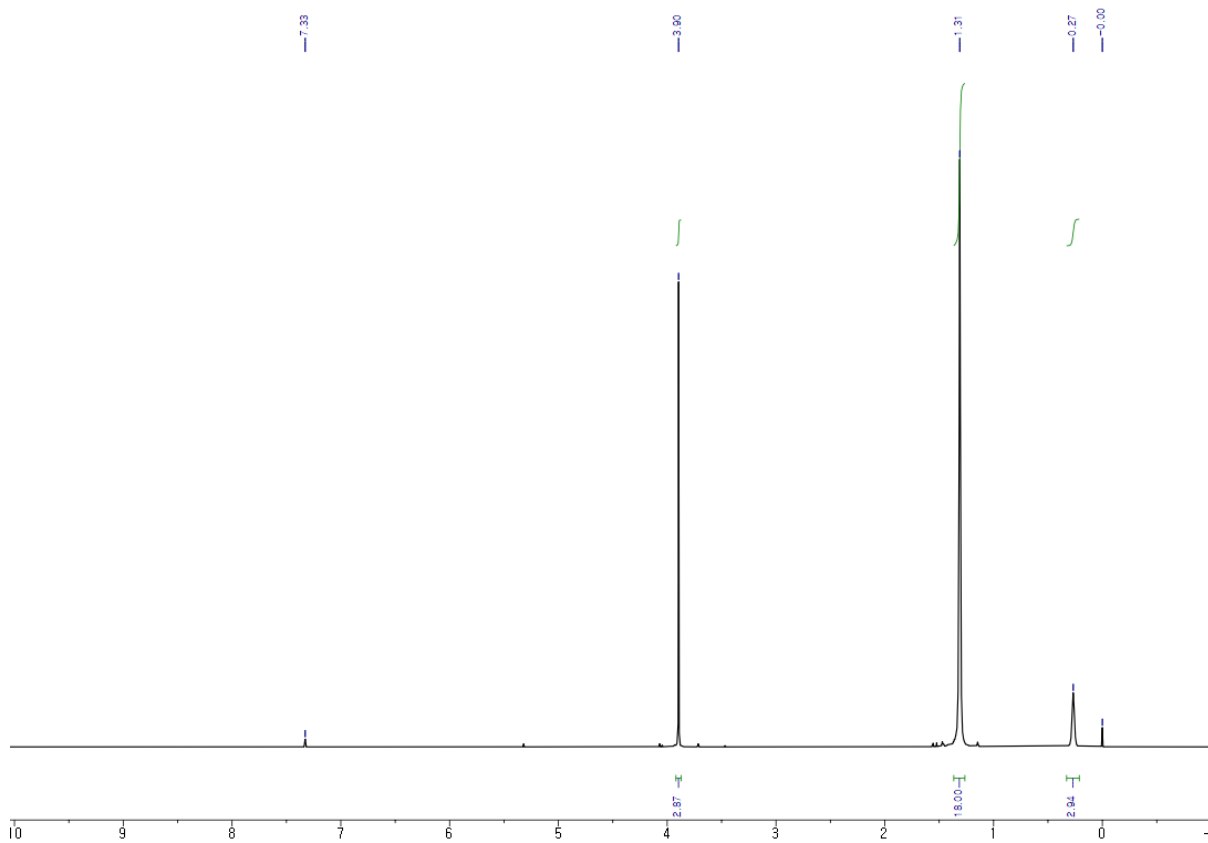

Figure S1.  $^1\text{H}$  NMR spectrum of **1** (400 MHz,  $\text{CDCl}_3$ , 300 K)

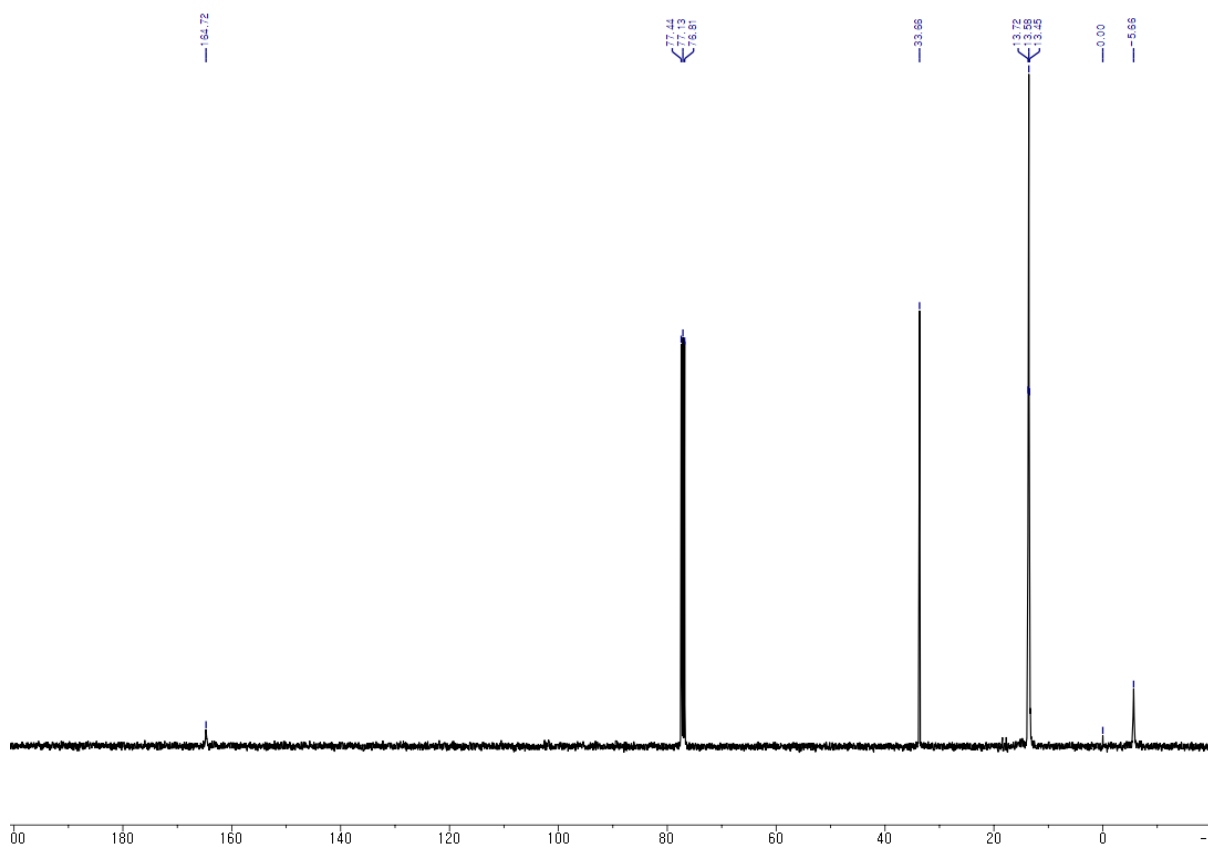

Figure S2.  $^{13}\text{C}$  NMR spectrum of **1** (101 MHz,  $\text{CDCl}_3$ , 300 K)

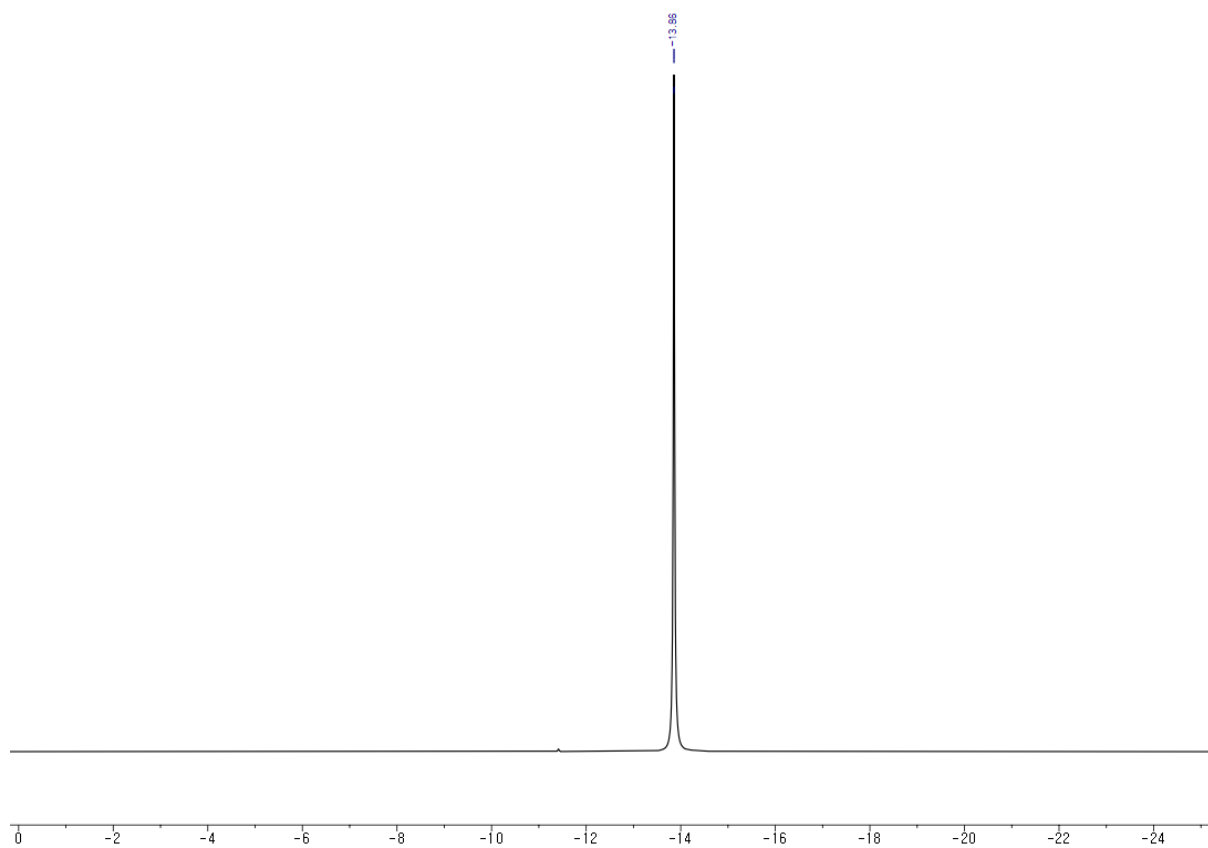

Figure S3.  $^{31}\text{P}$  NMR spectrum of **1** (162 MHz,  $\text{CDCl}_3$ , 300 K)

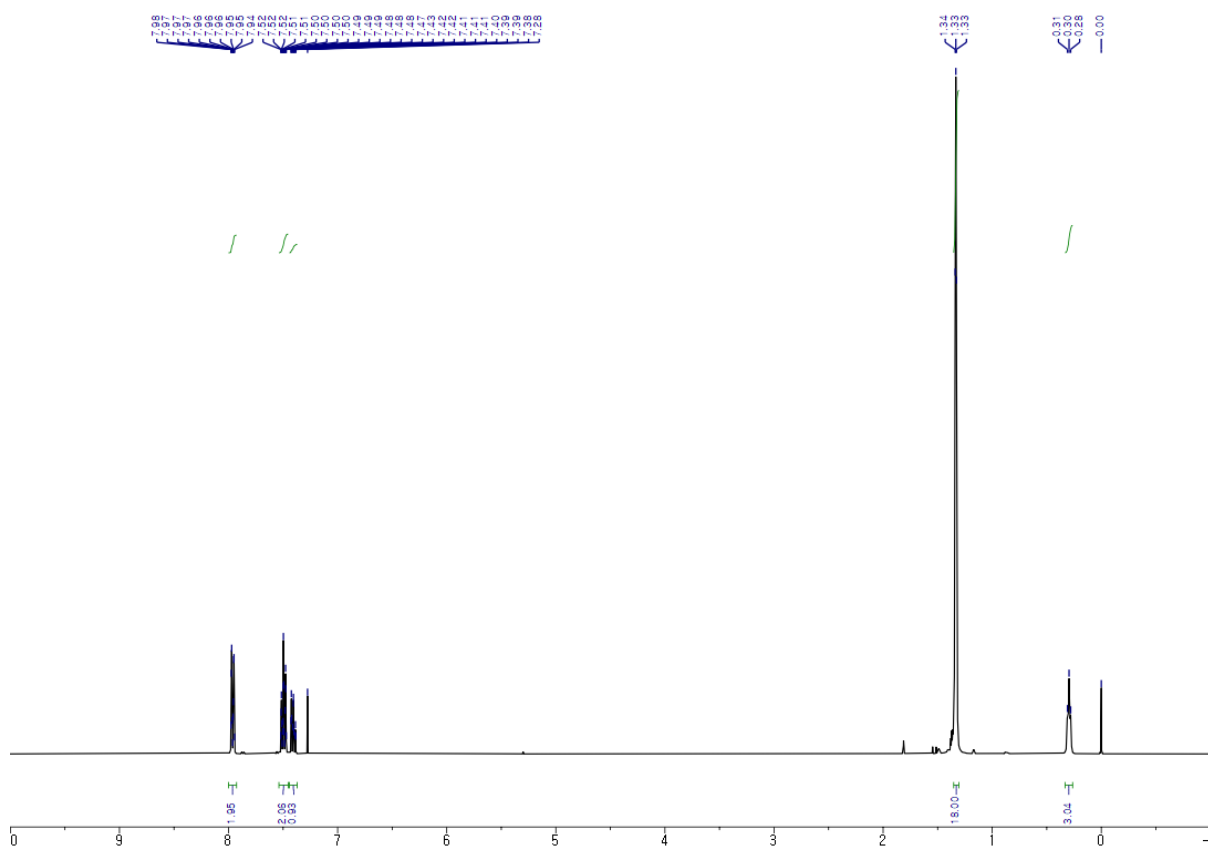

Figure S4.  $^1\text{H}$  NMR spectrum of **2** (400 MHz,  $\text{CDCl}_3$ , 300 K)

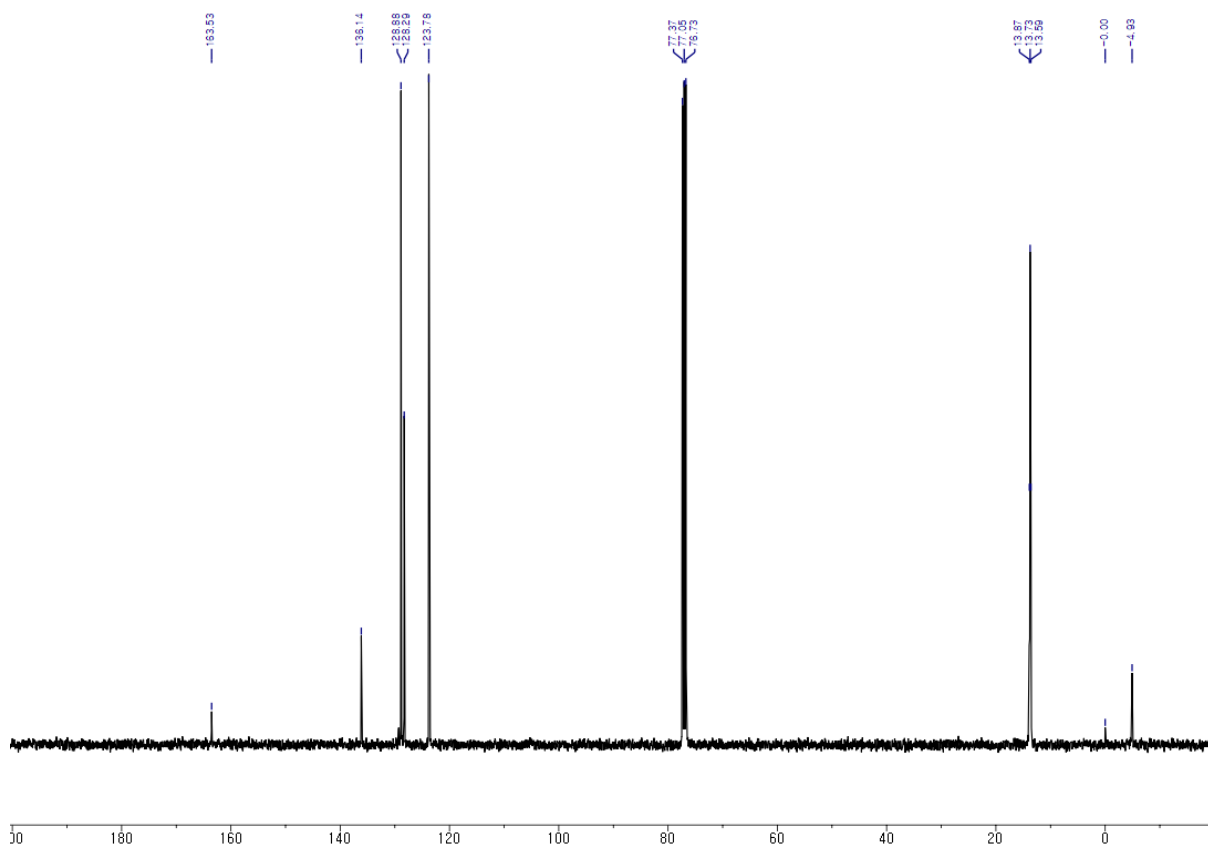

Figure S5.  $^{13}\text{C}$  NMR spectrum of **2** (101 MHz,  $\text{CDCl}_3$ , 300 K)

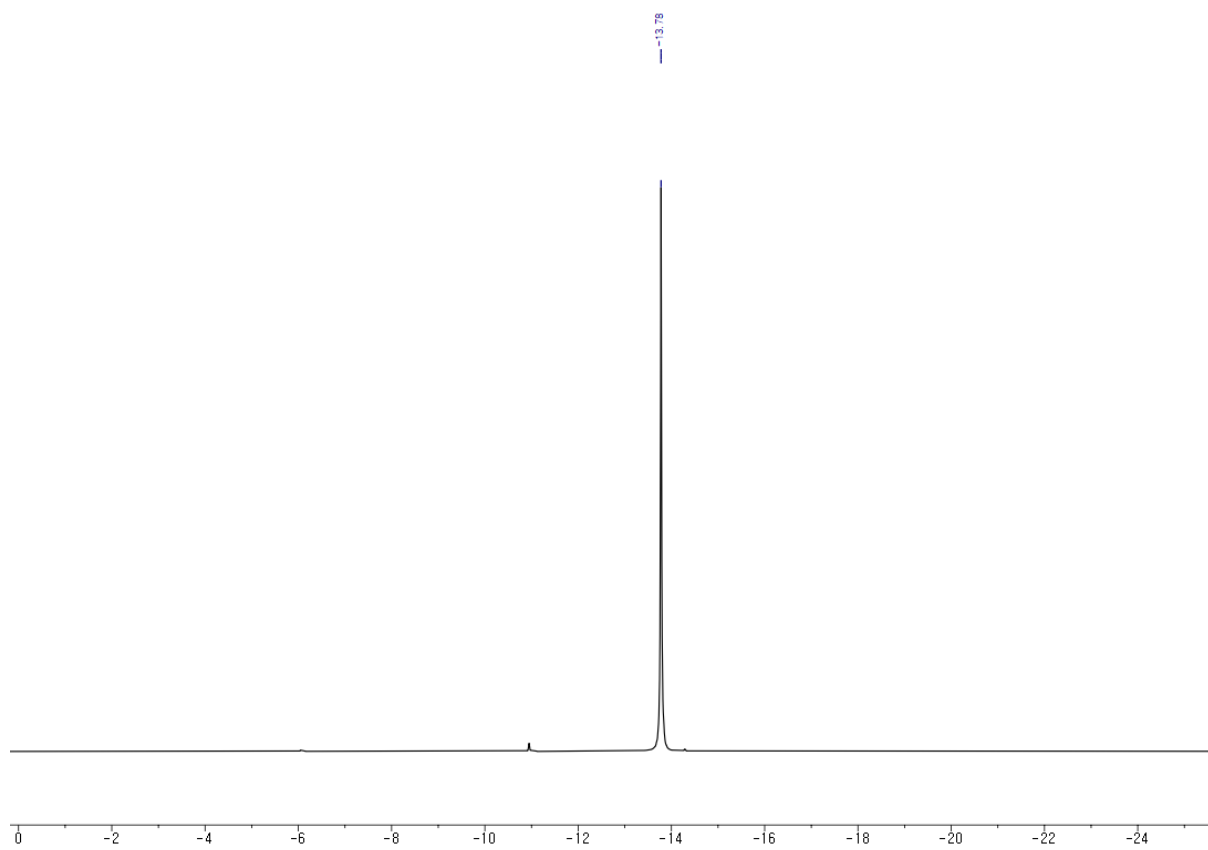

Figure S6.  $^{31}\text{P}$  NMR spectrum of **2** (162 MHz,  $\text{CDCl}_3$ , 300 K)



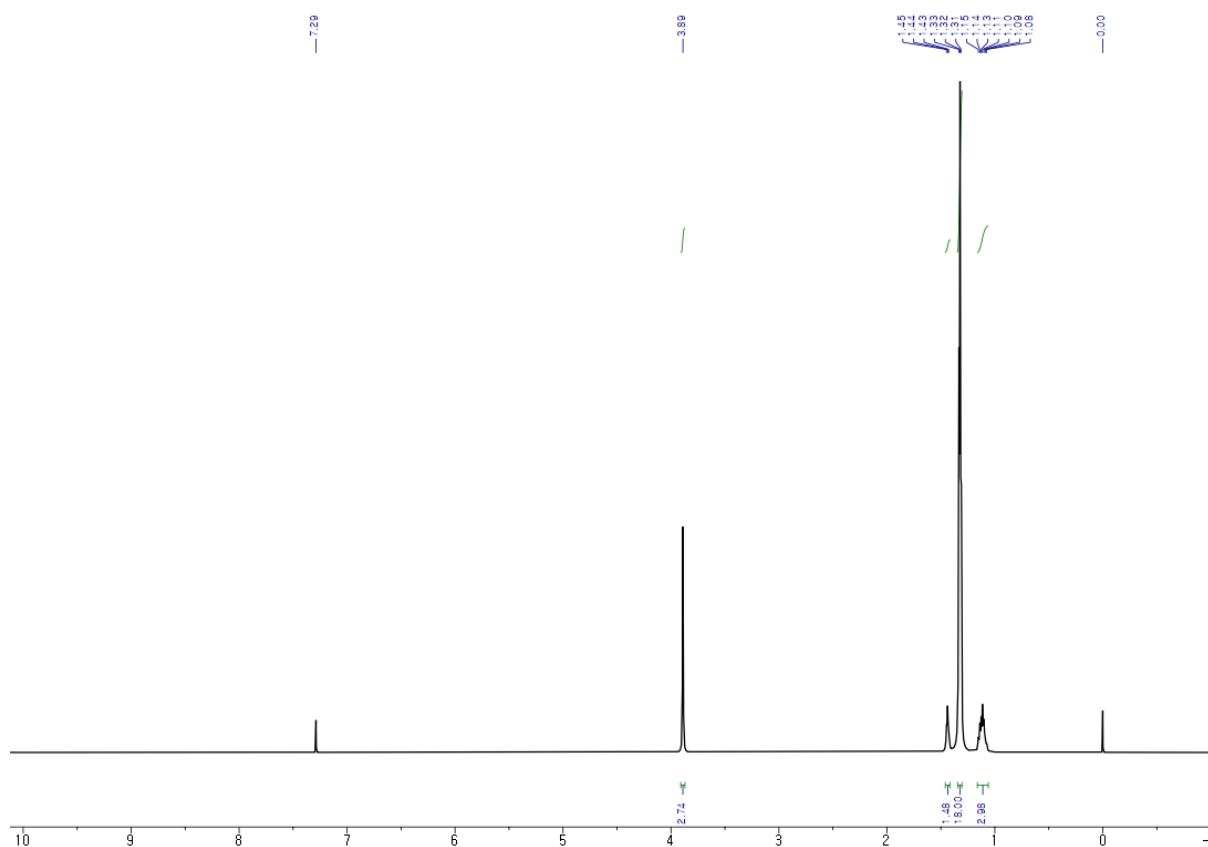

**Figure S7.**  $^1\text{H}$  NMR spectrum of **3** (300 MHz,  $\text{CDCl}_3$ , 300 K)

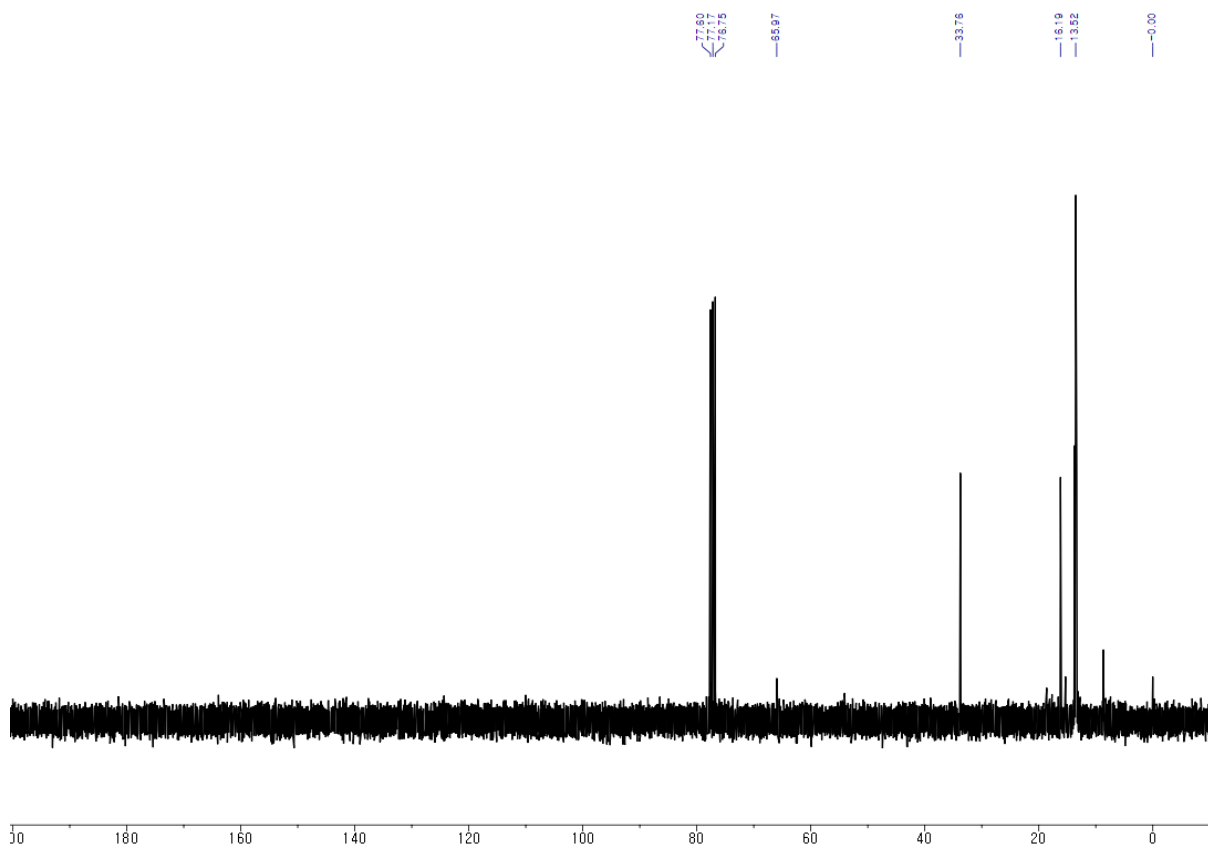

**Figure S8.**  $^{13}\text{C}$  NMR spectrum of **3** (75 MHz,  $\text{CDCl}_3$ , 300 K)

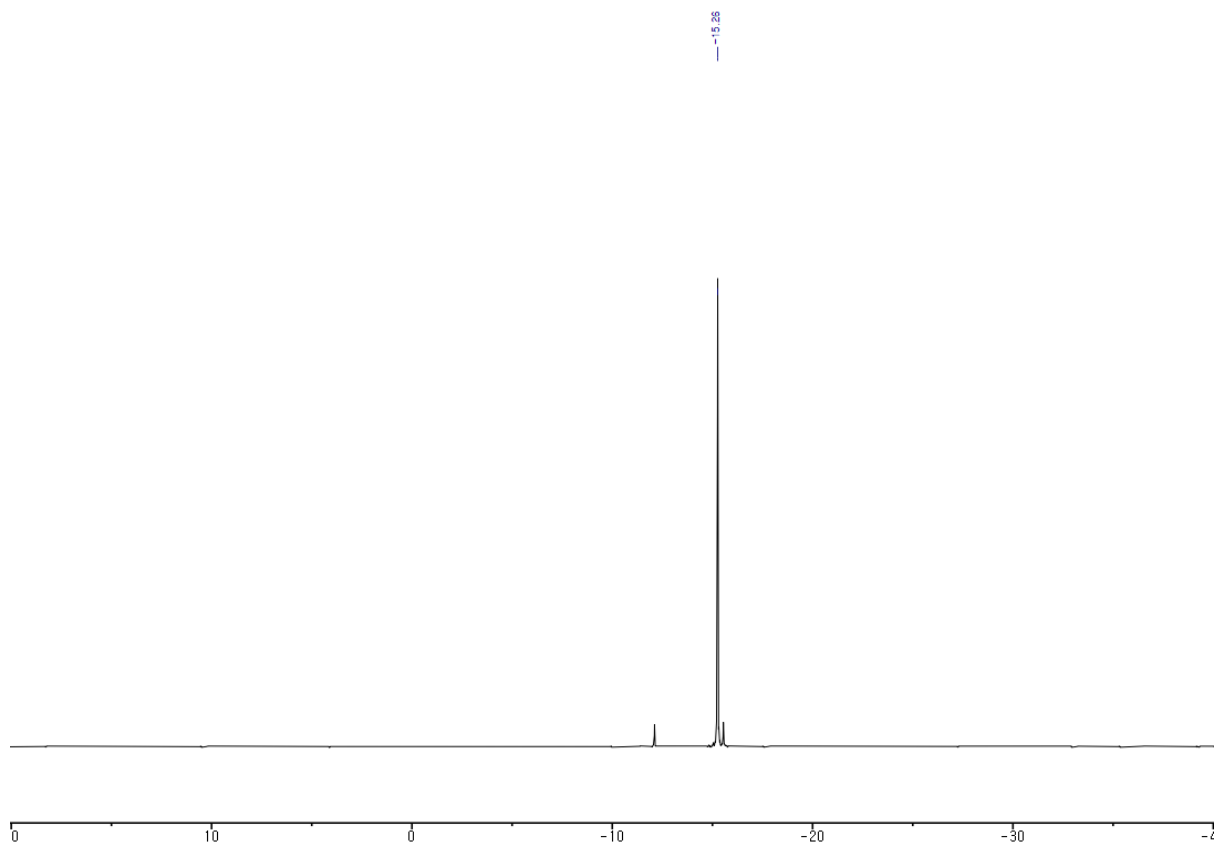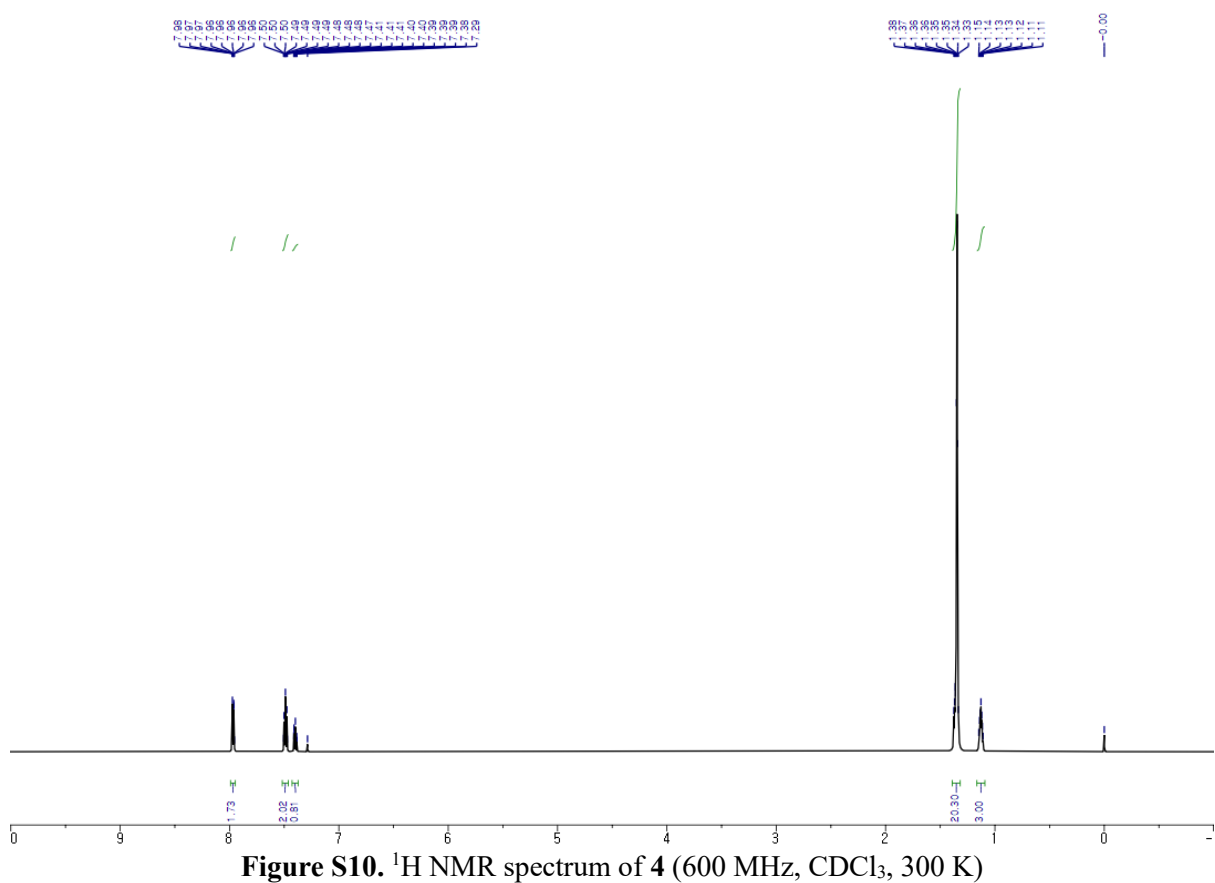

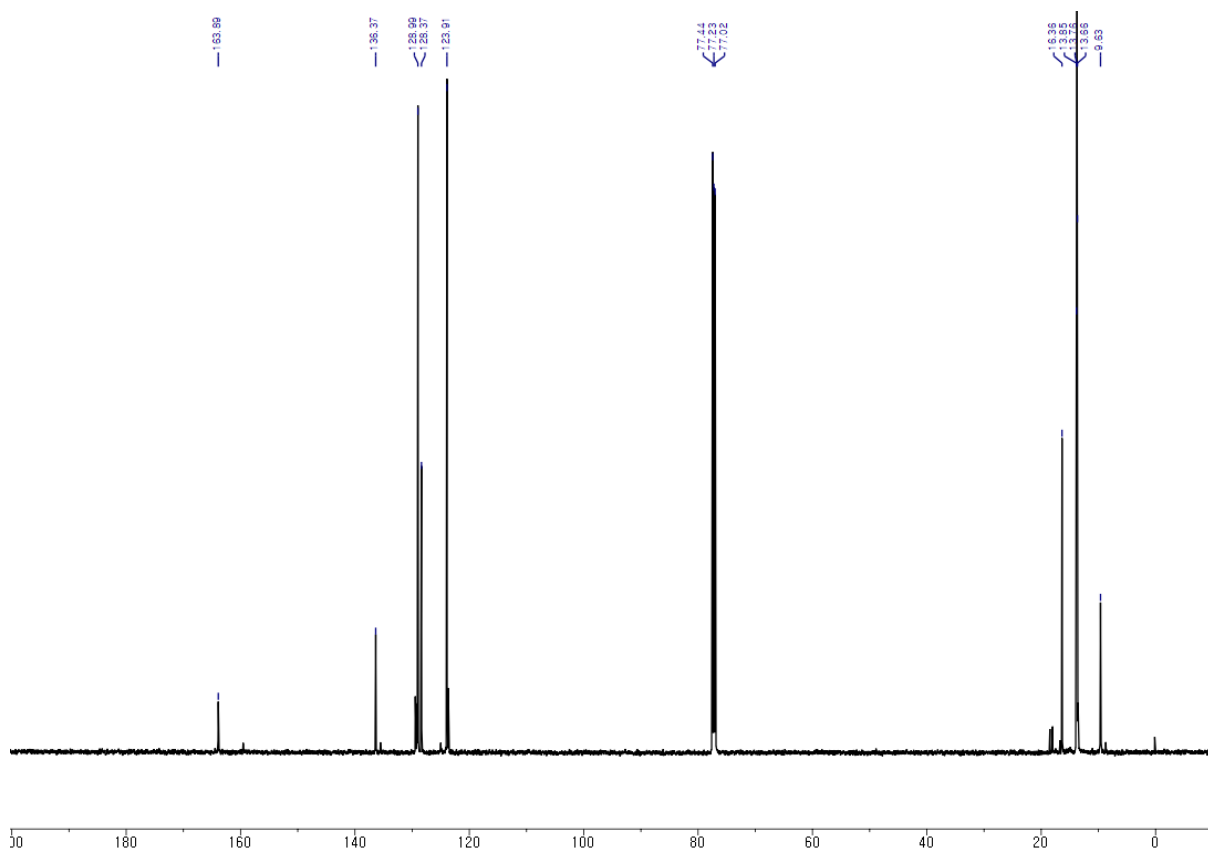

**Figure S11.**  $^{13}\text{C}$  NMR spectrum of **4** (151 MHz,  $\text{CDCl}_3$ , 300 K)

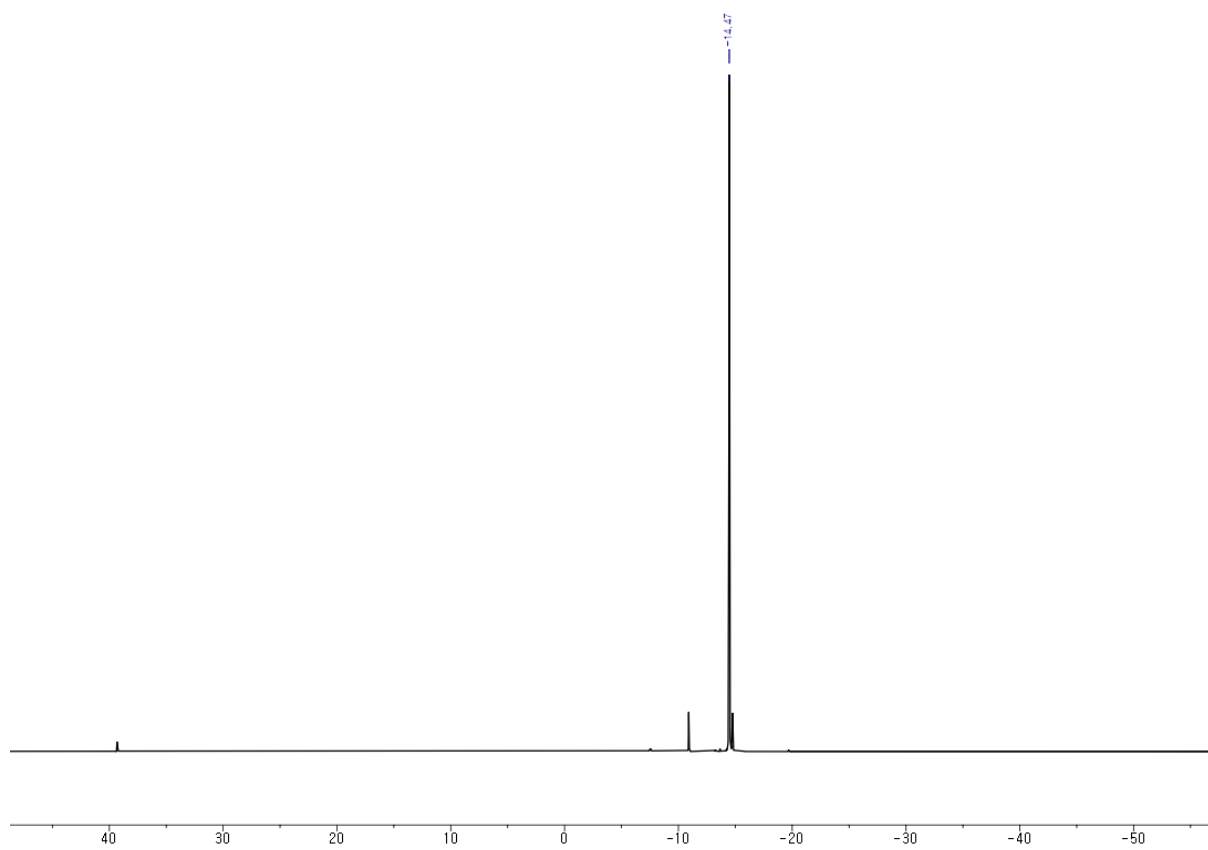

**Figure S12.**  $^{31}\text{P}$  NMR spectrum of **4** (243 MHz,  $\text{CDCl}_3$ , 300 K)

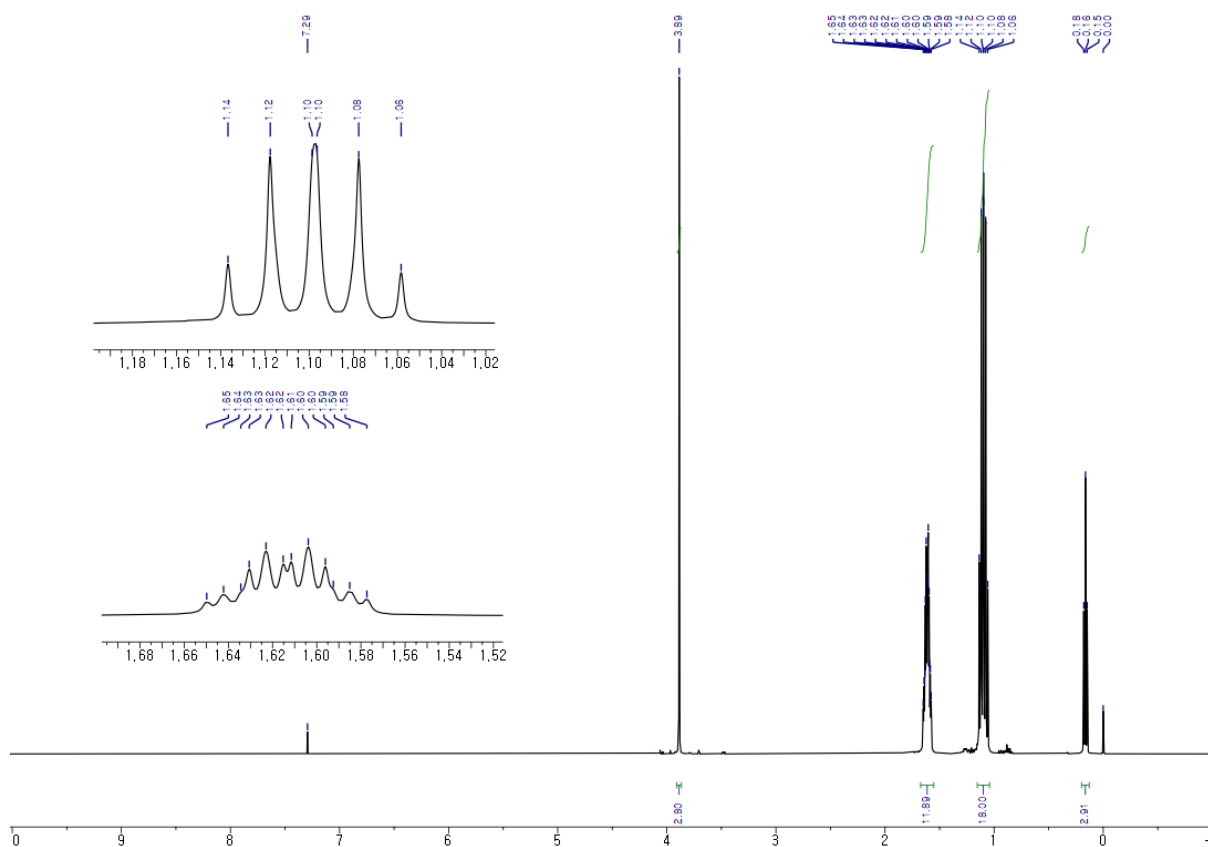

**Figure S13.**  $^1\text{H}$  NMR spectrum of **5** (400 MHz,  $\text{CDCl}_3$ , 300 K)

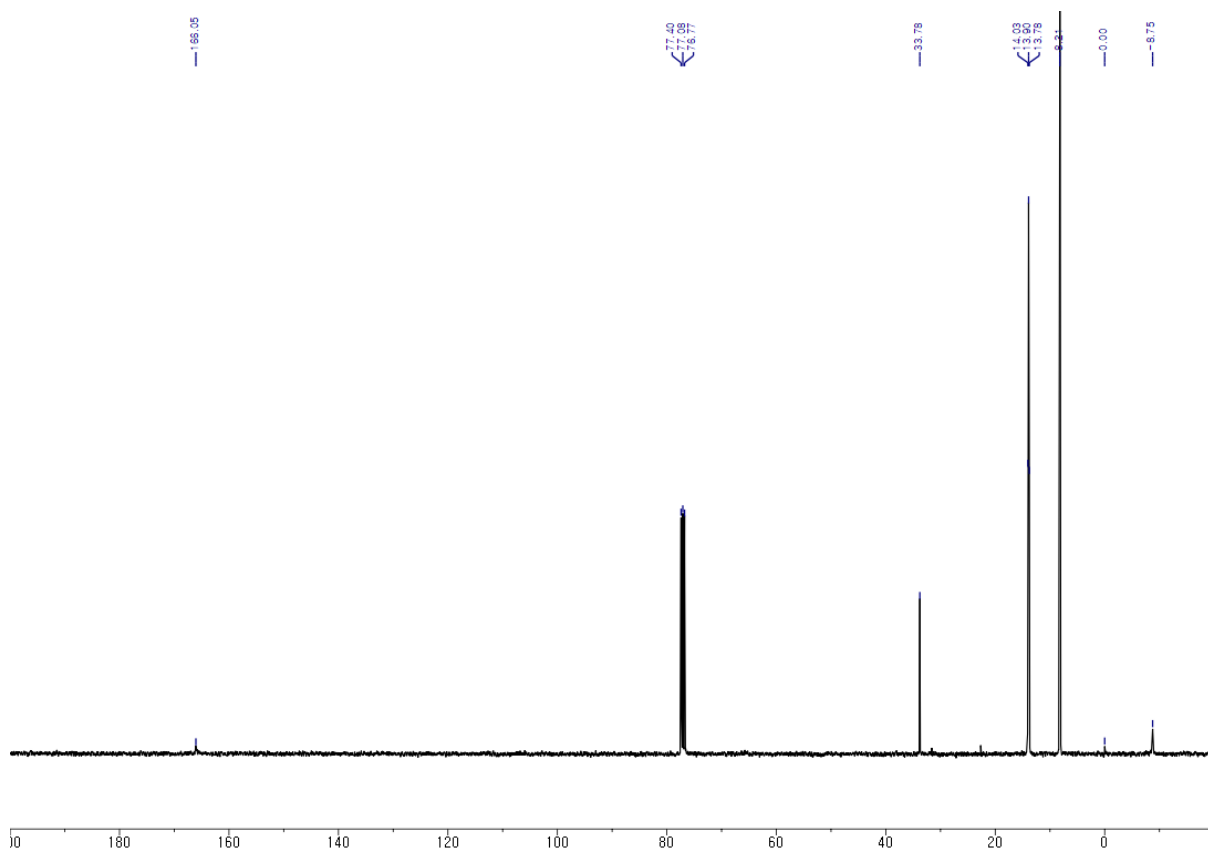

**Figure S14.**  $^{13}\text{C}$  NMR spectrum of **5** (101 MHz,  $\text{CDCl}_3$ , 300 K)

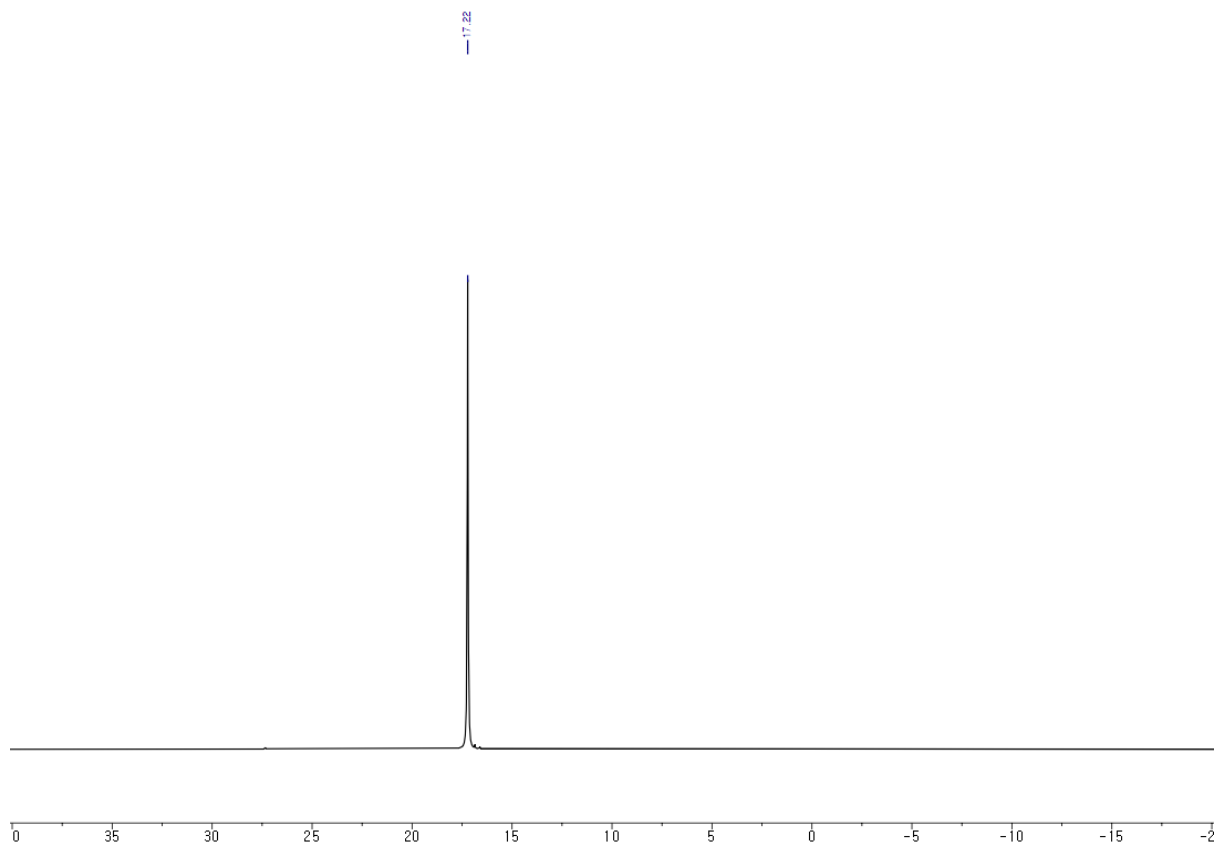

**Figure S15.**  $^{31}\text{P}$  NMR spectrum of **5** (162 MHz,  $\text{CDCl}_3$ , 300 K)

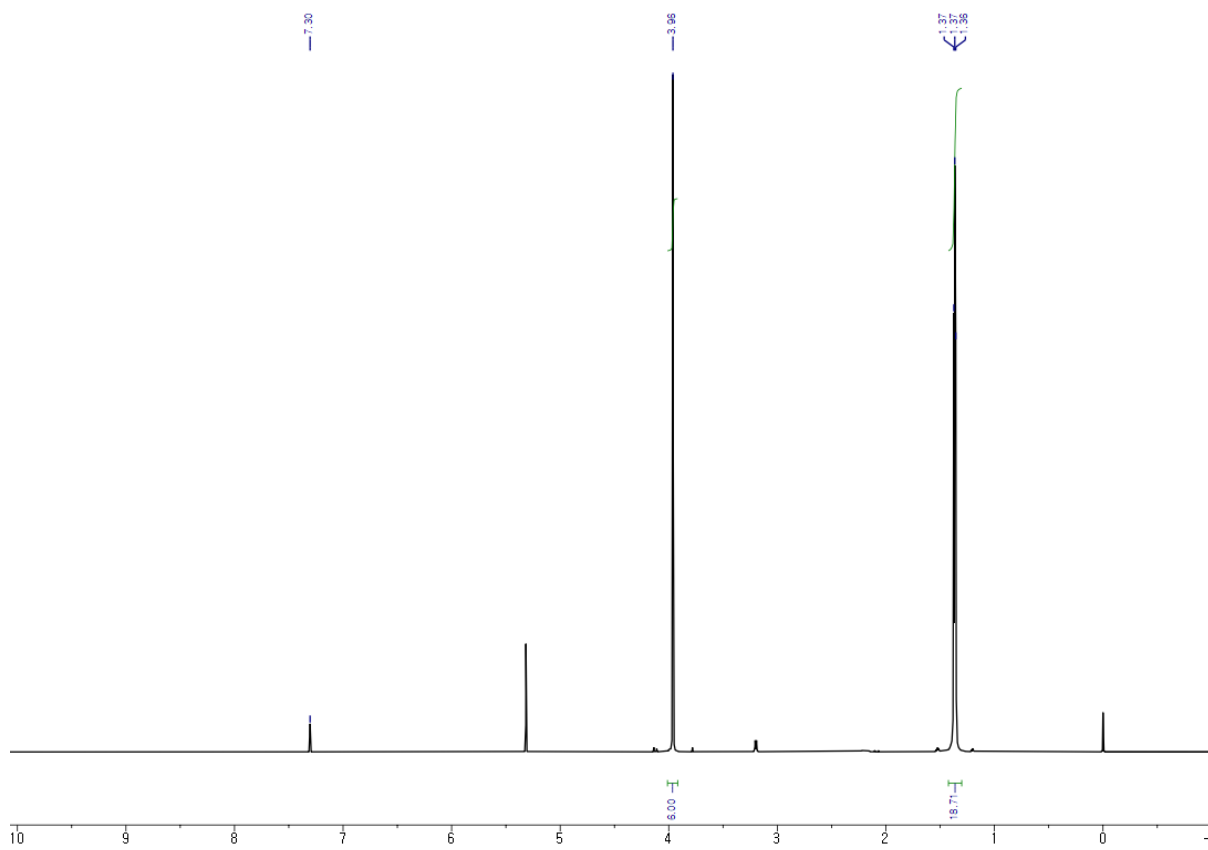

**Figure S16.**  $^1\text{H}$  NMR spectrum of **6** (400 MHz,  $\text{CDCl}_3$ , 300 K)

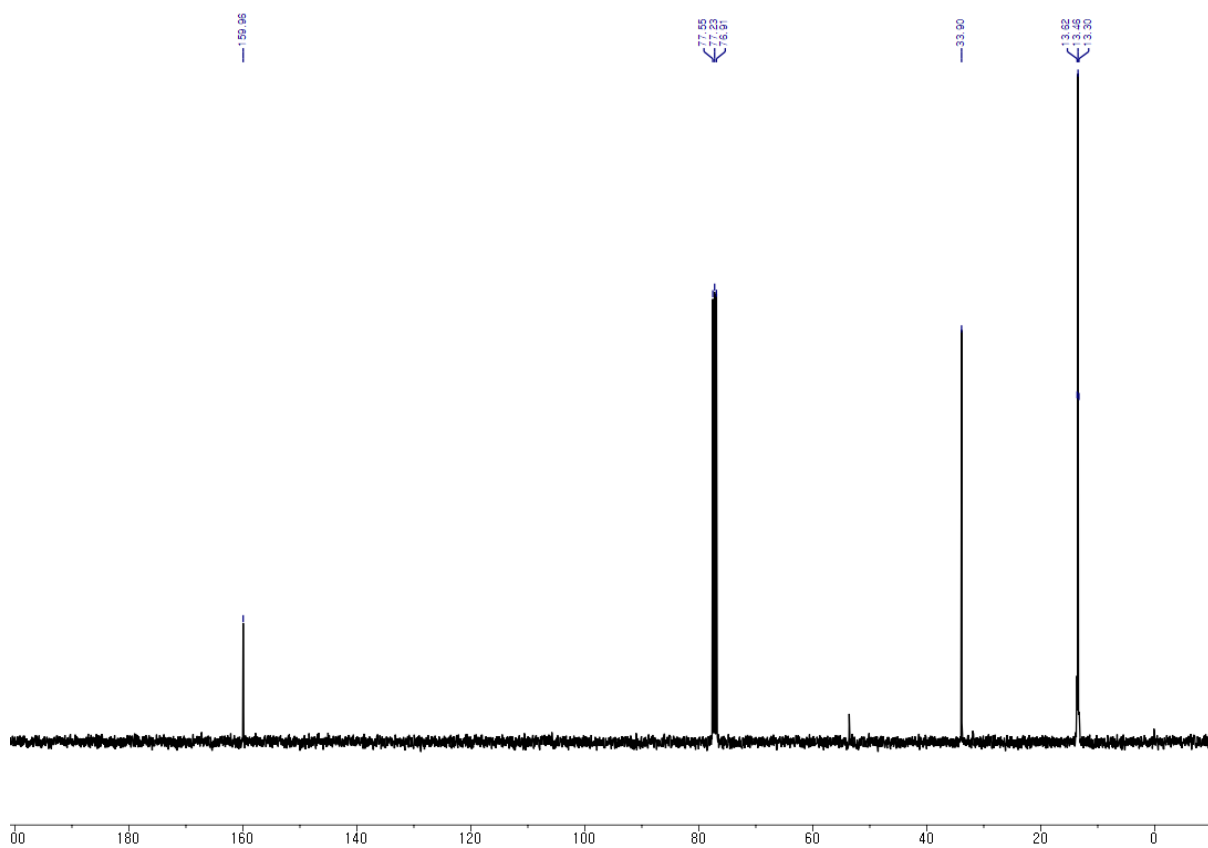

**Figure S17.**  $^{13}\text{C}$  NMR spectrum of **6** (101 MHz,  $\text{CDCl}_3$ , 300 K)

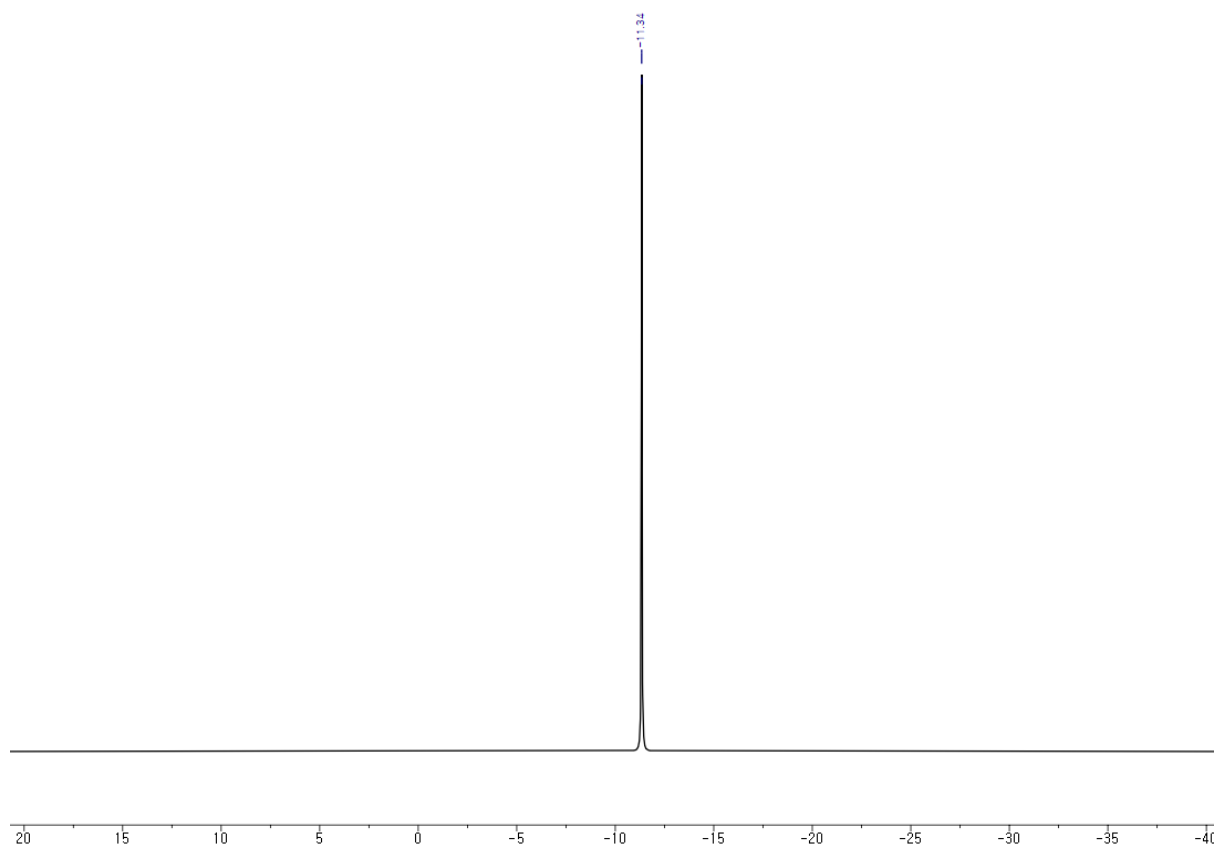

**Figure S18.**  $^{31}\text{P}$  NMR spectrum of **6** (162 MHz,  $\text{CDCl}_3$ , 300 K)

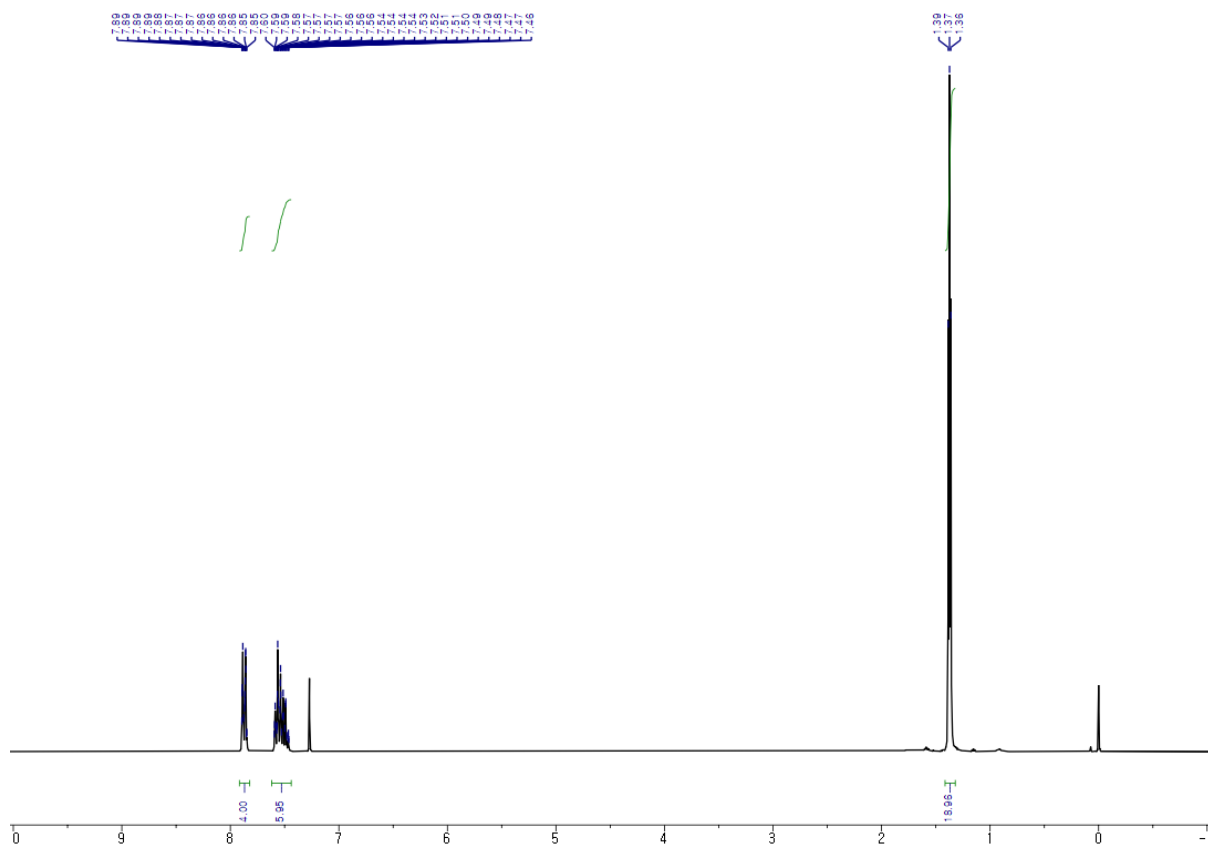

Figure S19.  $^1\text{H}$  NMR spectrum of 7 (300 MHz,  $\text{CDCl}_3$ , 300 K)

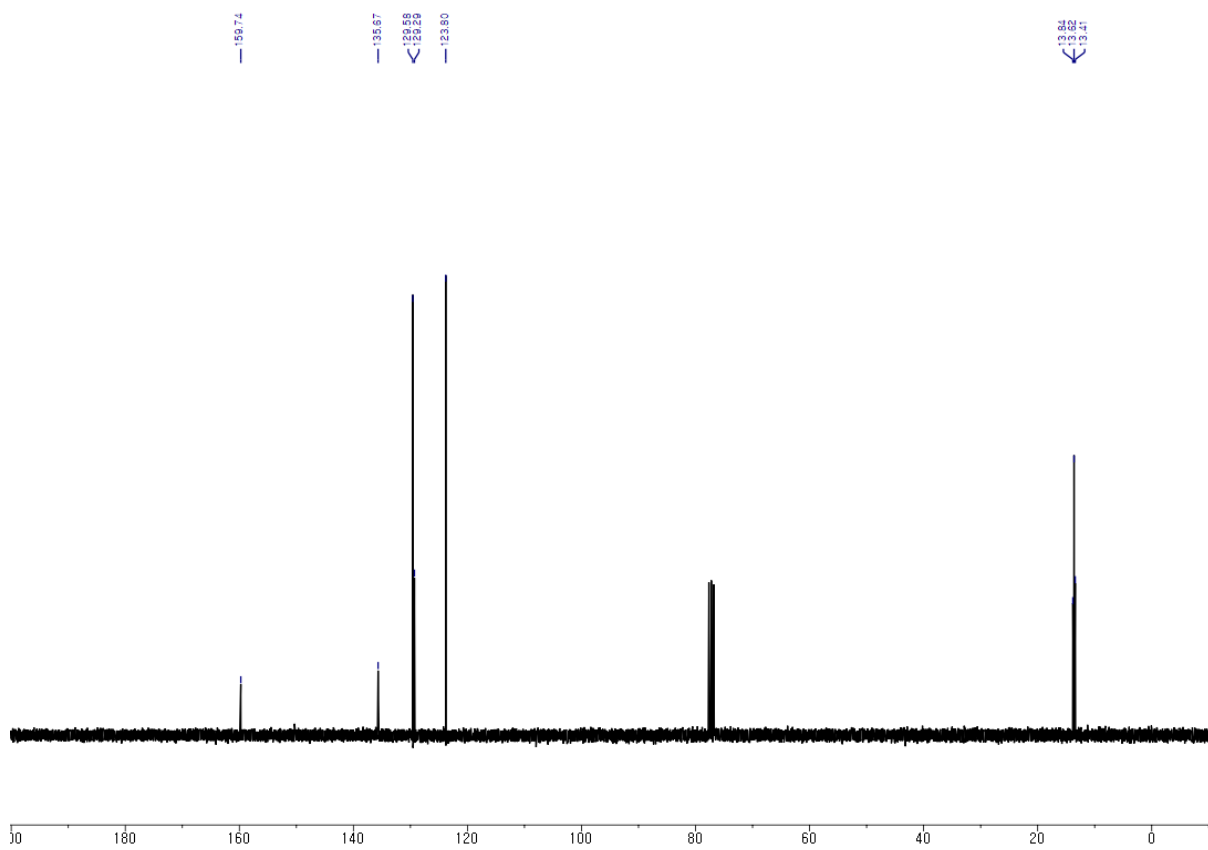

Figure S20.  $^{13}\text{C}$  NMR spectrum of 7 (75 MHz,  $\text{CDCl}_3$ , 300 K)

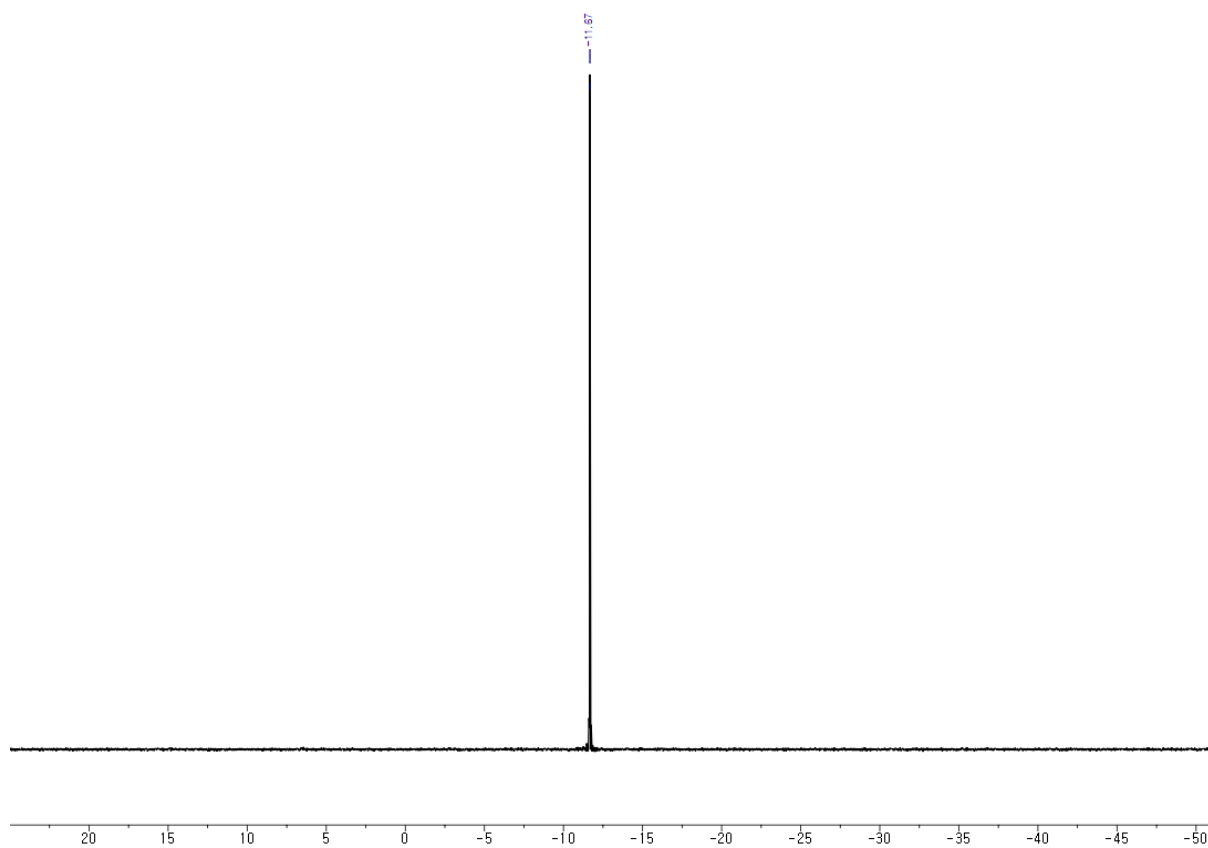

Figure S21.  $^{31}\text{P}$  NMR spectrum of **7** (122 MHz,  $\text{CDCl}_3$ , 300 K)

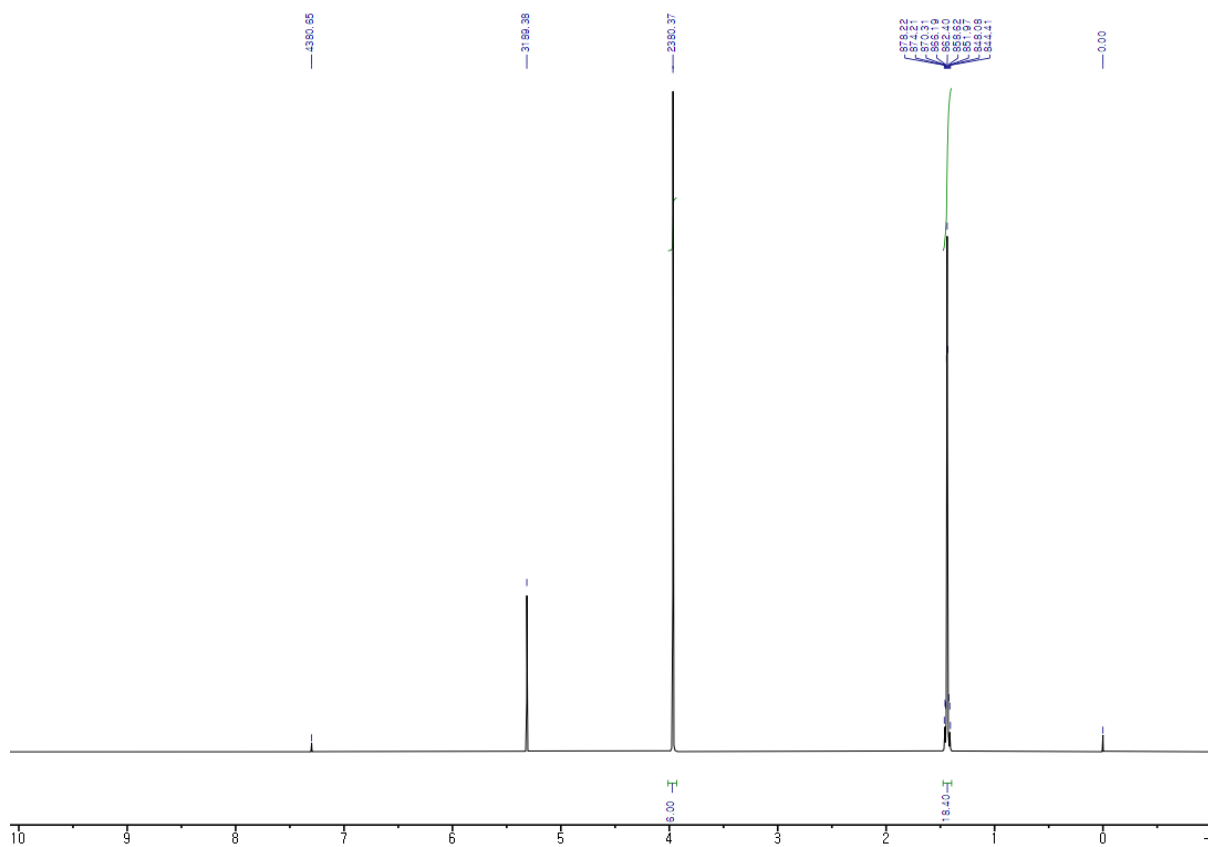

Figure S22.  $^1\text{H}$  NMR spectrum of **8** (600 MHz,  $\text{CDCl}_3$ , 300 K)



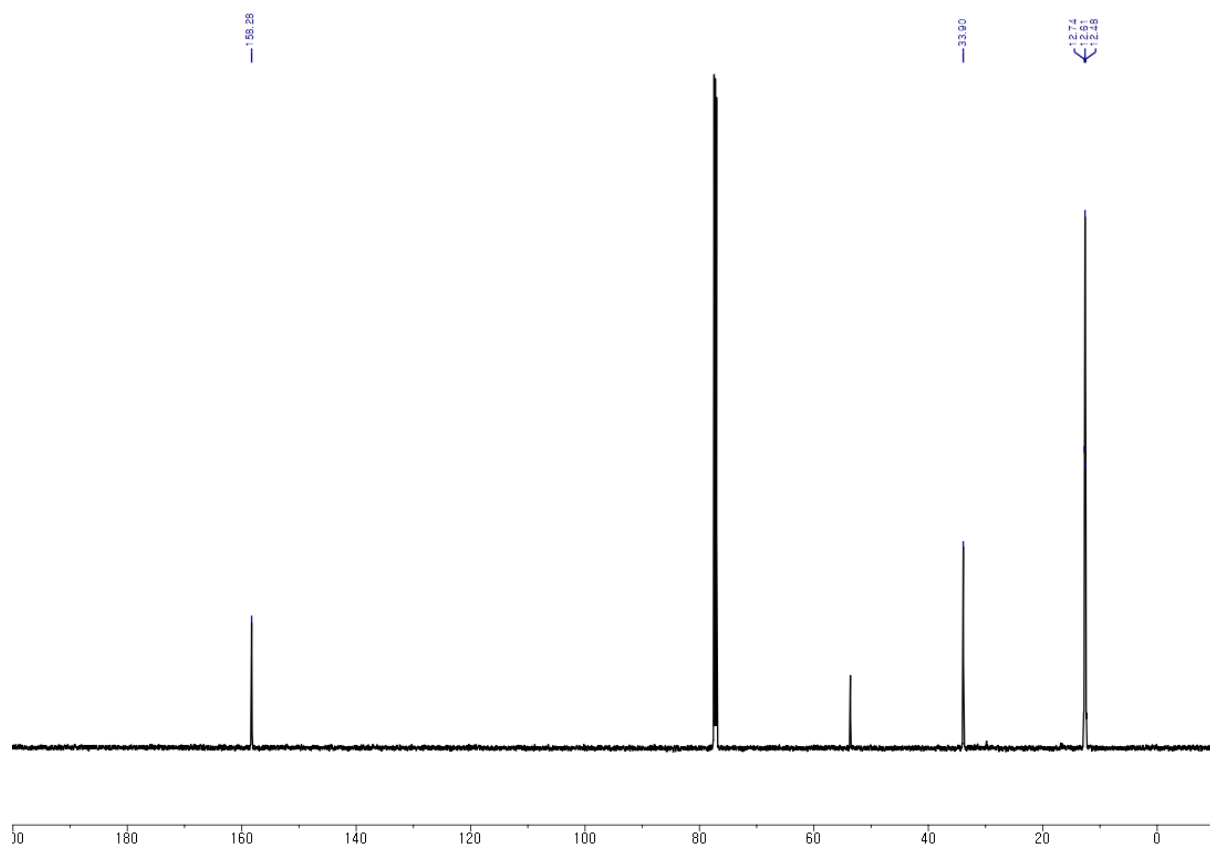

Figure S23.  $^{13}\text{C}$  NMR spectrum of **8** (151 MHz,  $\text{CDCl}_3$ , 300 K)

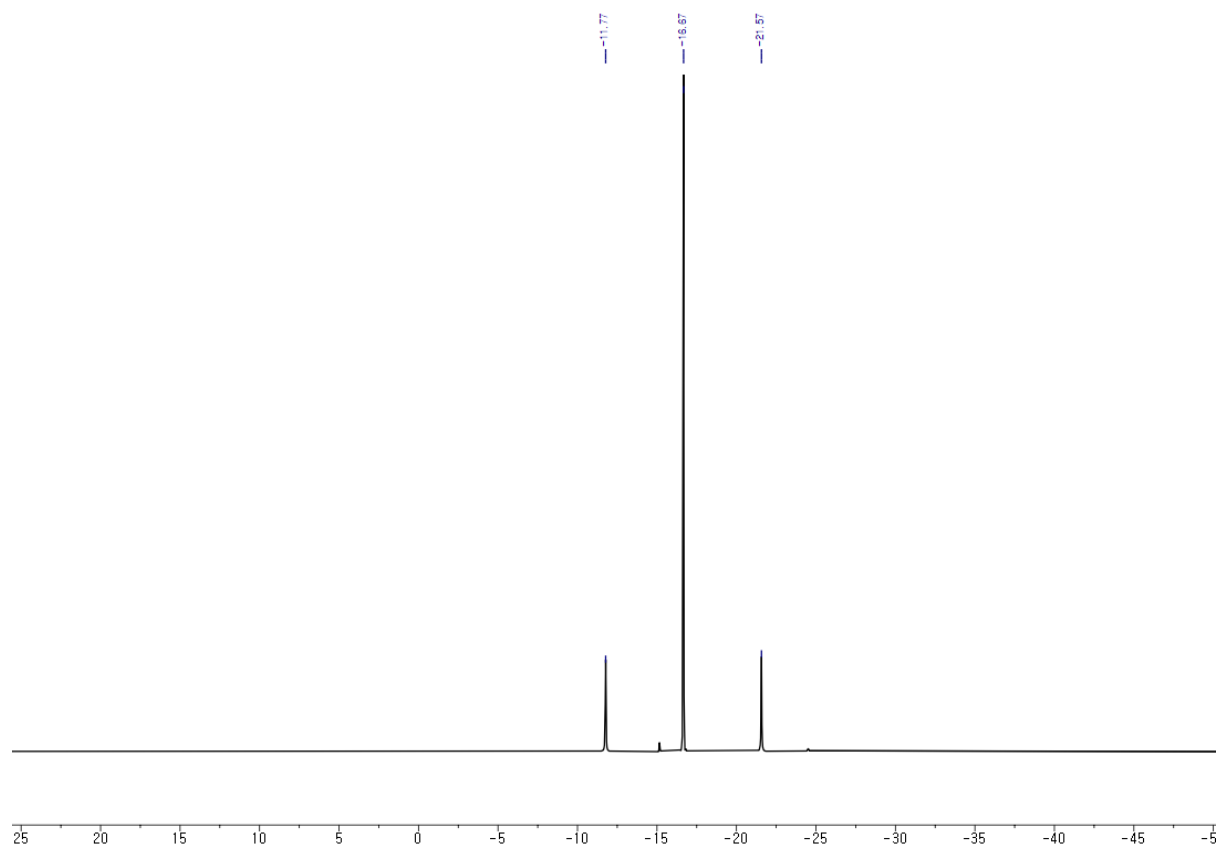

Figure S24.  $^{31}\text{P}$  NMR spectrum of **8** (243 MHz,  $\text{CDCl}_3$ , 300 K)

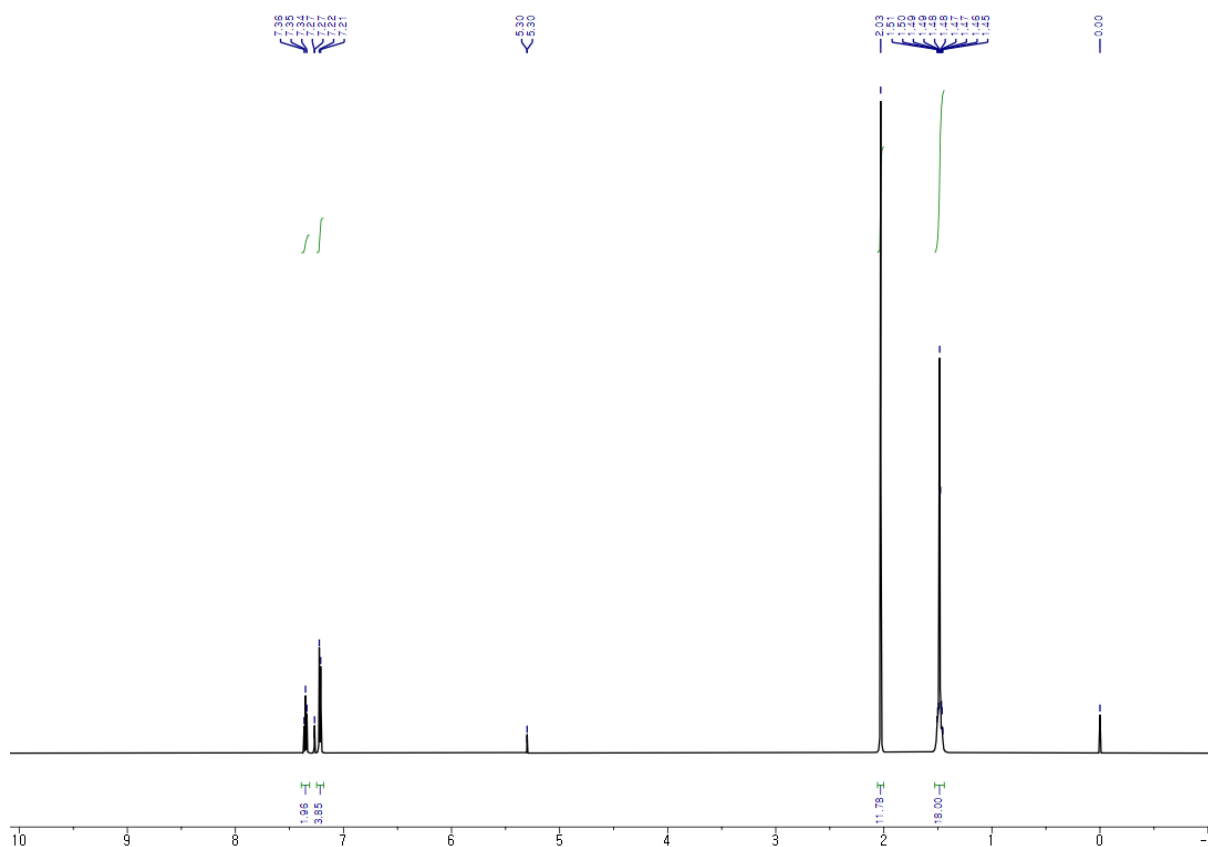

**Figure S25.**  $^1\text{H}$  NMR spectrum of **9** (600 MHz,  $\text{CDCl}_3$ , 300 K)

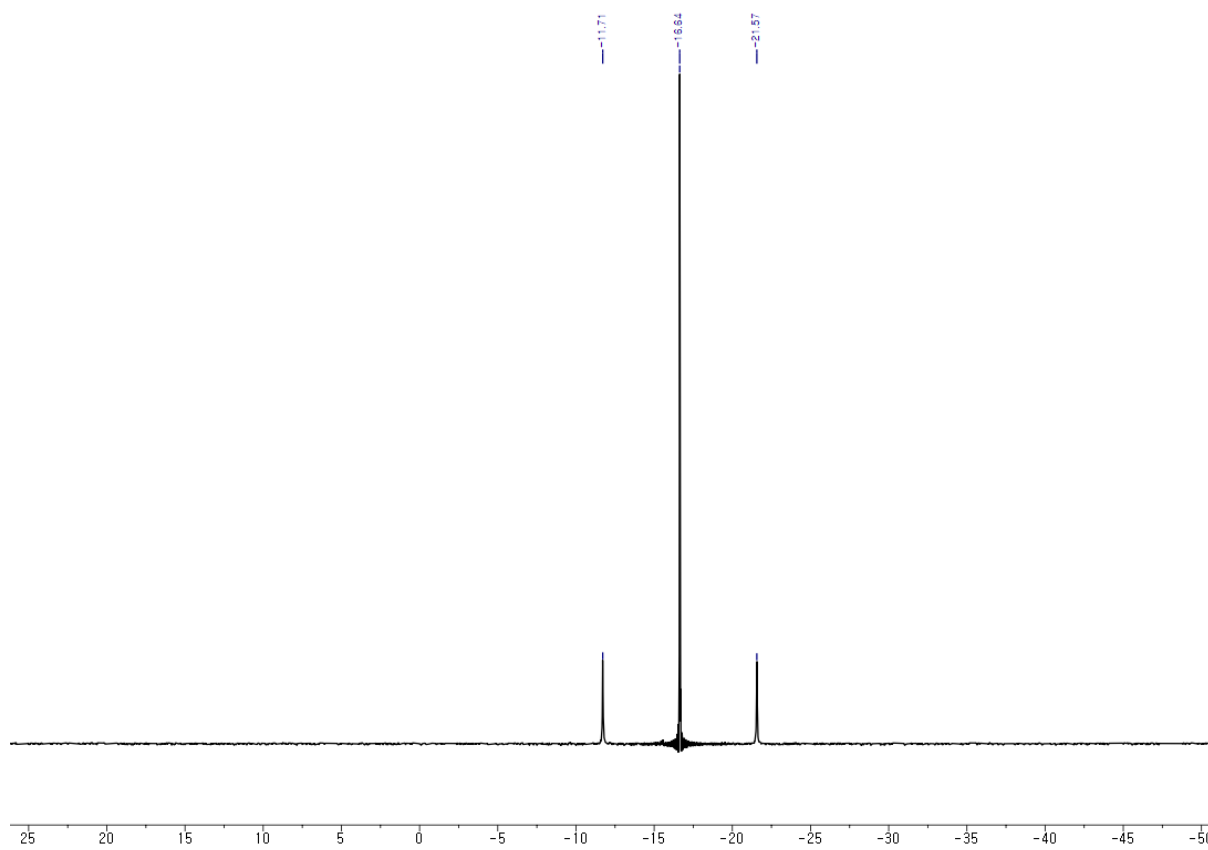

**Figure S26.**  $^{31}\text{P}$  NMR spectrum of **9** (243 MHz,  $\text{CDCl}_3$ , 300 K)

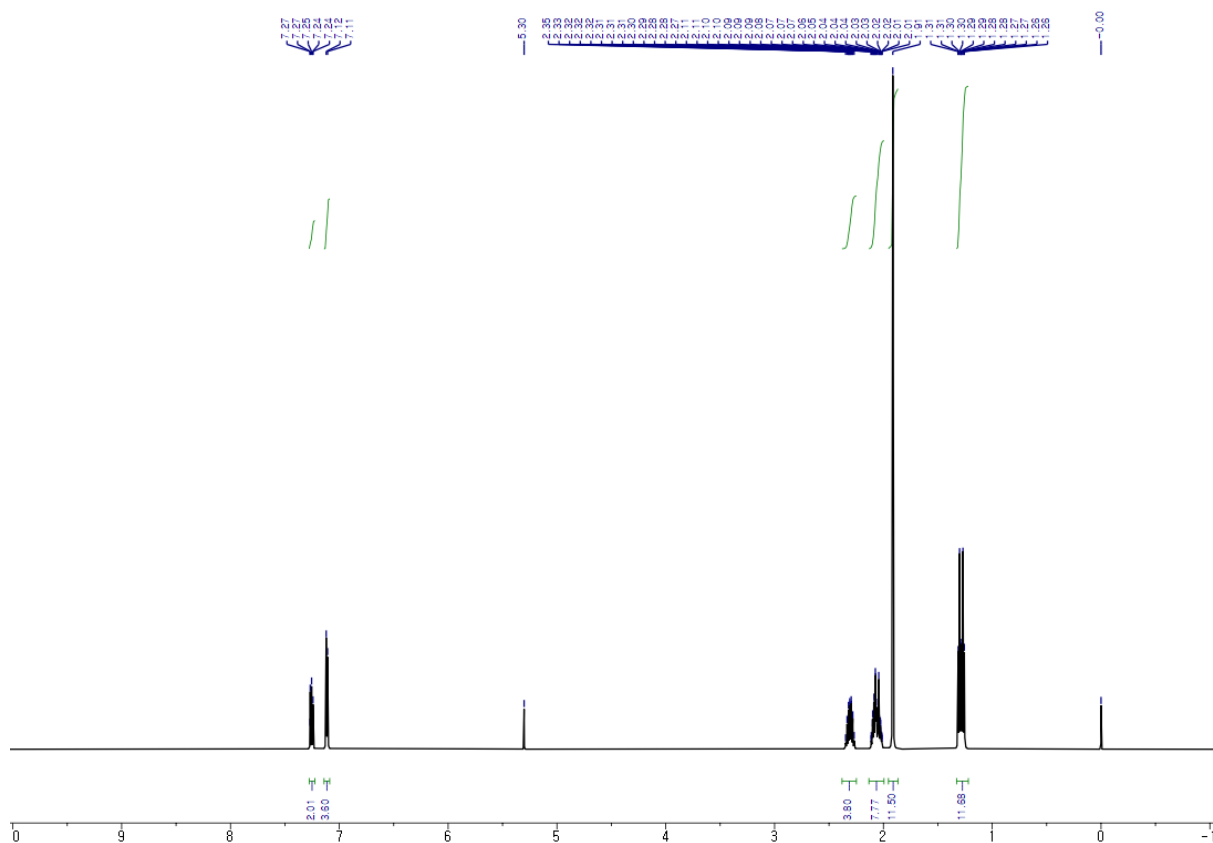

Figure S27.  $^1\text{H}$  NMR spectrum of **10** (600 MHz,  $\text{CDCl}_3$ , 300 K)

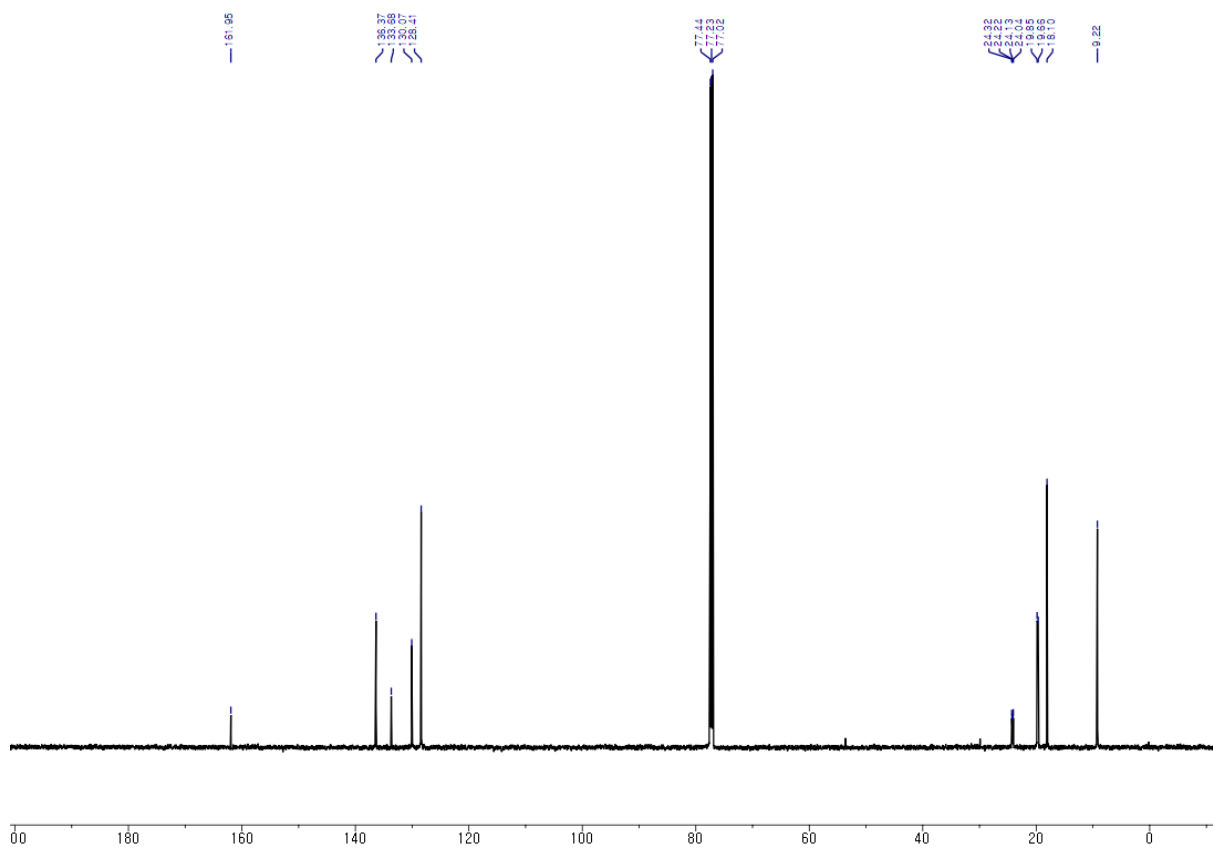

Figure S28.  $^{13}\text{C}$  NMR spectrum of **10** (151 MHz,  $\text{CDCl}_3$ , 300 K)

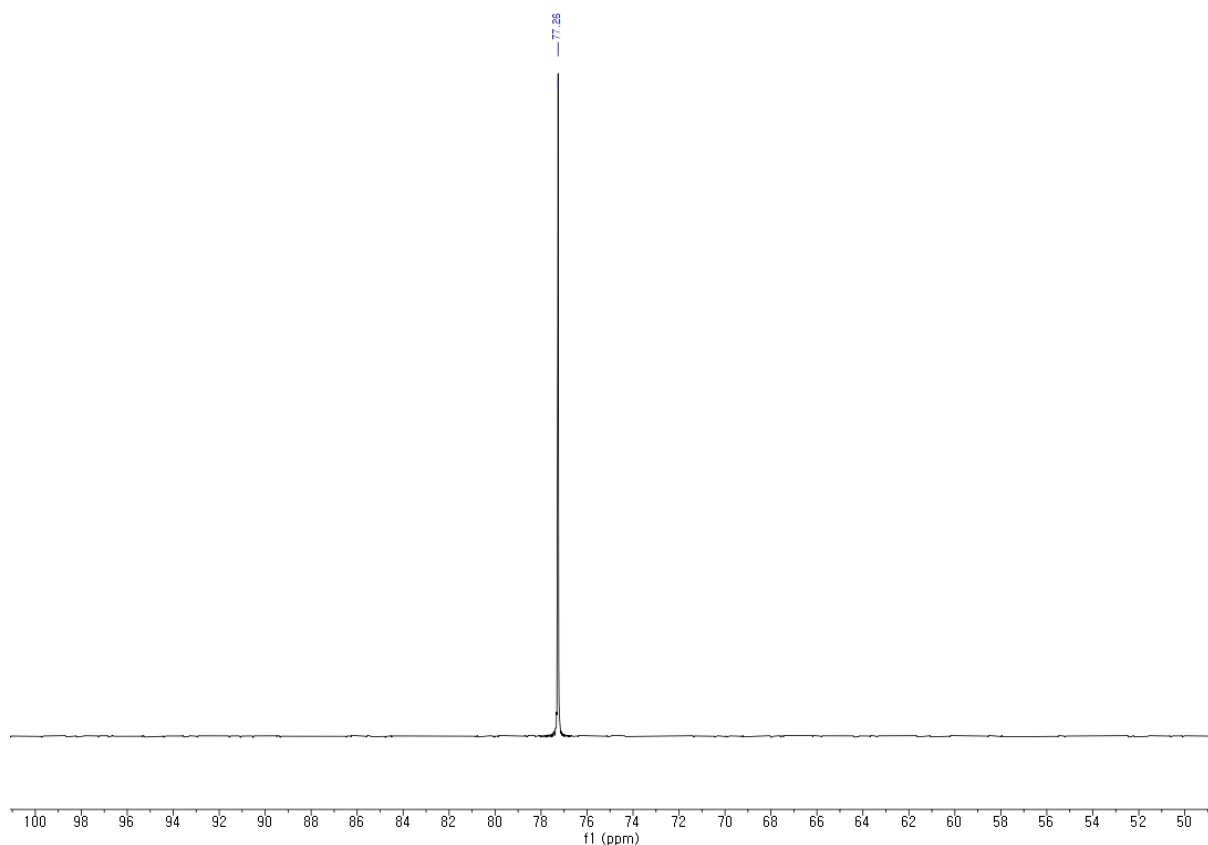

**Figure S29.** <sup>31</sup>P NMR spectrum of **10** (243 MHz, CDCl<sub>3</sub>, 300 K)

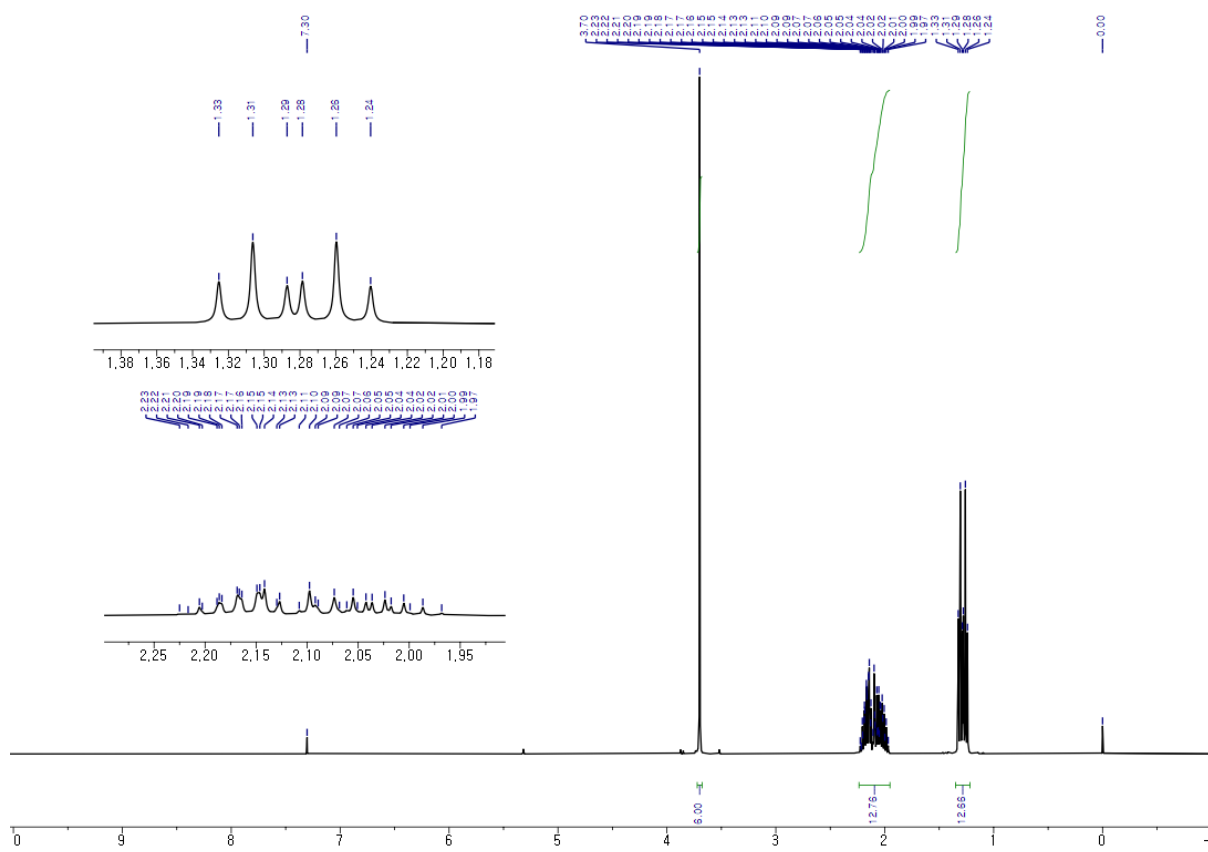

**Figure S30.** <sup>1</sup>H NMR spectrum of **11** (400 MHz, CDCl<sub>3</sub>, 300 K)

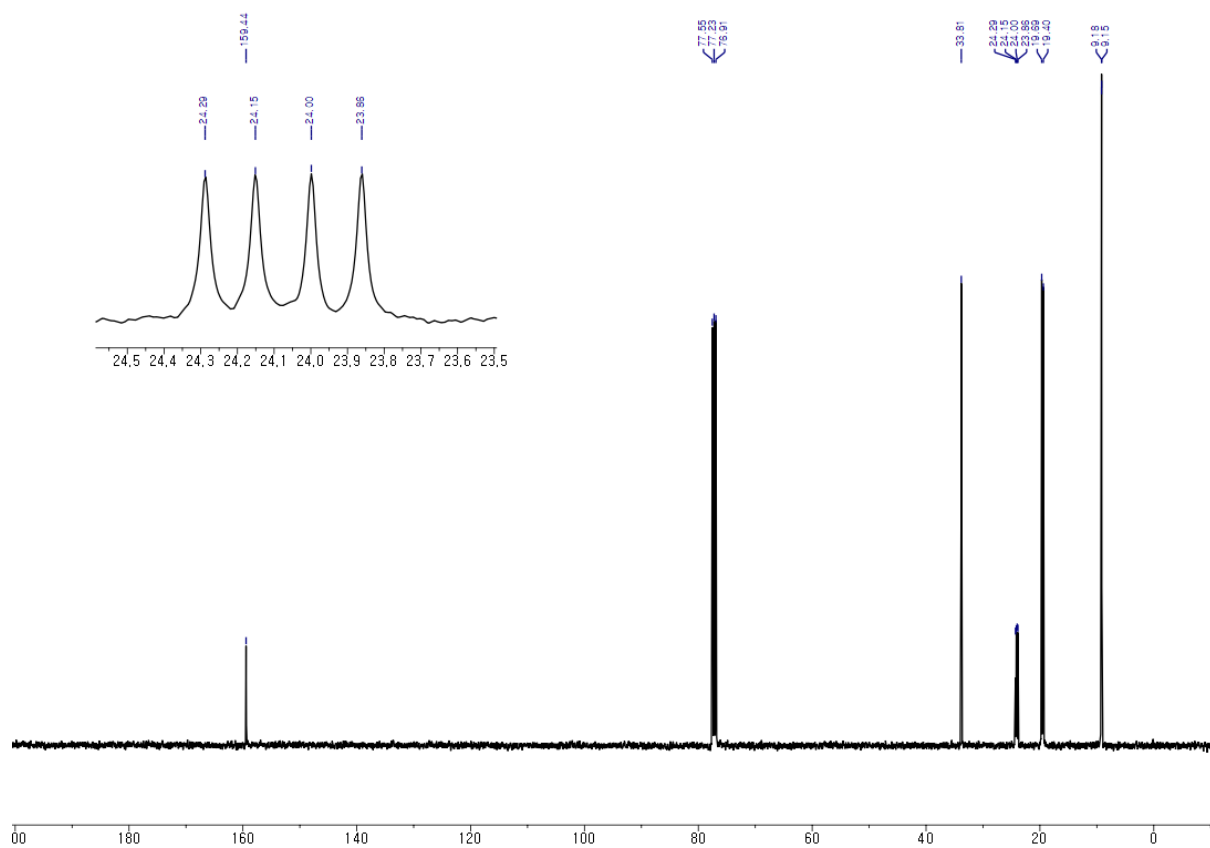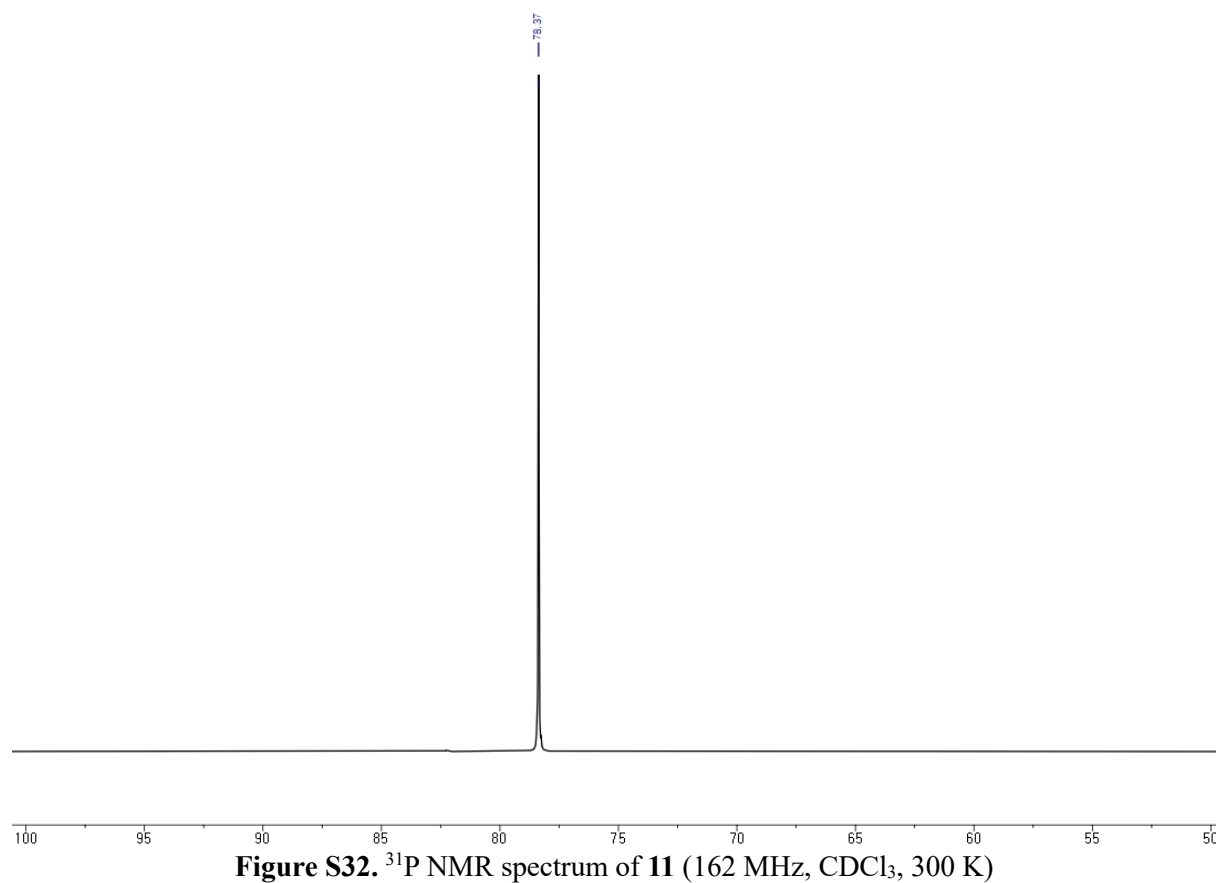

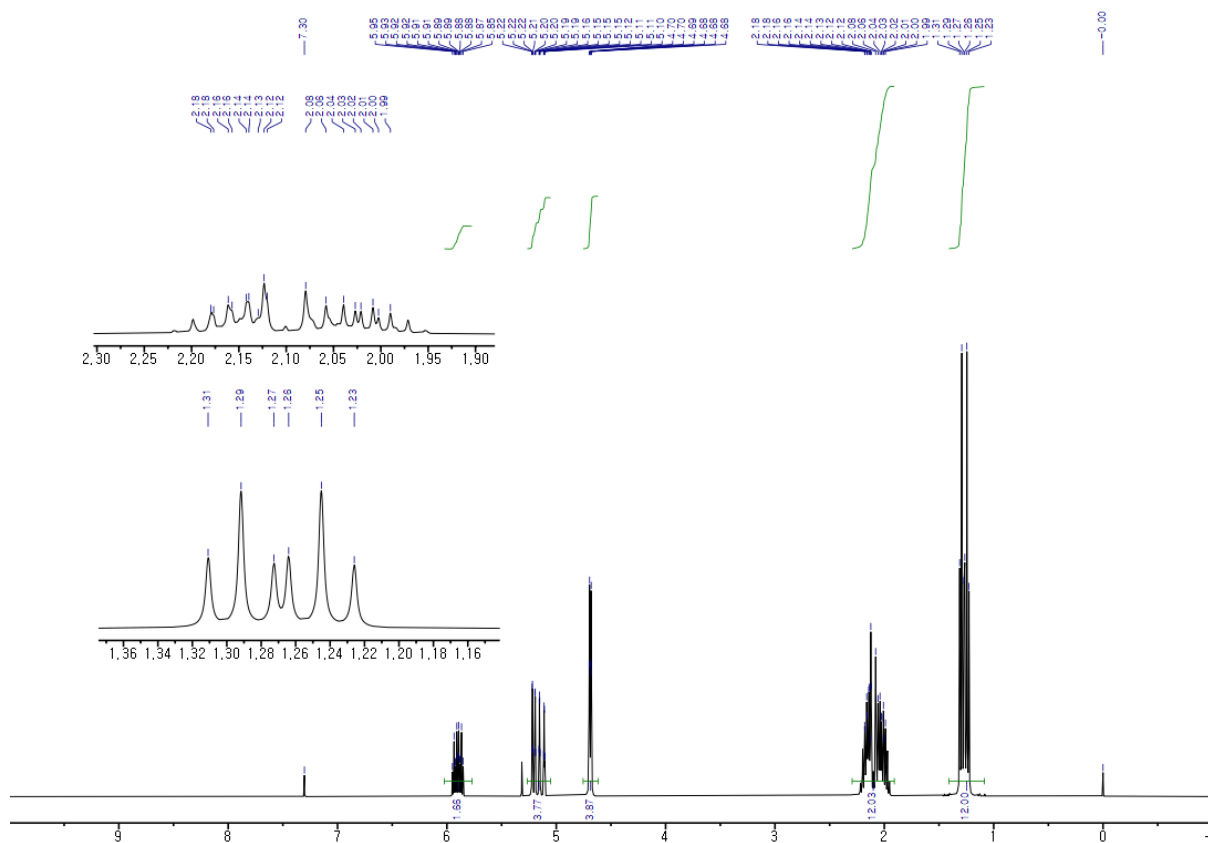

**Figure S33.**  $^1\text{H}$  NMR spectrum of **12** (400 MHz,  $\text{CDCl}_3$ , 300 K)

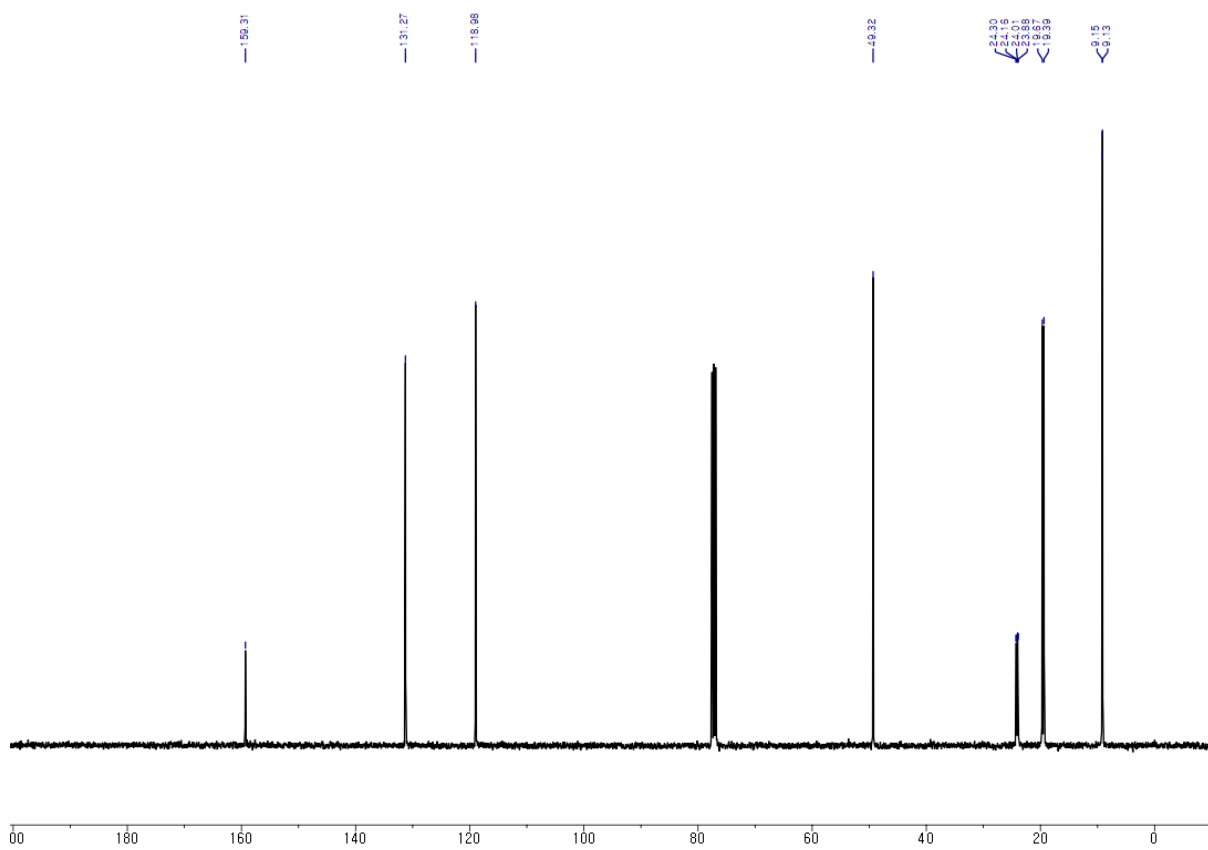

**Figure S34.**  $^{13}\text{C}$  NMR spectrum of **12** (101 MHz,  $\text{CDCl}_3$ , 300 K)

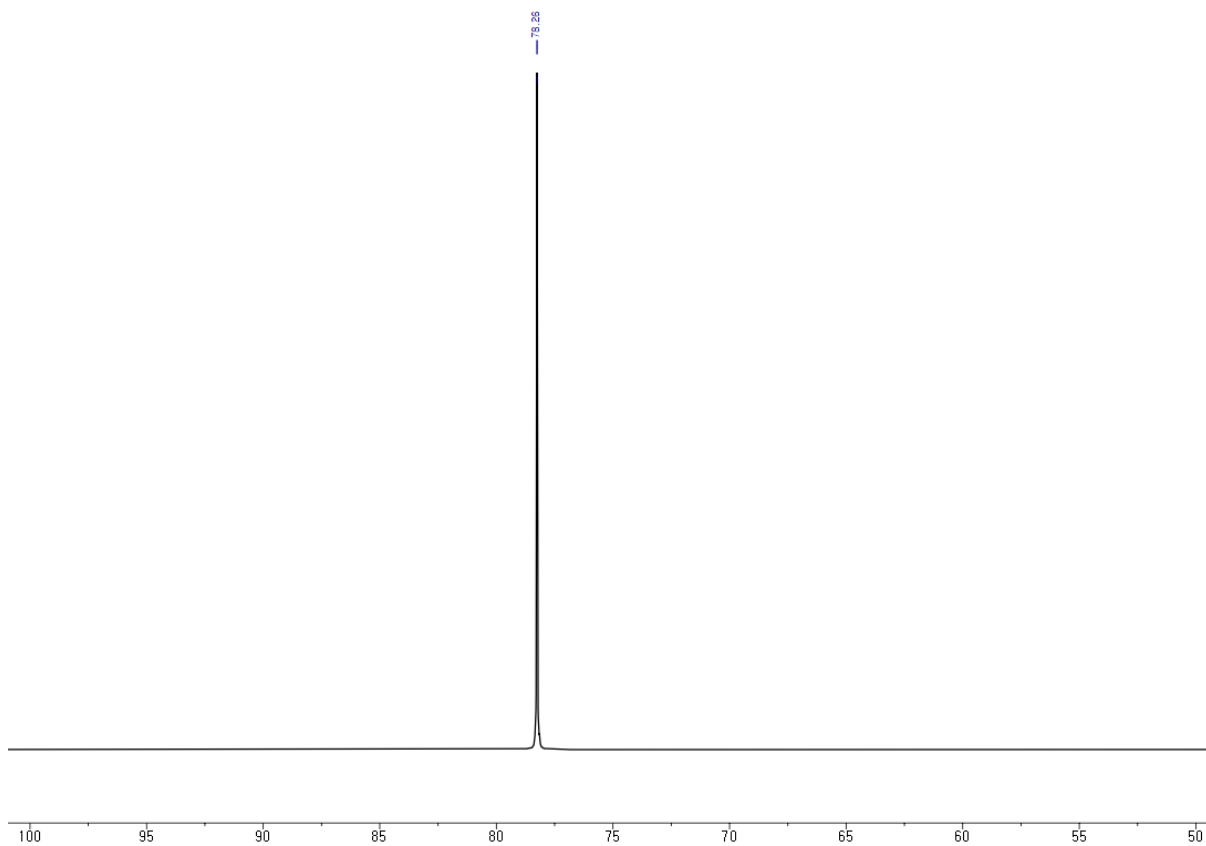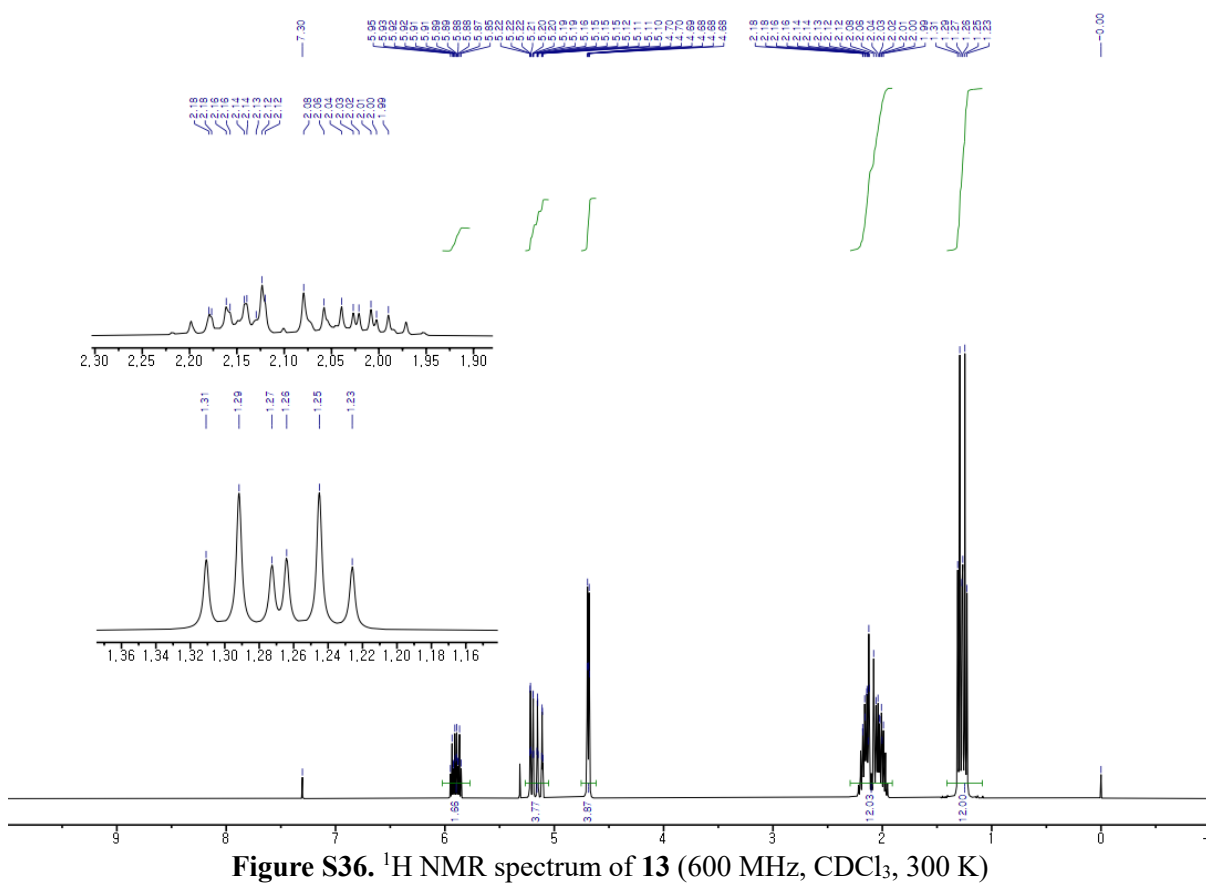

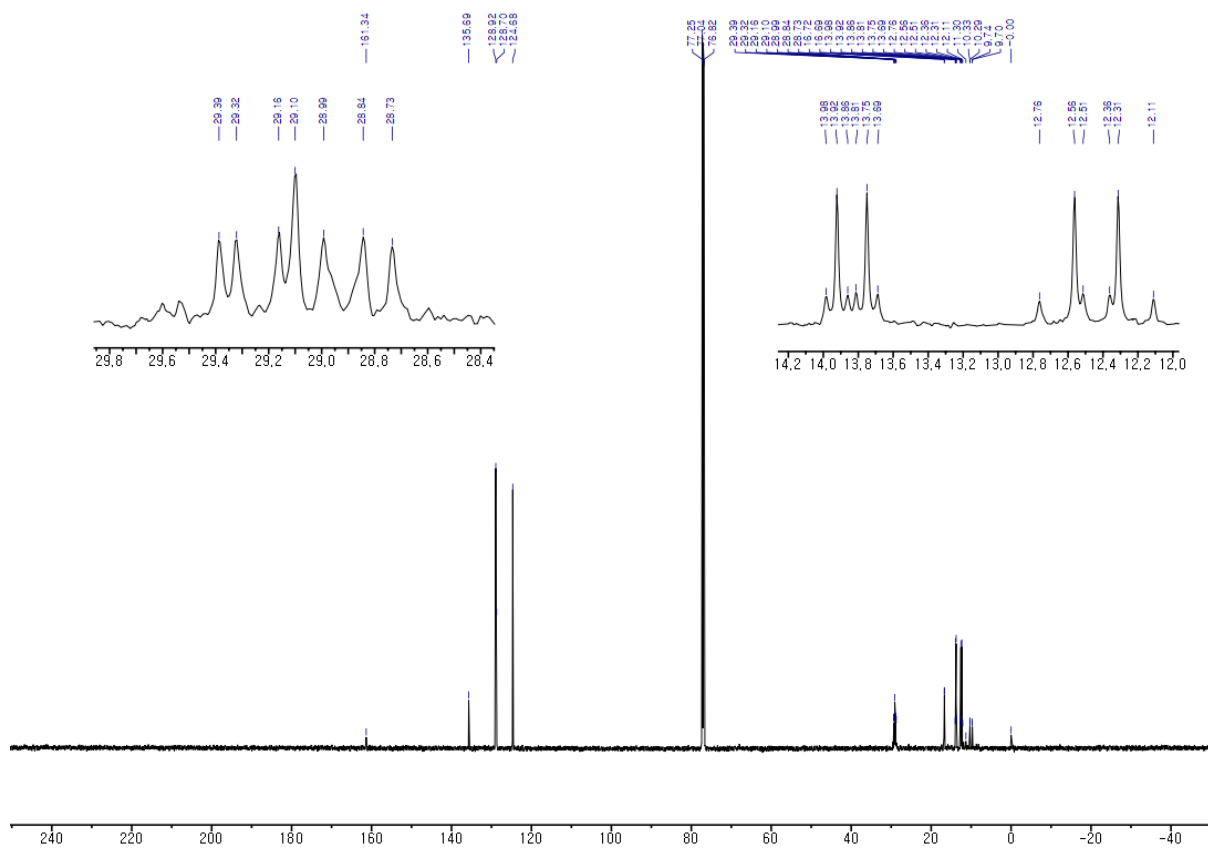

Figure S37.  $^{13}\text{C}$  NMR spectrum of **13** (151 MHz,  $\text{CDCl}_3$ , 300 K)

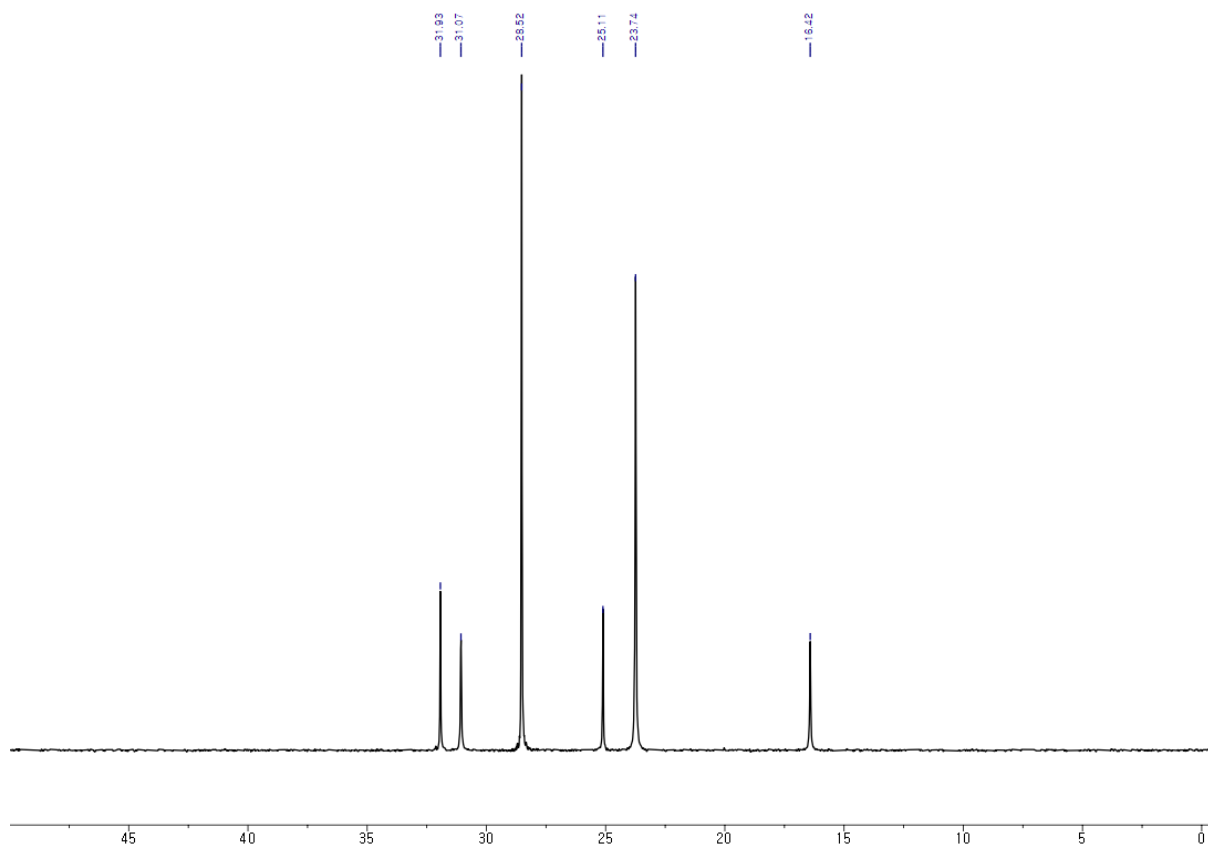

Figure S38.  $^{31}\text{P}$  NMR spectrum of **13** (243 MHz,  $\text{CDCl}_3$ , 300 K)



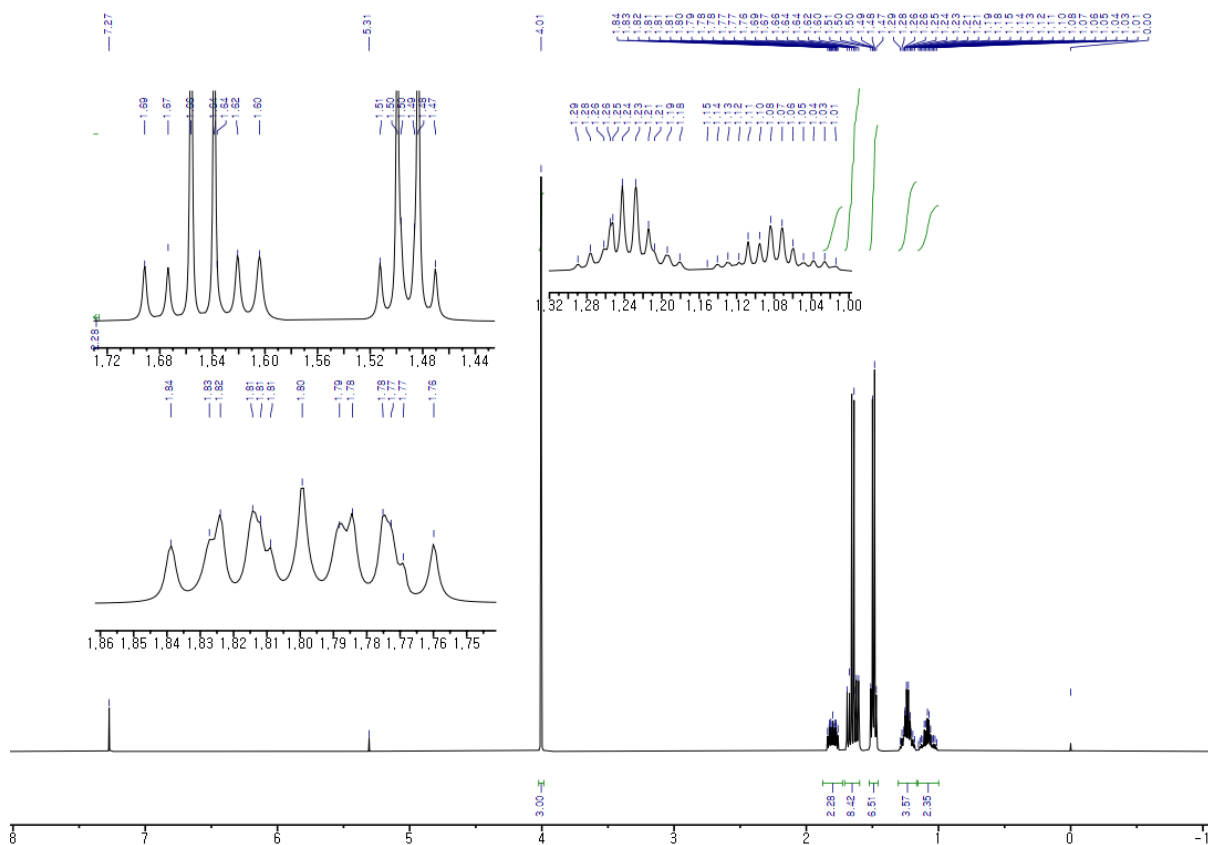

**Figure S39.**  $^1\text{H}$  NMR spectrum of **14** (600 MHz,  $\text{CDCl}_3$ , 300 K)

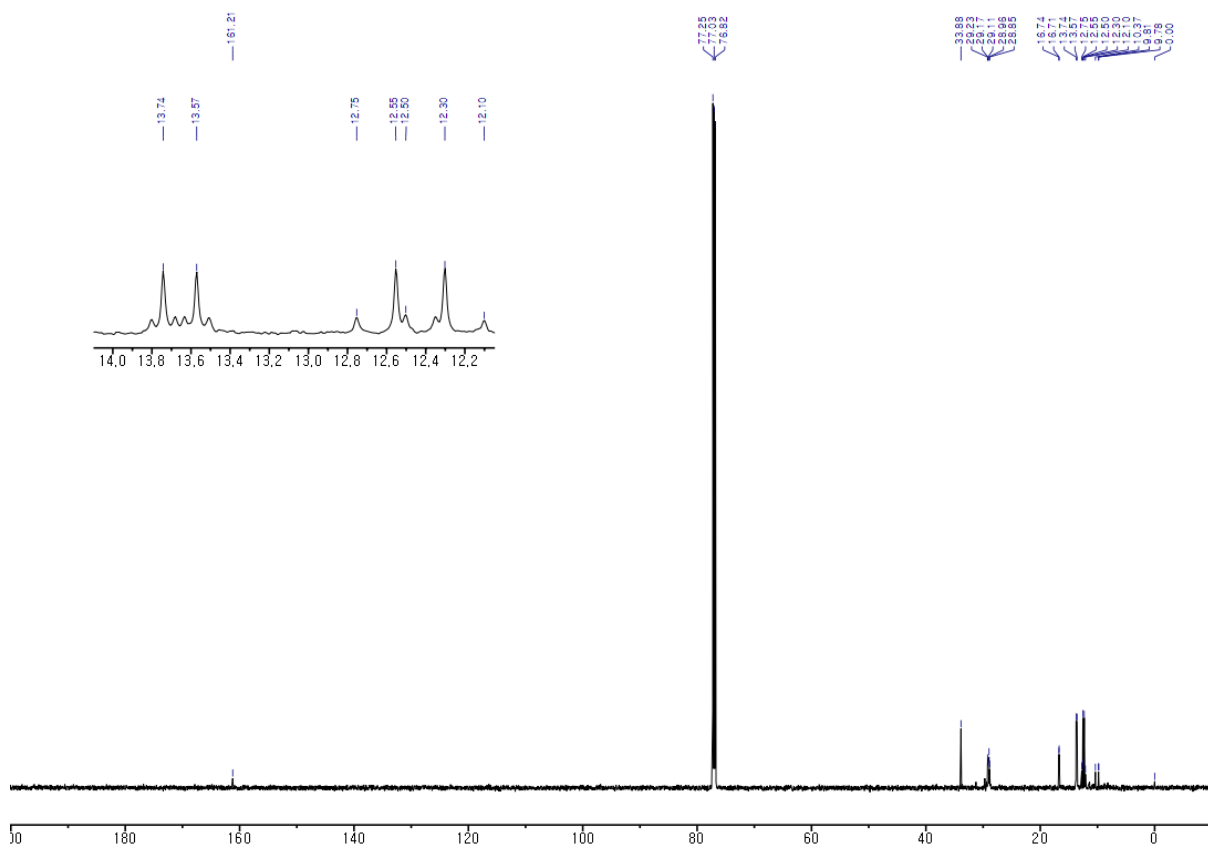

**Figure S40.**  $^{13}\text{C}$  NMR spectrum of **14** (151 MHz,  $\text{CDCl}_3$ , 300 K)

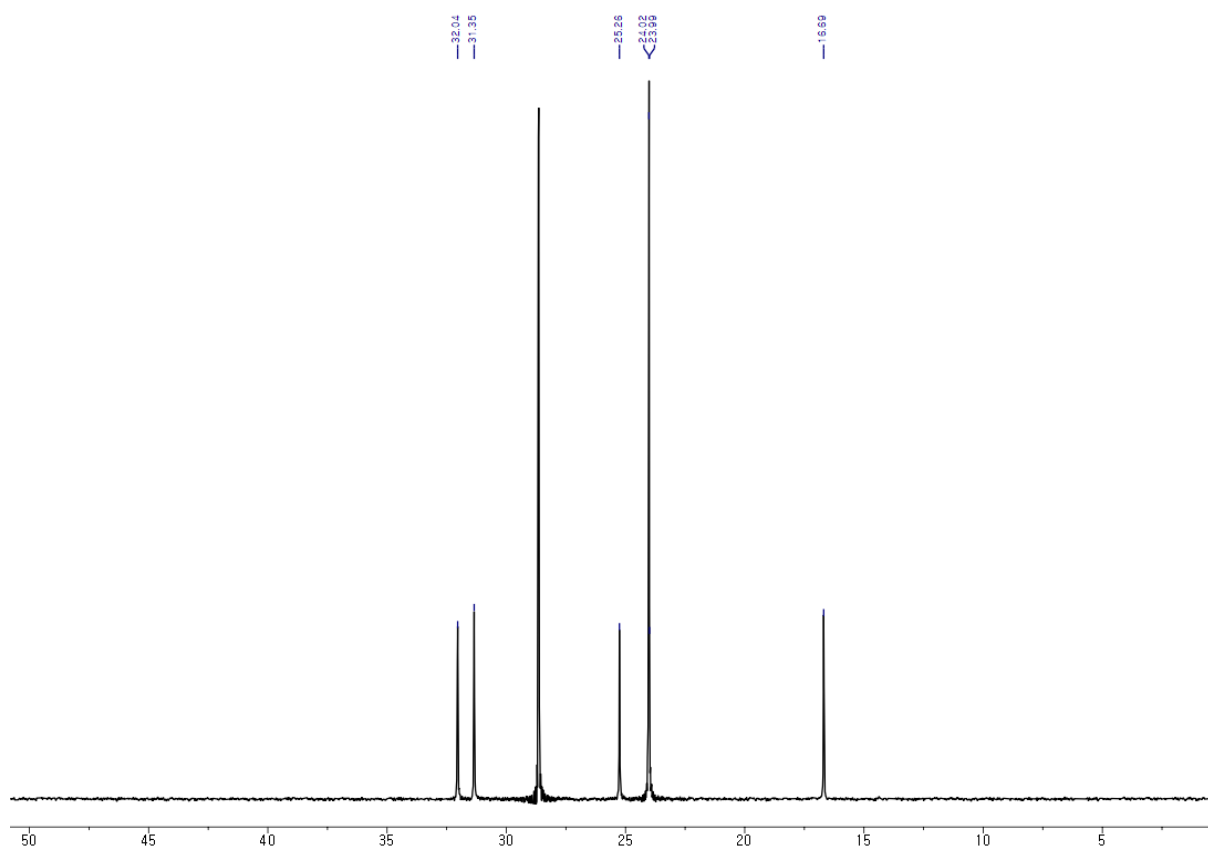

Figure S41.  $^{31}\text{P}$  NMR spectrum of **14** (243 MHz,  $\text{CDCl}_3$ , 300 K)

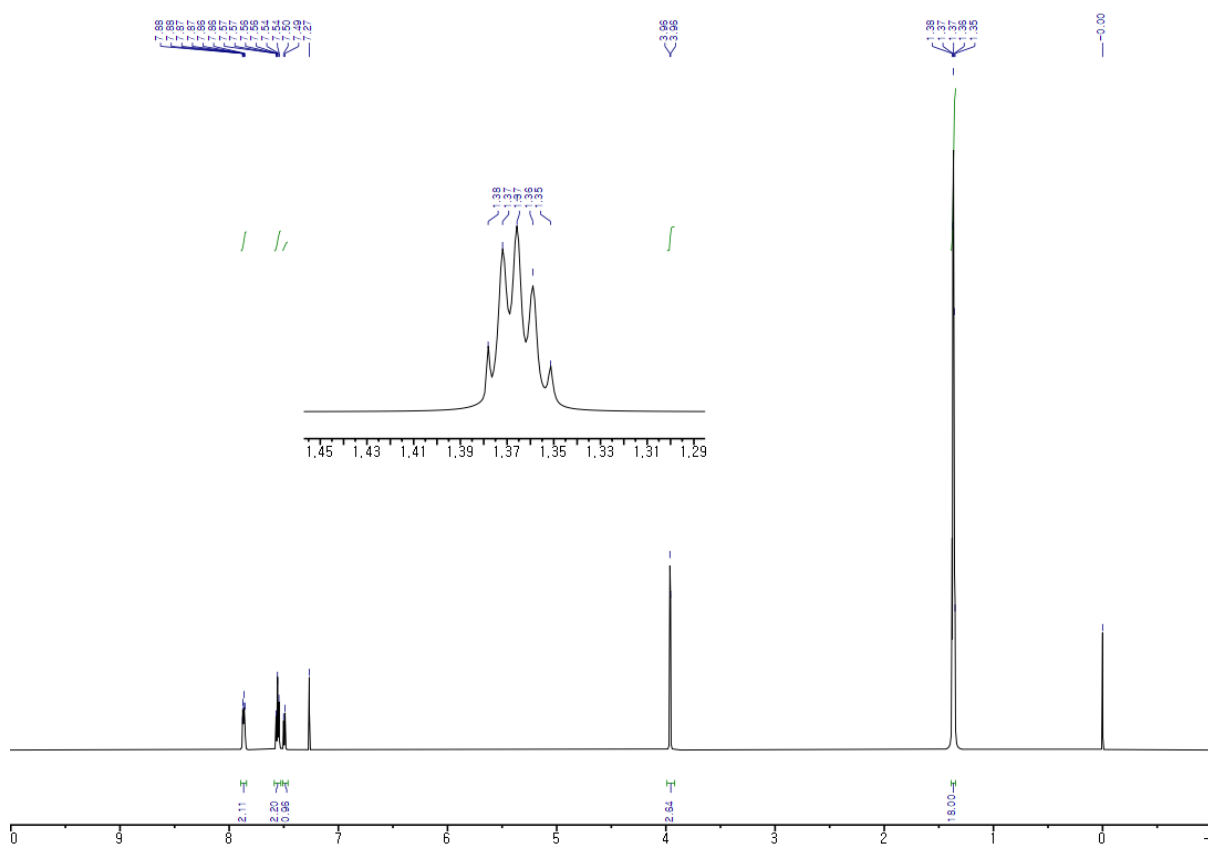

Figure S42.  $^1\text{H}$  NMR spectrum of **15** (600 MHz,  $\text{CDCl}_3$ , 300 K)

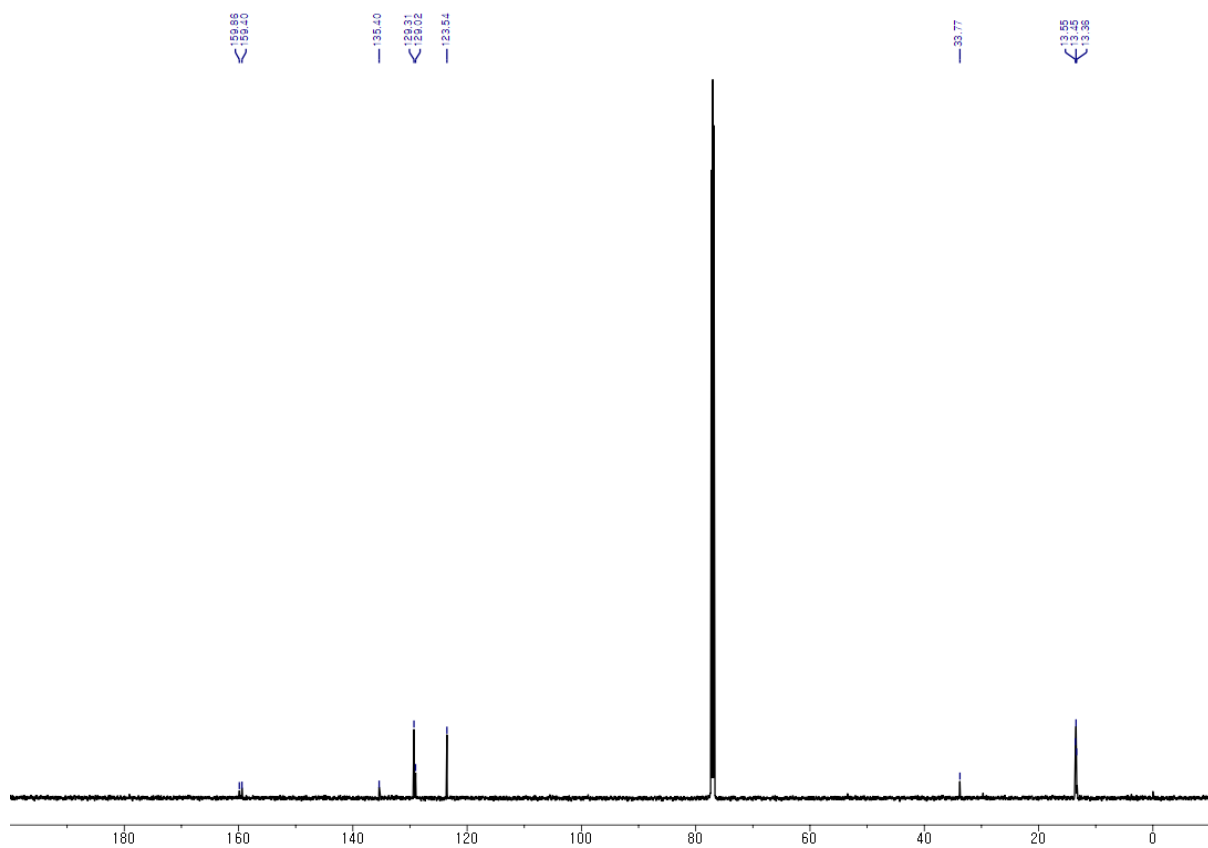

Figure S43.  $^{13}\text{C}$  NMR spectrum of **15** (151 MHz,  $\text{CDCl}_3$ , 300 K)

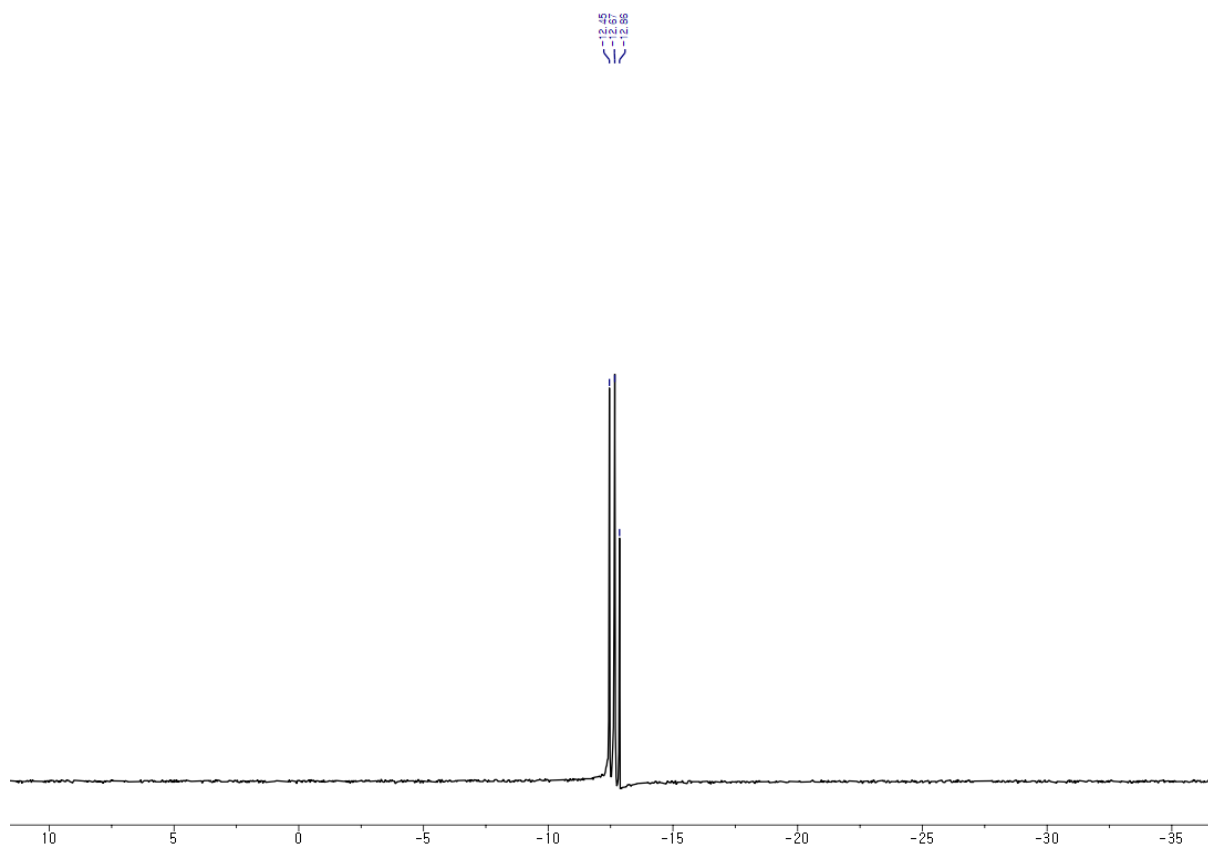

Figure S44.  $^{31}\text{P}$  NMR spectrum of **15** (243 MHz,  $\text{CDCl}_3$ , 300 K)

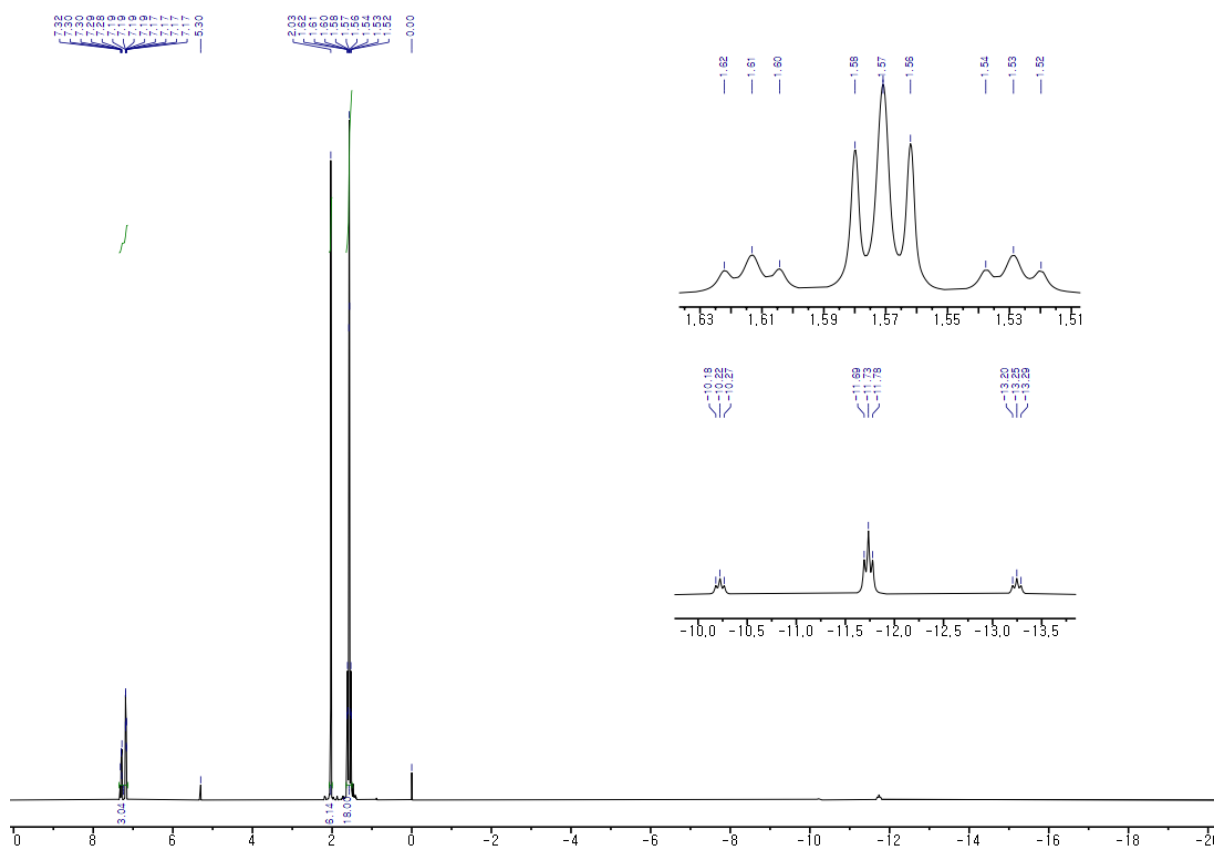

Figure S45.  $^1\text{H}$  NMR spectrum of **16** (400 MHz,  $\text{CDCl}_3$ , 300 K)

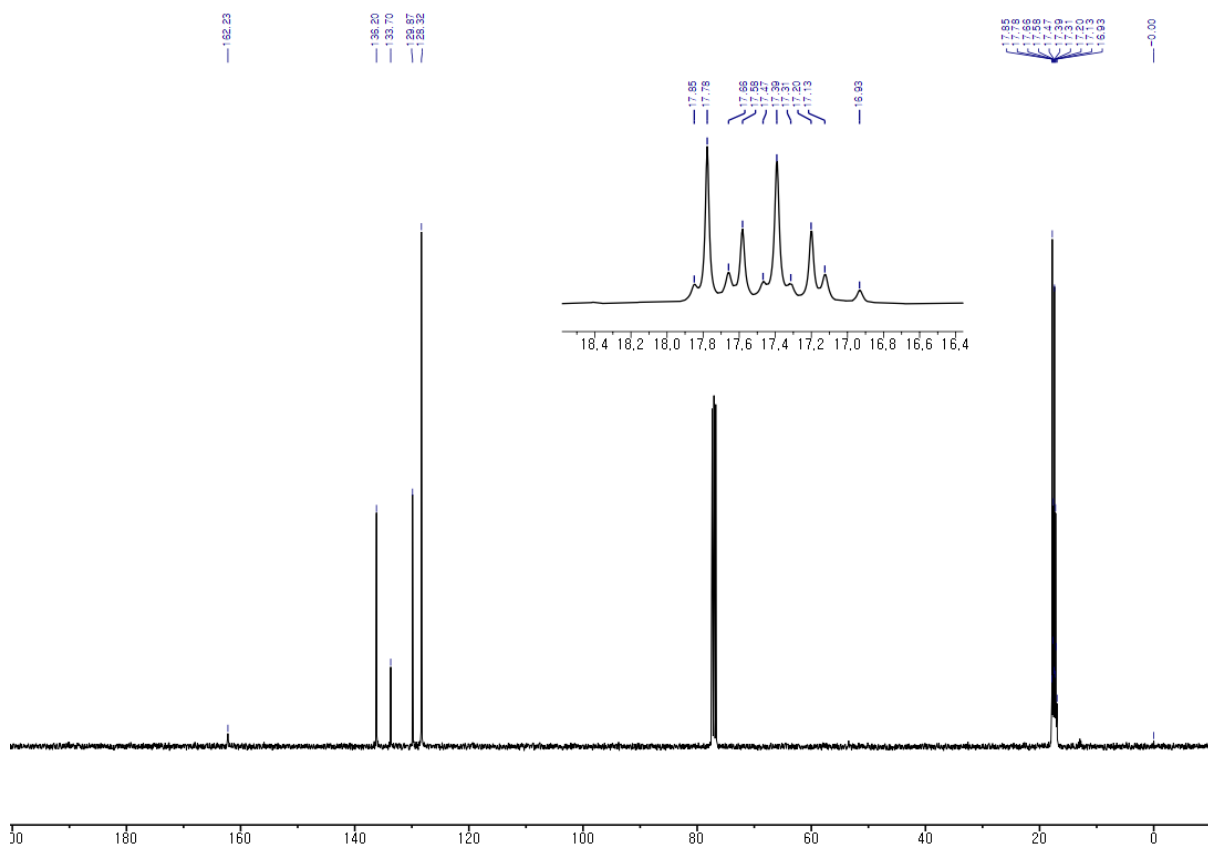

Figure S46.  $^{13}\text{C}$  NMR spectrum of **16** (101 MHz,  $\text{CDCl}_3$ , 300 K)

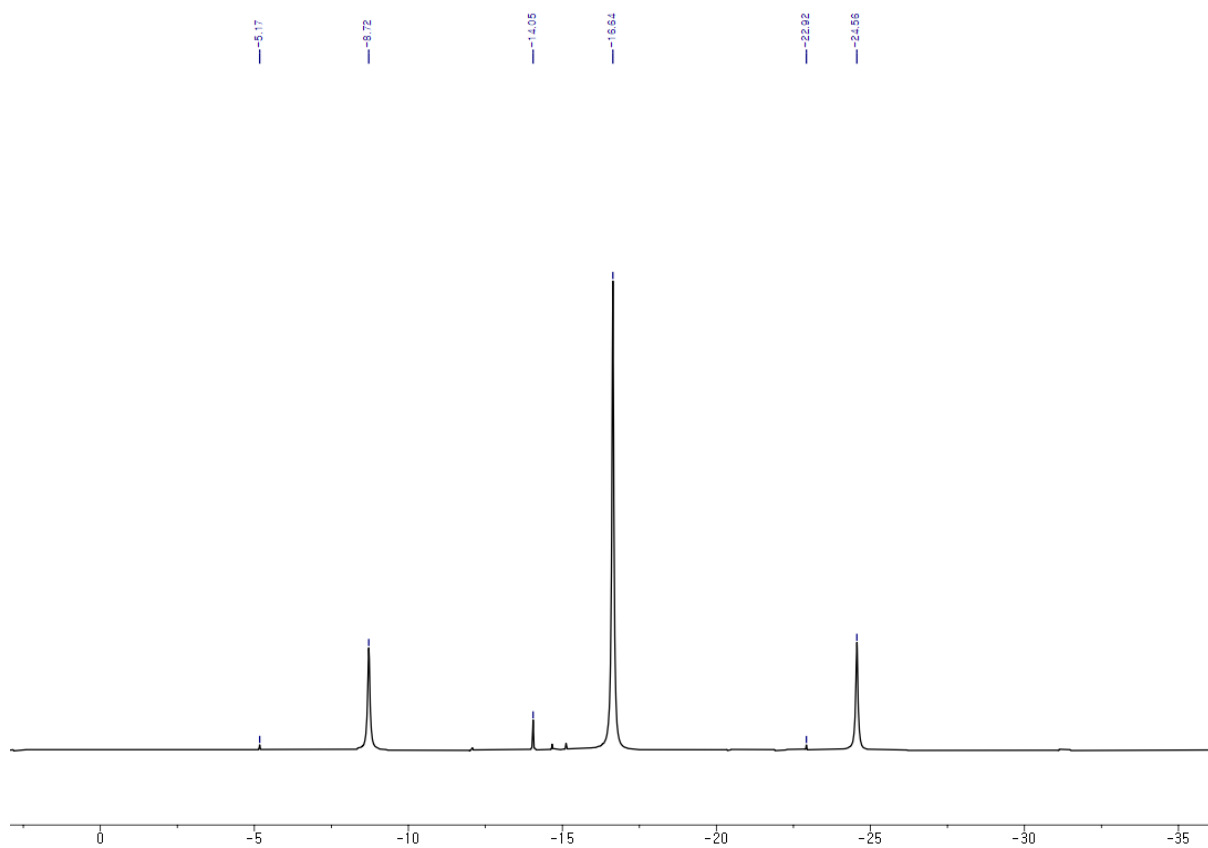

Figure S47.  $^{31}\text{P}$  NMR spectrum of **16** (162 MHz,  $\text{CDCl}_3$ , 300 K)

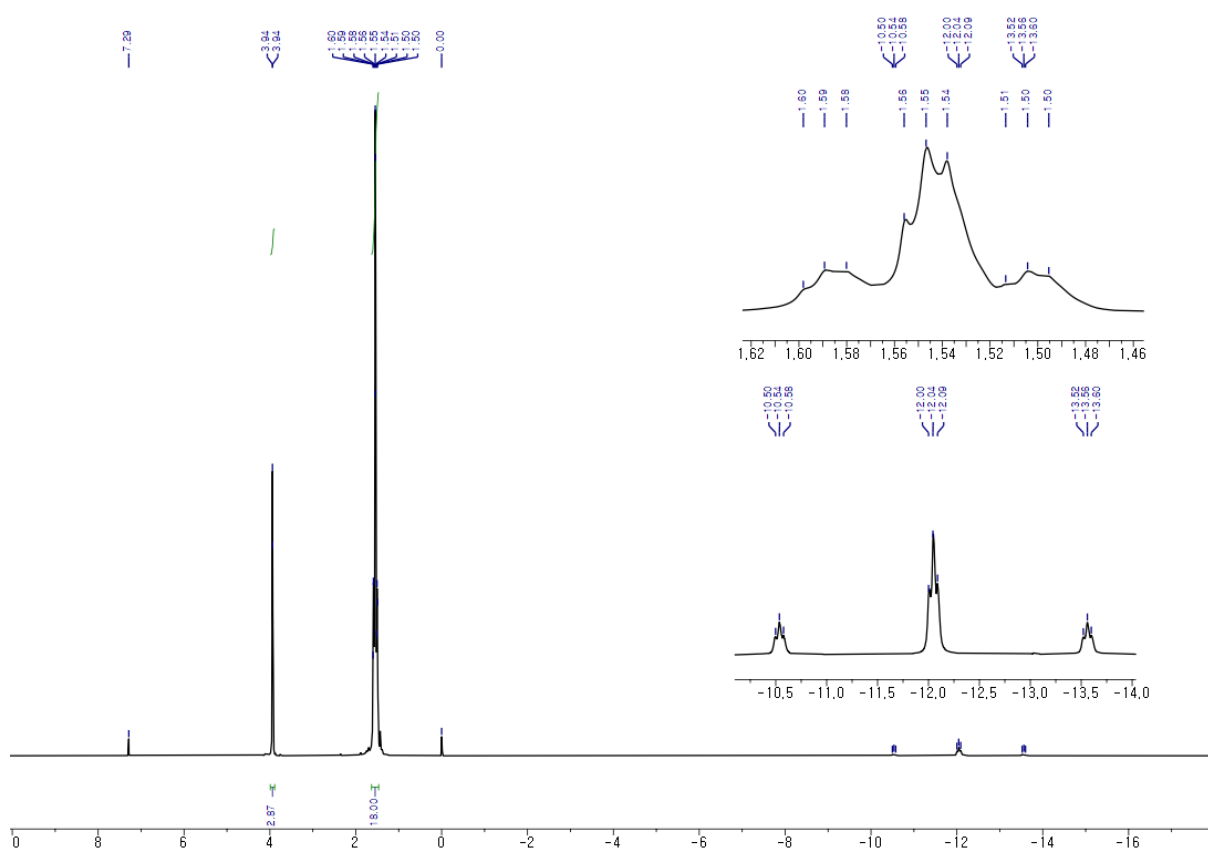

Figure S48.  $^1\text{H}$  NMR spectrum of **17** (400 MHz,  $\text{CDCl}_3$ , 300 K)

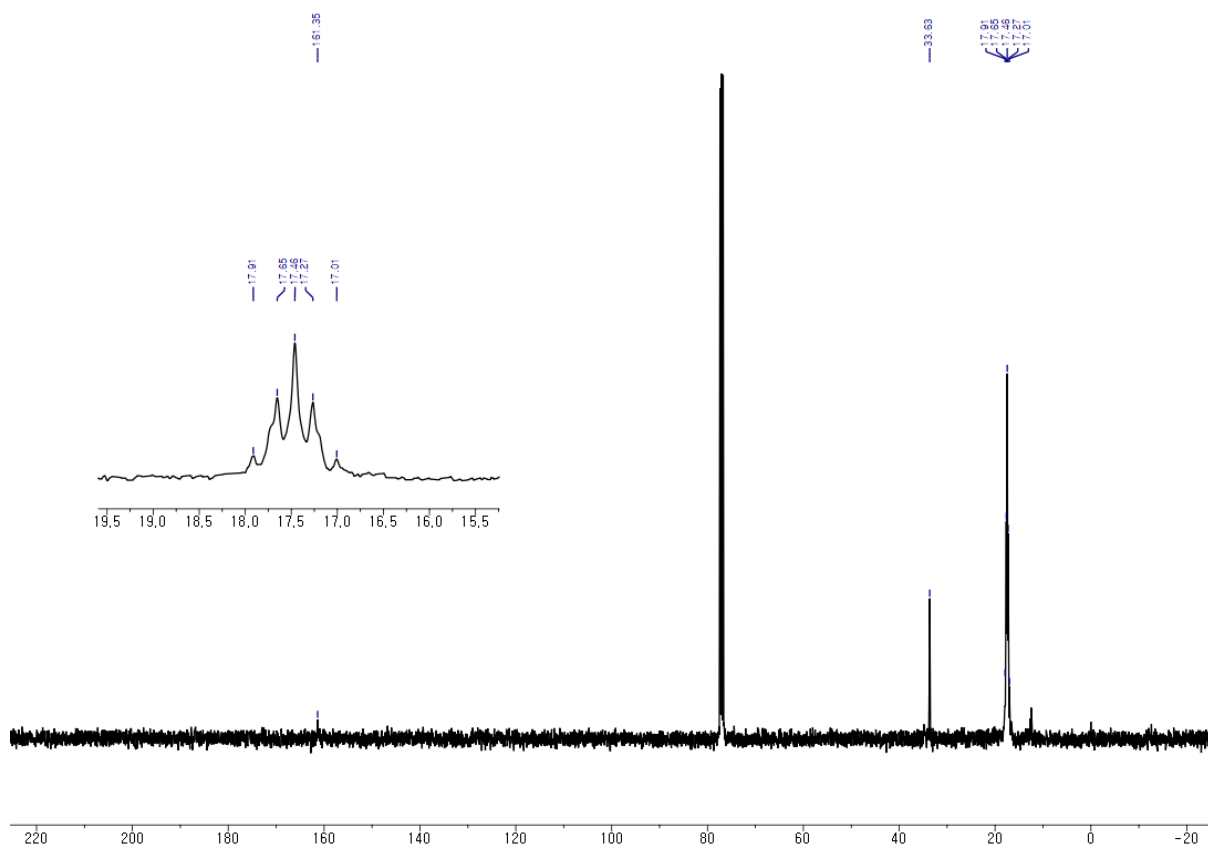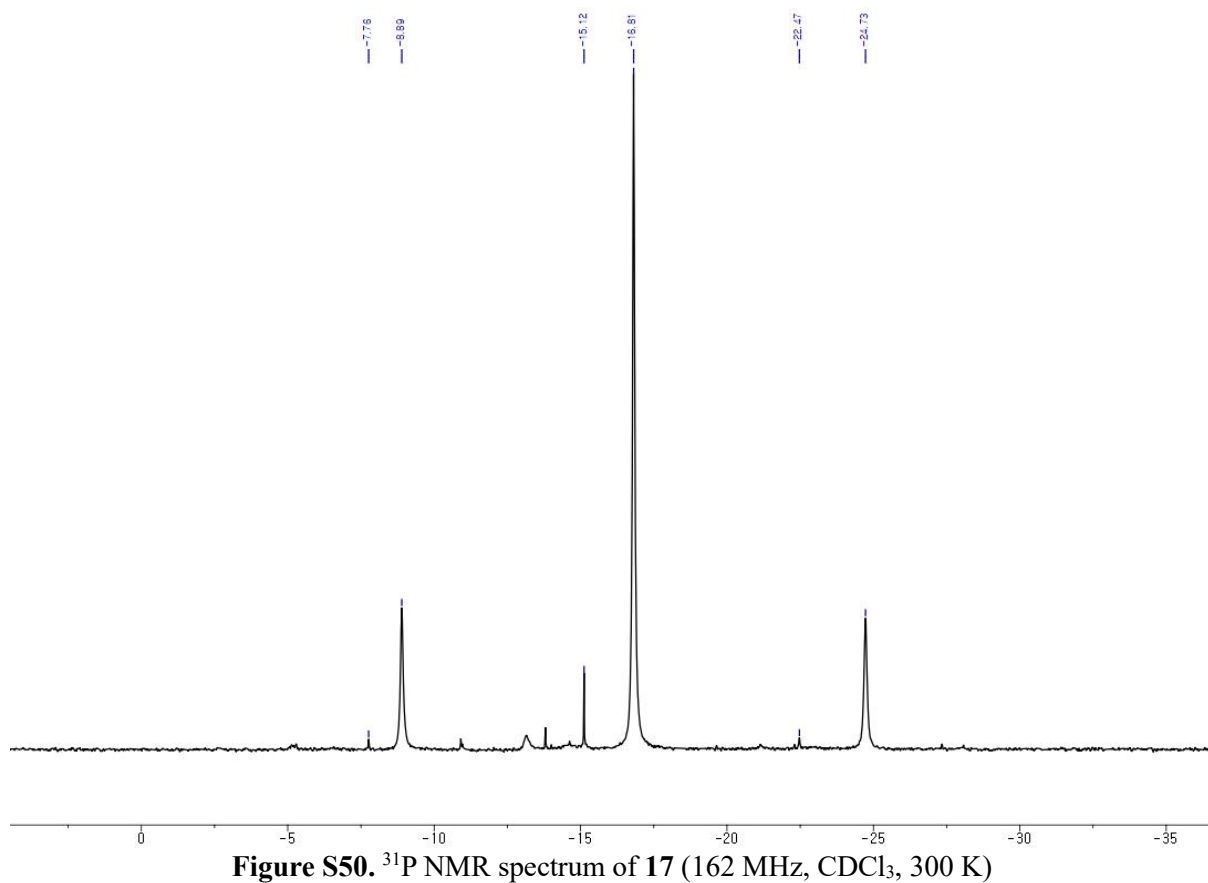

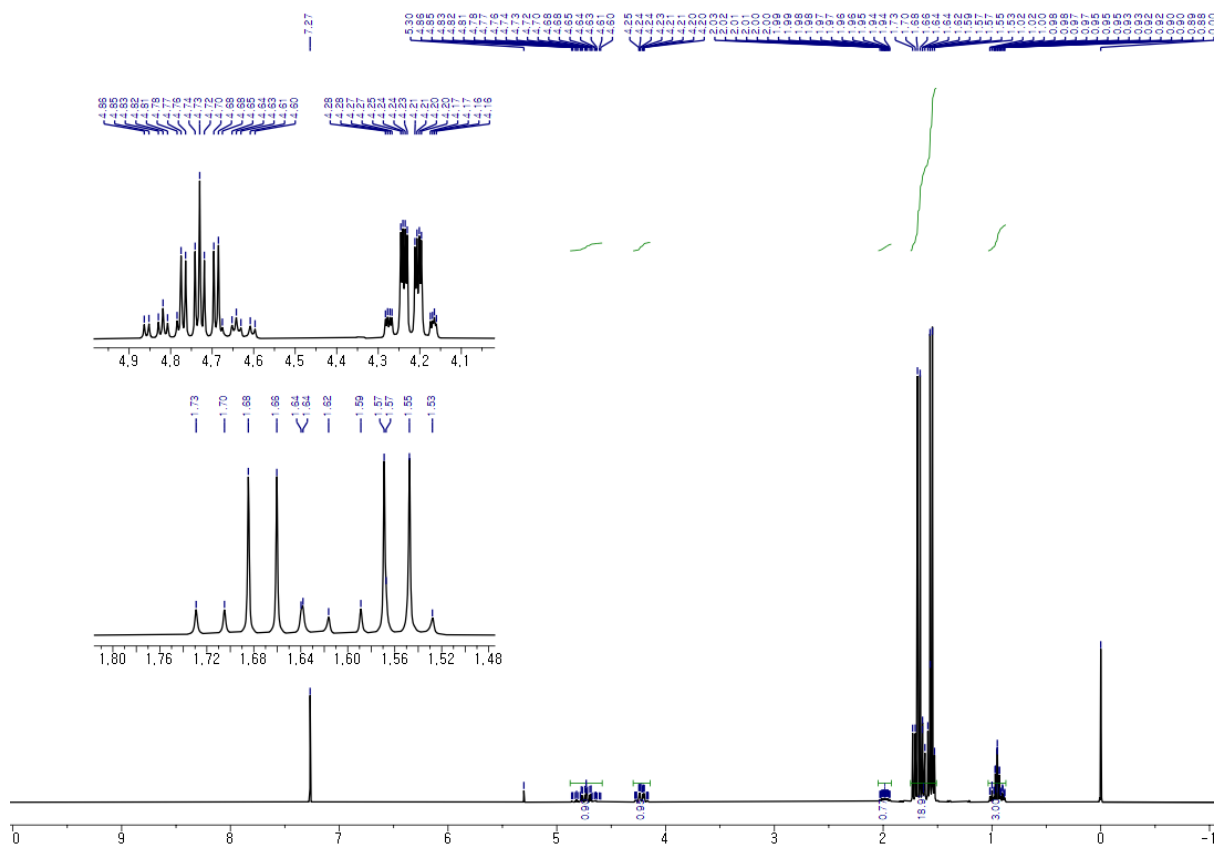

Figure S51.  $^1\text{H}$  NMR spectrum of **18** (400 MHz,  $\text{CDCl}_3$ , 300 K)

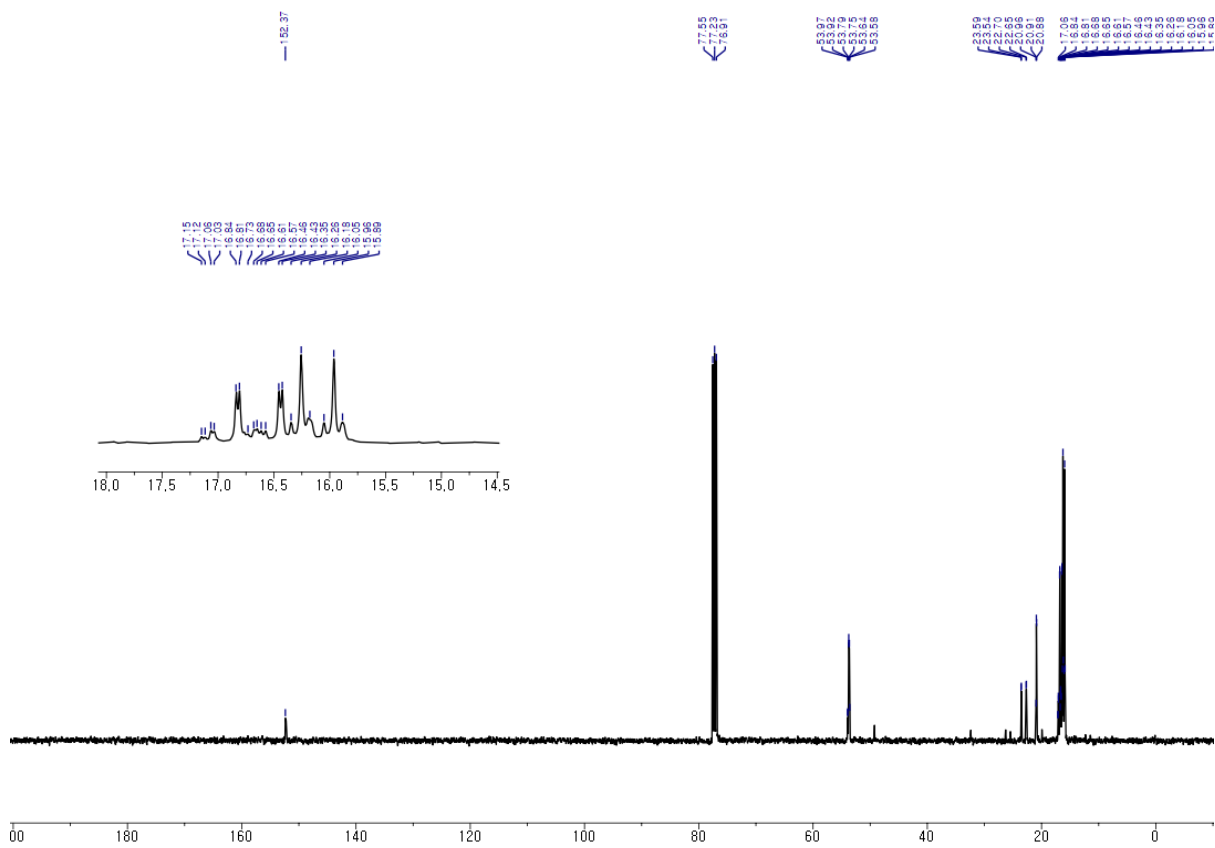

Figure S52.  $^{13}\text{C}$  NMR spectrum of **18** (101 MHz,  $\text{CDCl}_3$ , 300 K)

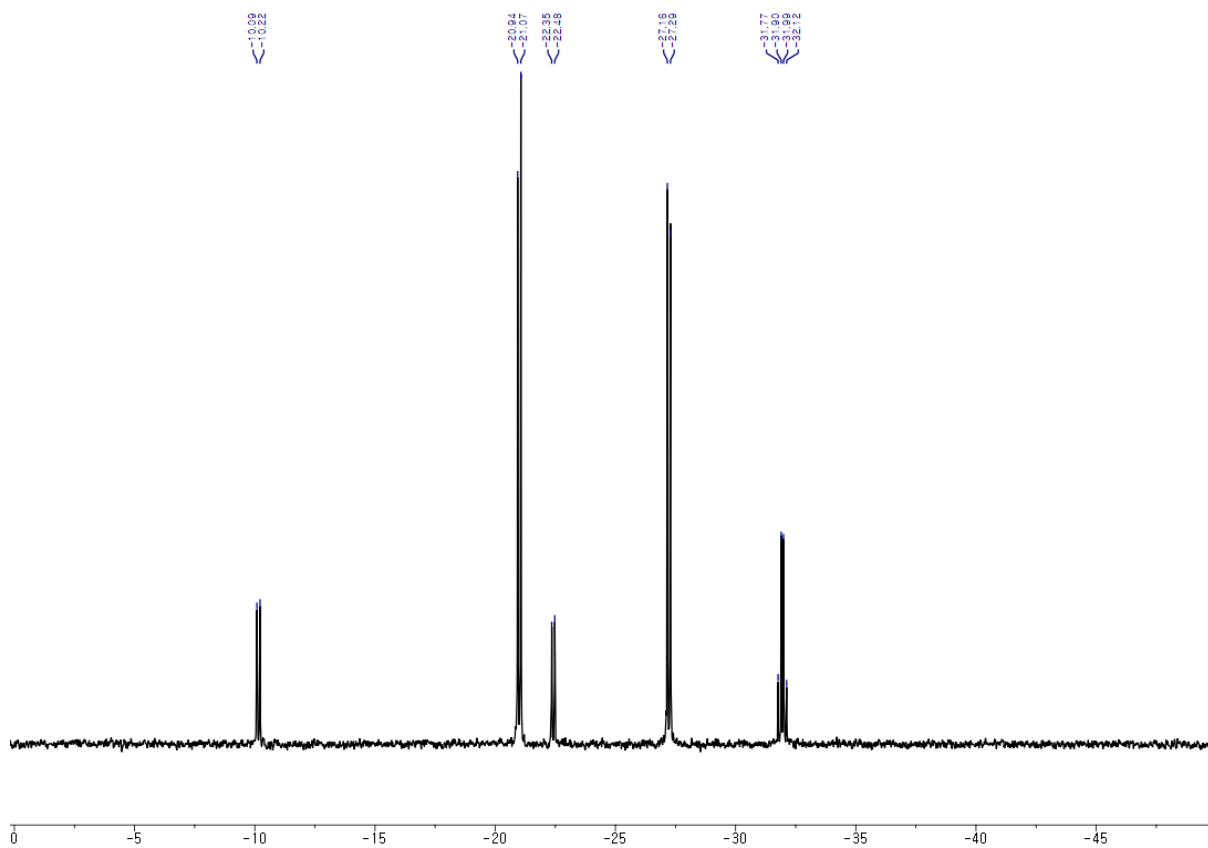

Figure S53.  $^{31}\text{P}$  NMR spectrum of **18** (162 MHz,  $\text{CDCl}_3$ , 300 K)

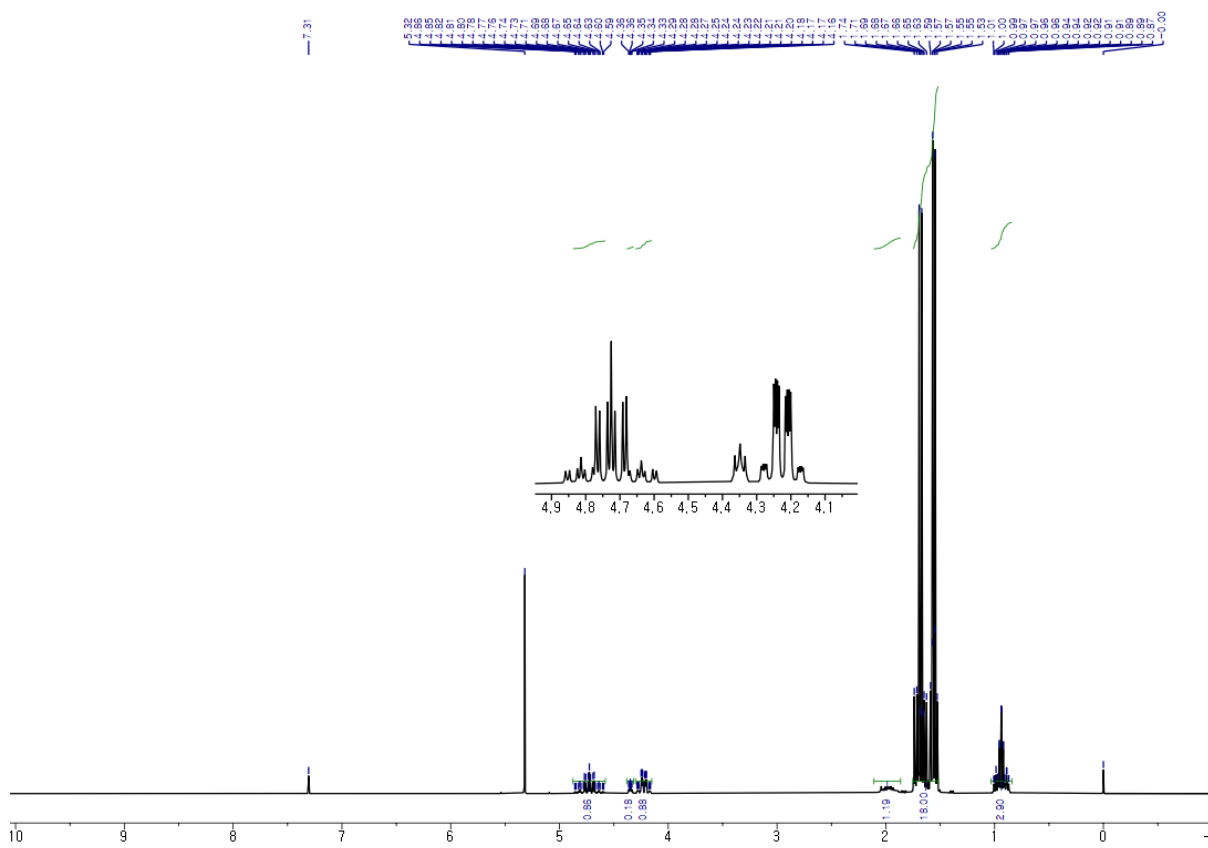

Figure S54.  $^1\text{H}$  NMR spectrum of **18**, **19** Mix (400 MHz,  $\text{CDCl}_3$ , 300 K)



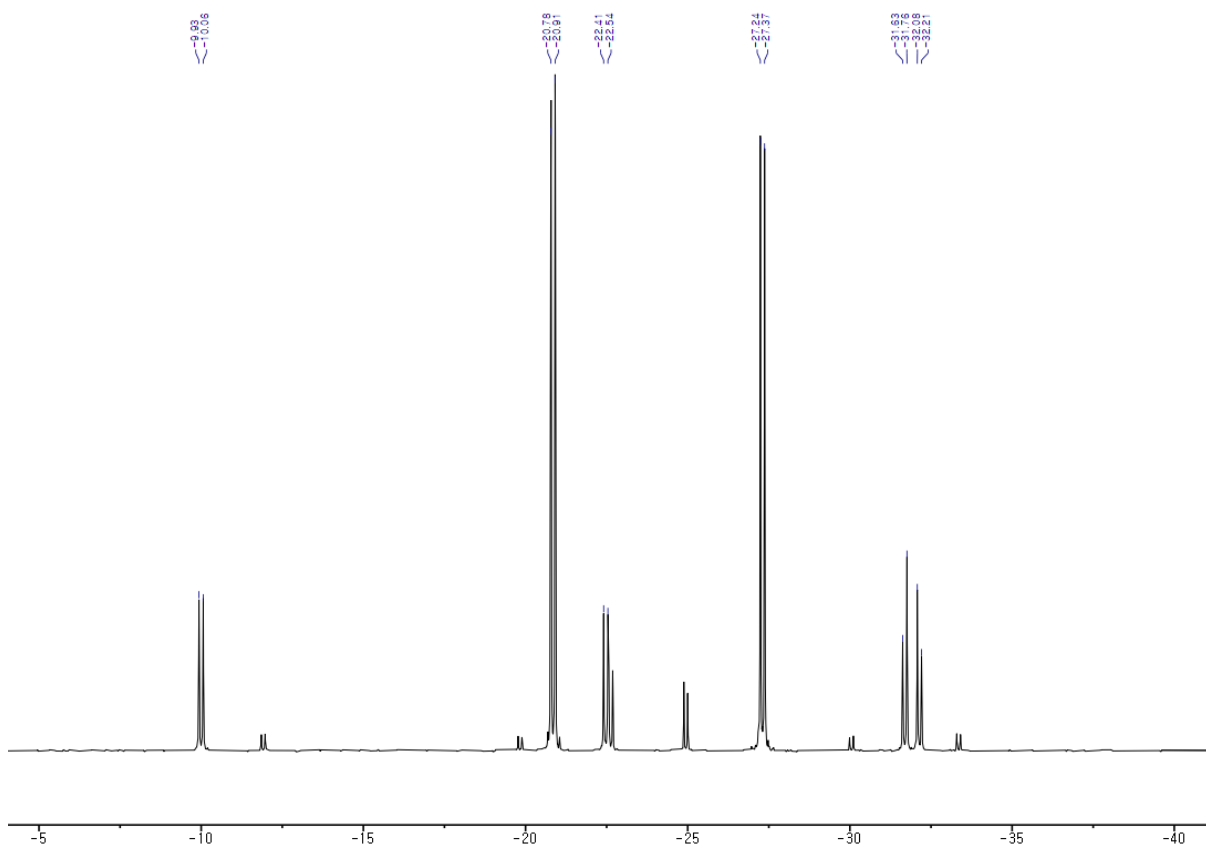

Figure S55.  $^{31}\text{P}$  NMR spectrum of **18**, **19** Mix (162 MHz,  $\text{CDCl}_3$ , 300 K)

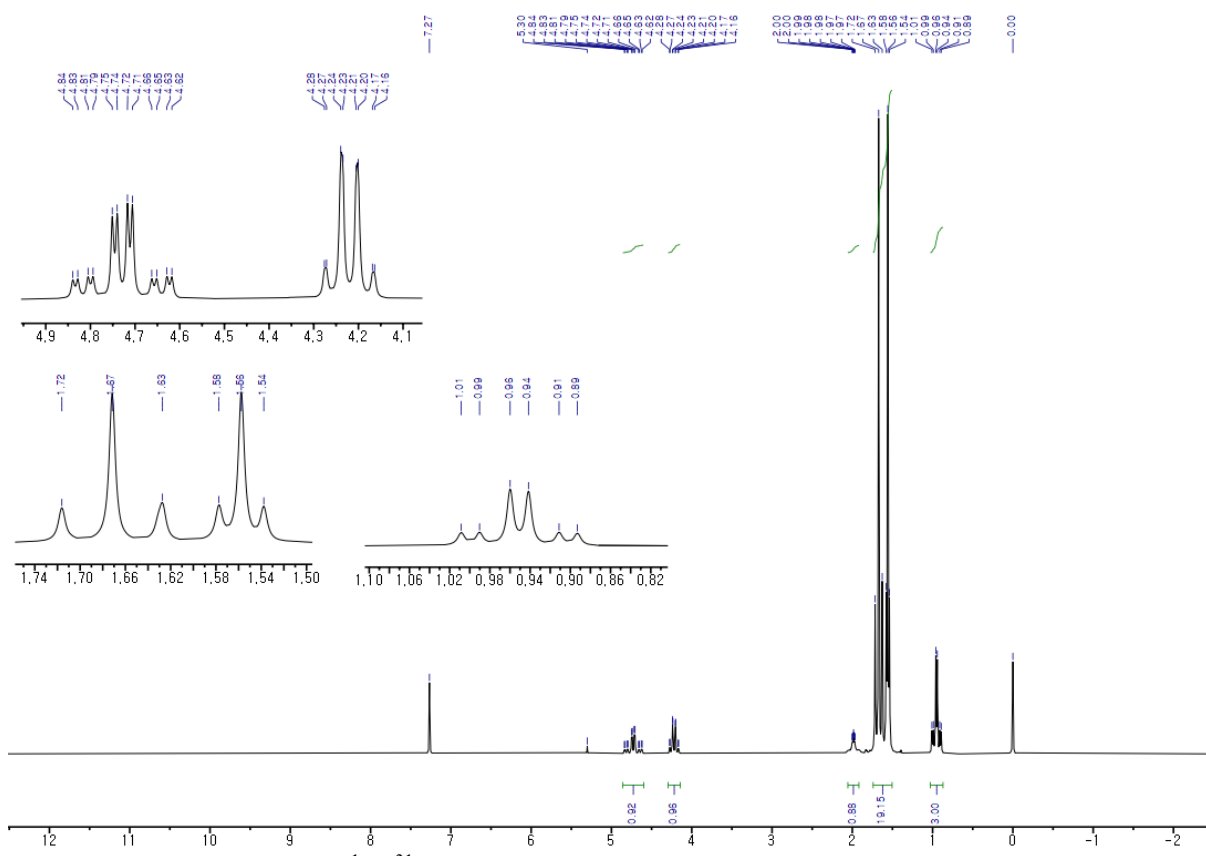

Figure S56.  $^1\text{H}\{^{31}\text{P}\}$  NMR spectrum of **18** (400 MHz,  $\text{CDCl}_3$ , 300 K)

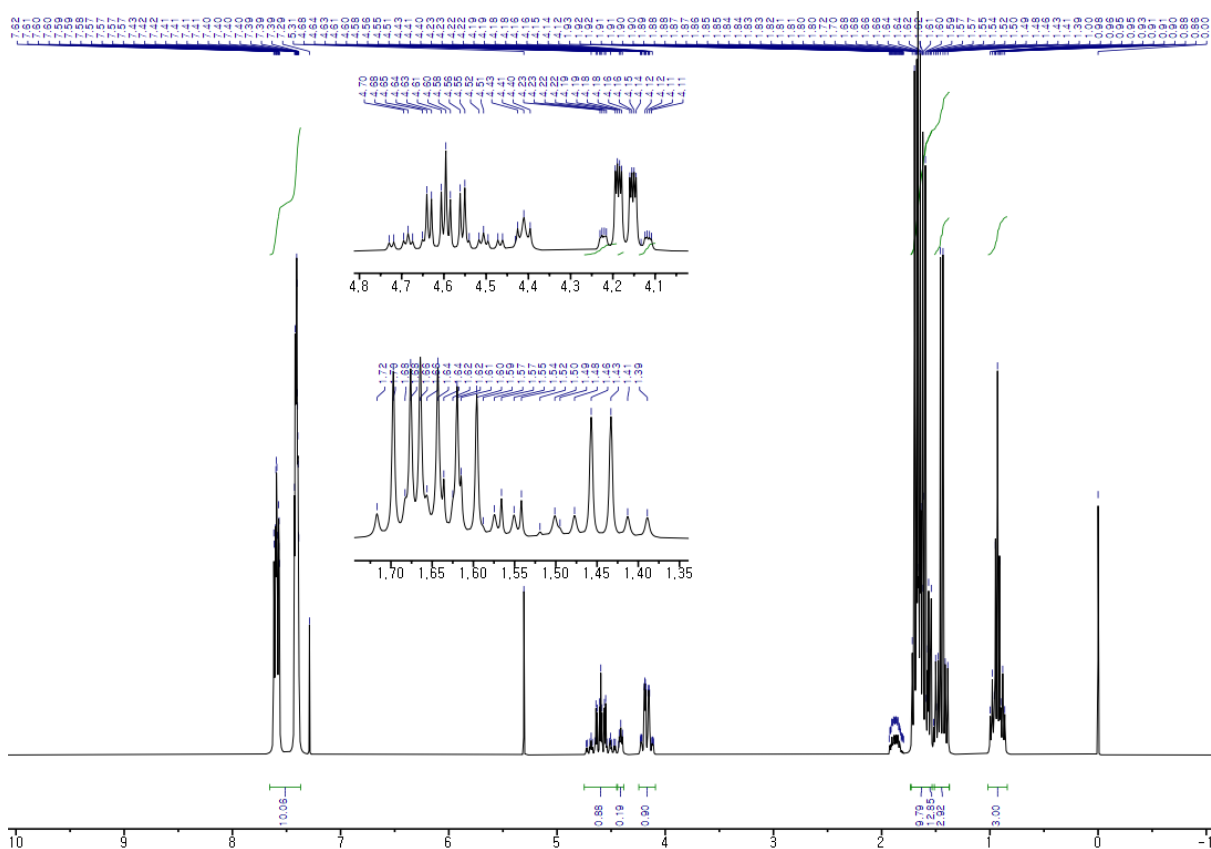

Figure S57.  $^1\text{H}$  NMR spectrum of **20**, **21** Mix (400 MHz,  $\text{CDCl}_3$ , 300 K)

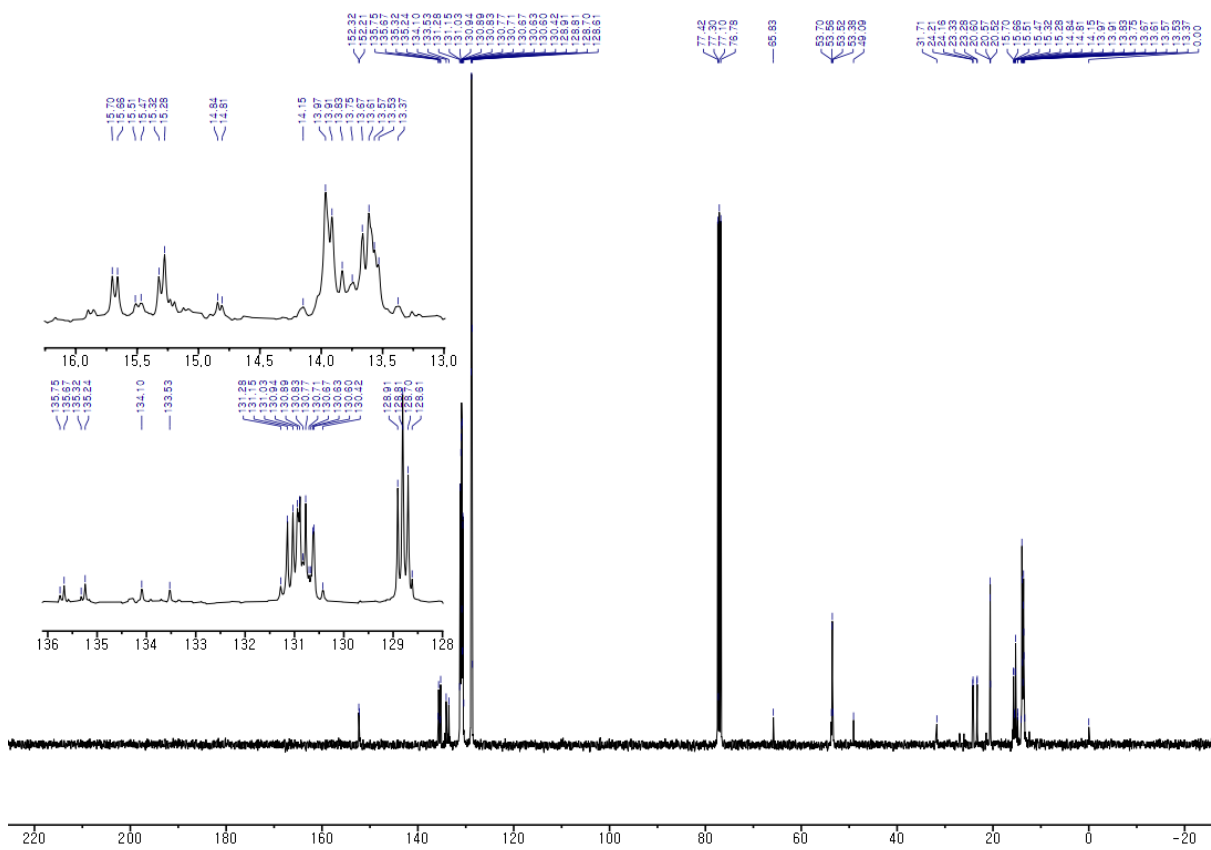

Figure S58.  $^{13}\text{C}$  NMR spectrum of **20**, **21** Mix (101 MHz,  $\text{CDCl}_3$ , 300 K)

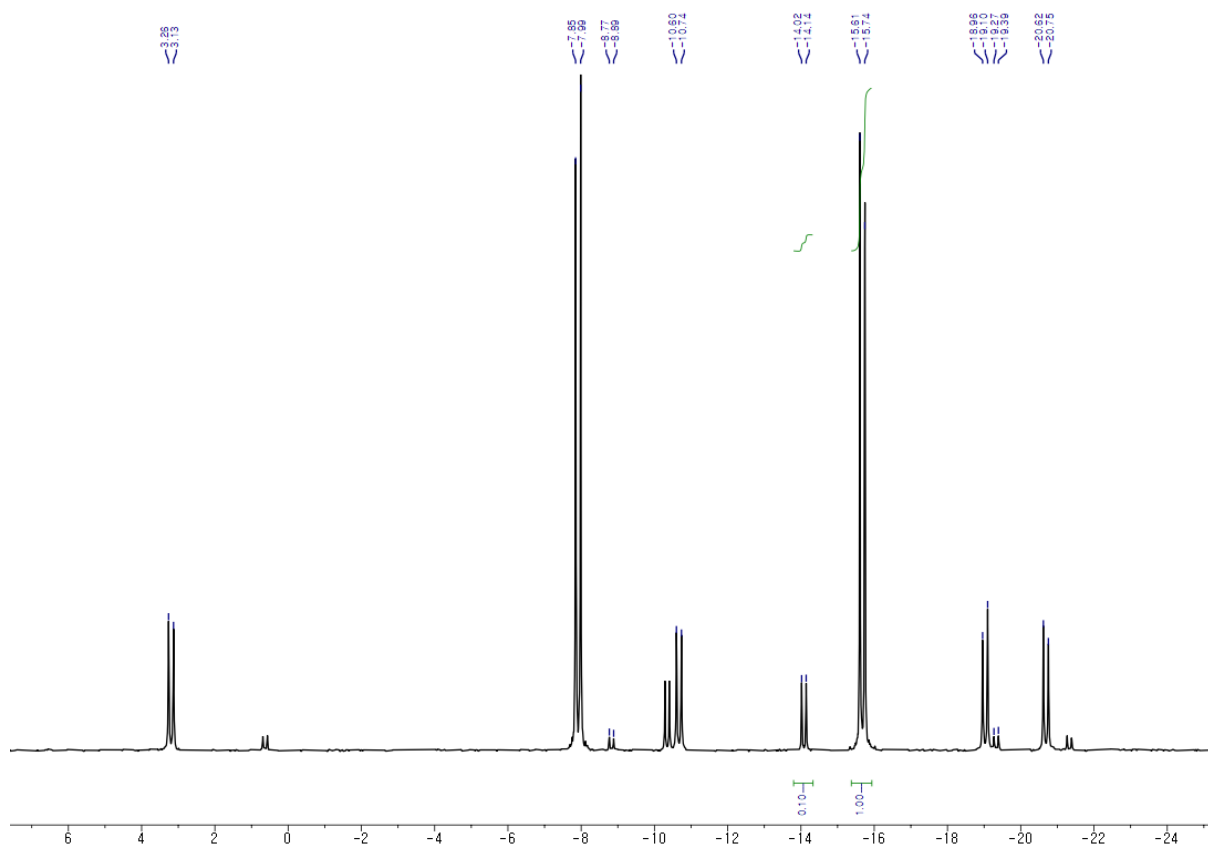

Figure S59.  $^{31}\text{P}$  NMR spectrum of **20**, **21** Mix (162 MHz,  $\text{CDCl}_3$ , 300 K)

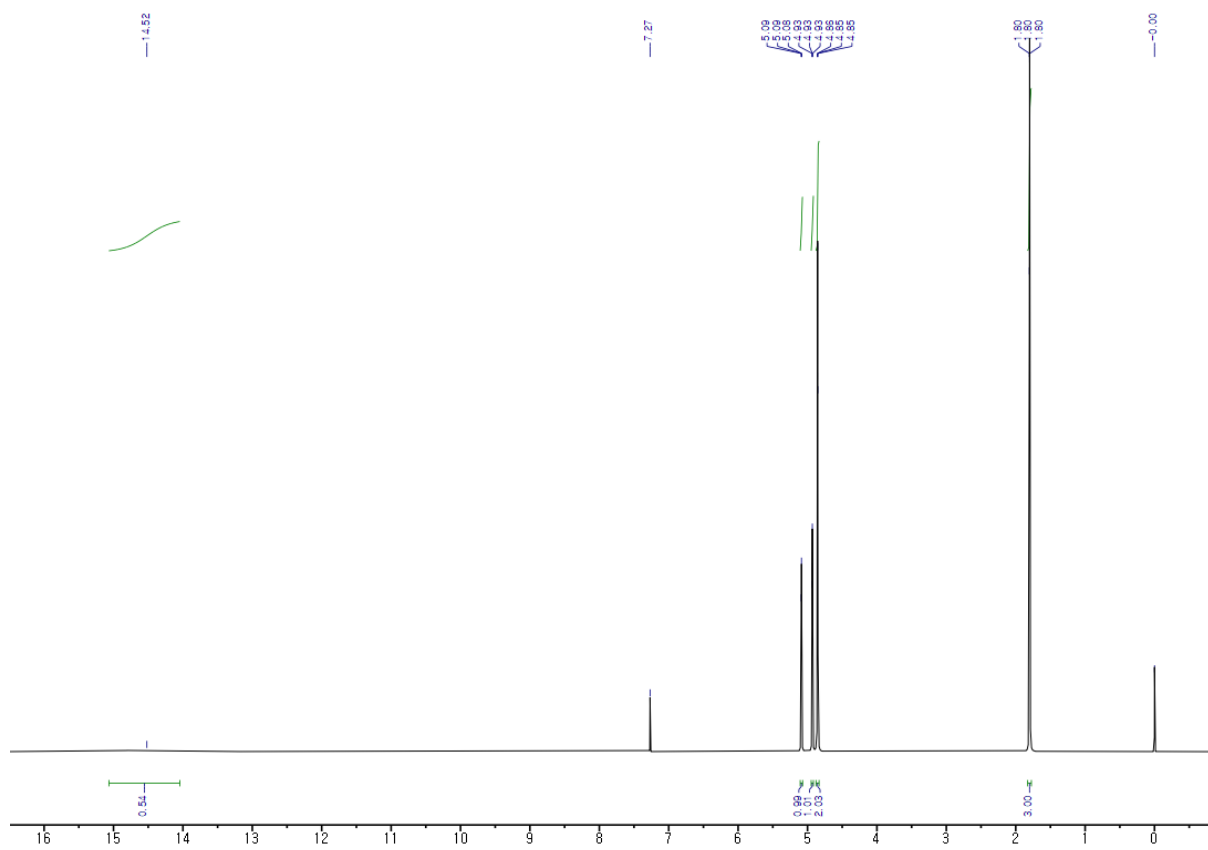

Figure S60.  $^1\text{H}$  NMR spectrum of **22** (400 MHz,  $\text{CDCl}_3$ , 300 K)

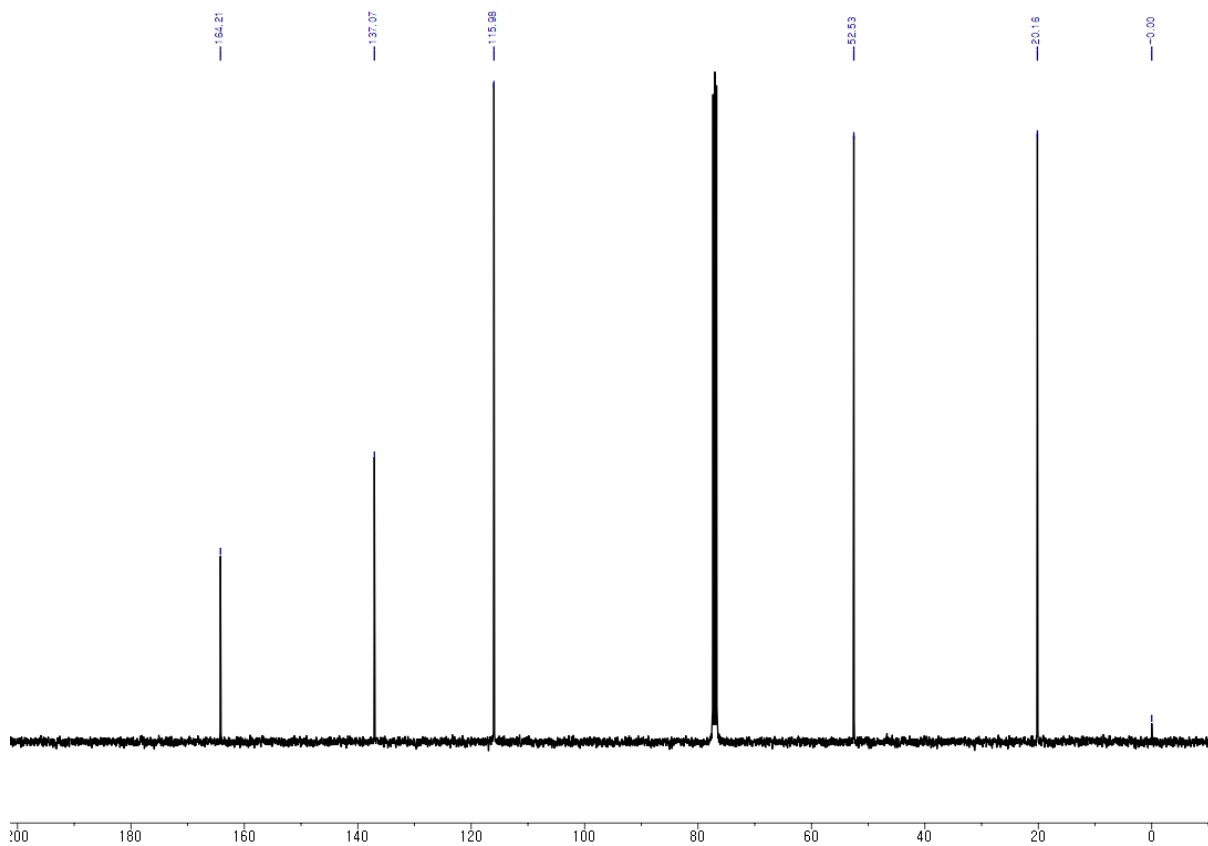

Figure S61.  $^{13}\text{C}$  NMR spectrum of **22** (101 MHz,  $\text{CDCl}_3$ , 300 K)

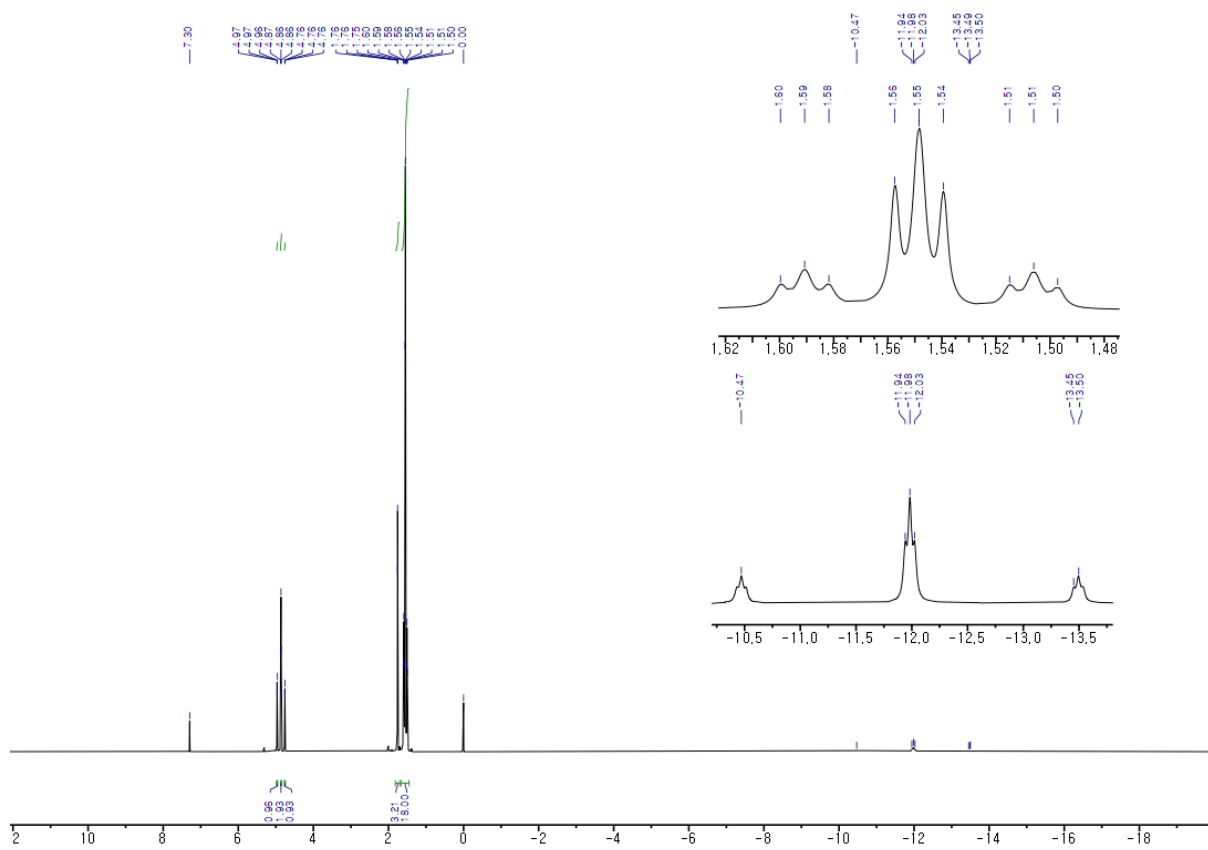

Figure S62.  $^1\text{H}$  NMR spectrum of **23** (400 MHz,  $\text{CDCl}_3$ , 300 K)

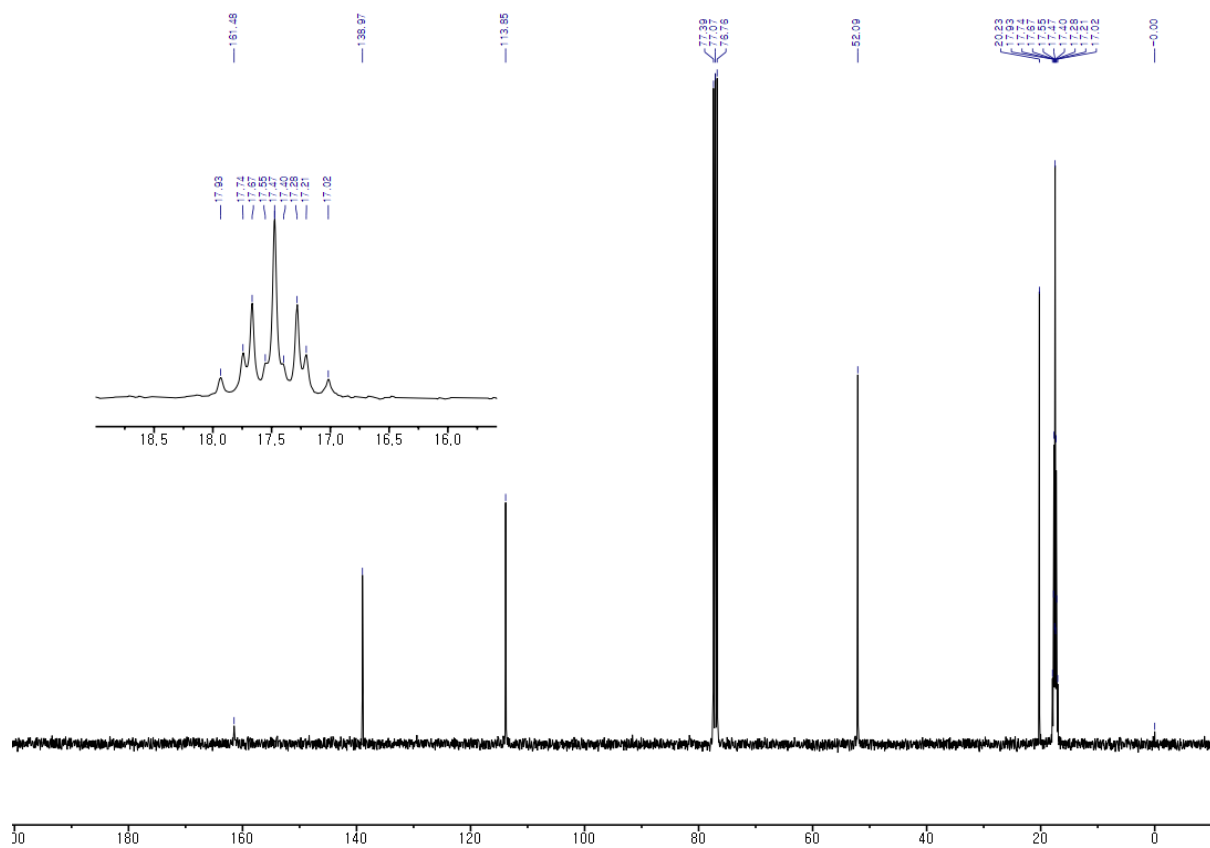

Figure S63.  $^{13}\text{C}$  NMR spectrum of **23** (101 MHz,  $\text{CDCl}_3$ , 300 K)

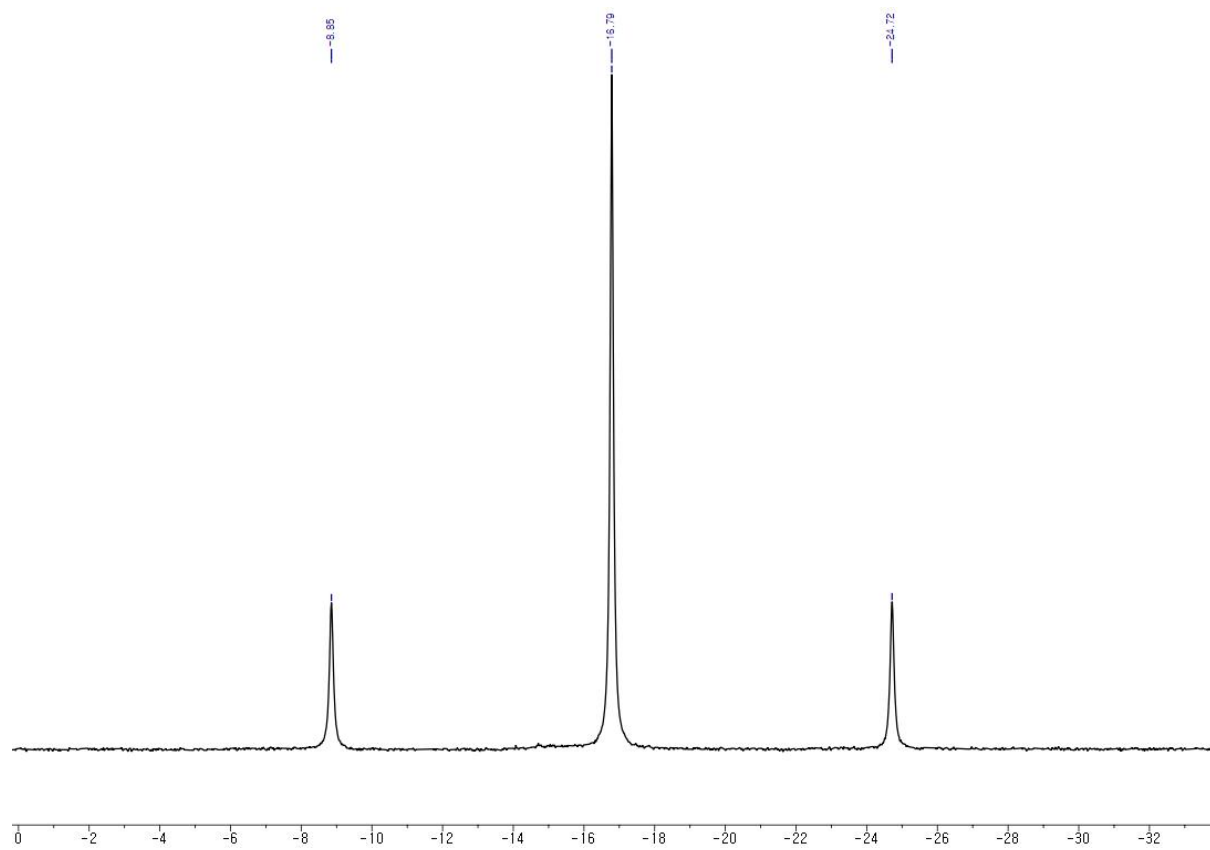

Figure S64.  $^{31}\text{P}$  NMR spectrum of **23** (162 MHz,  $\text{CDCl}_3$ , 300 K)

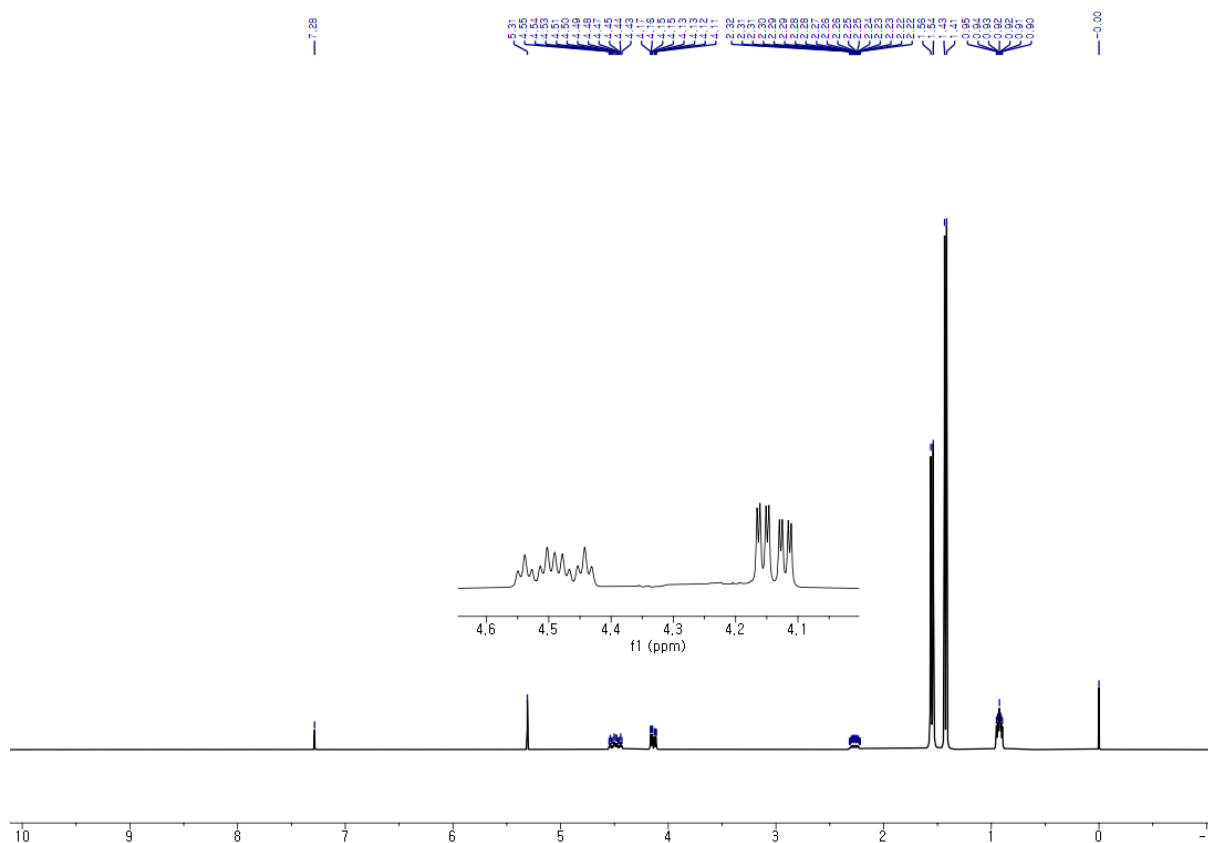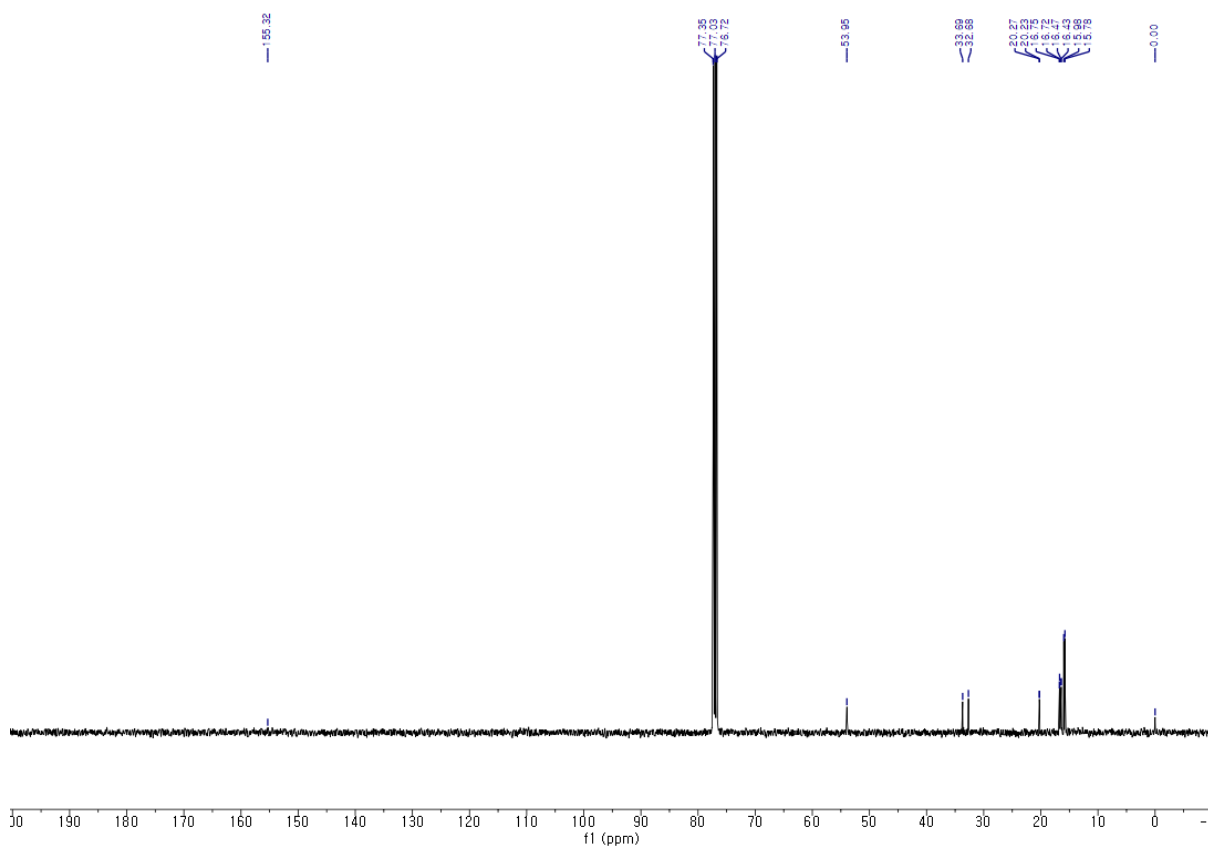

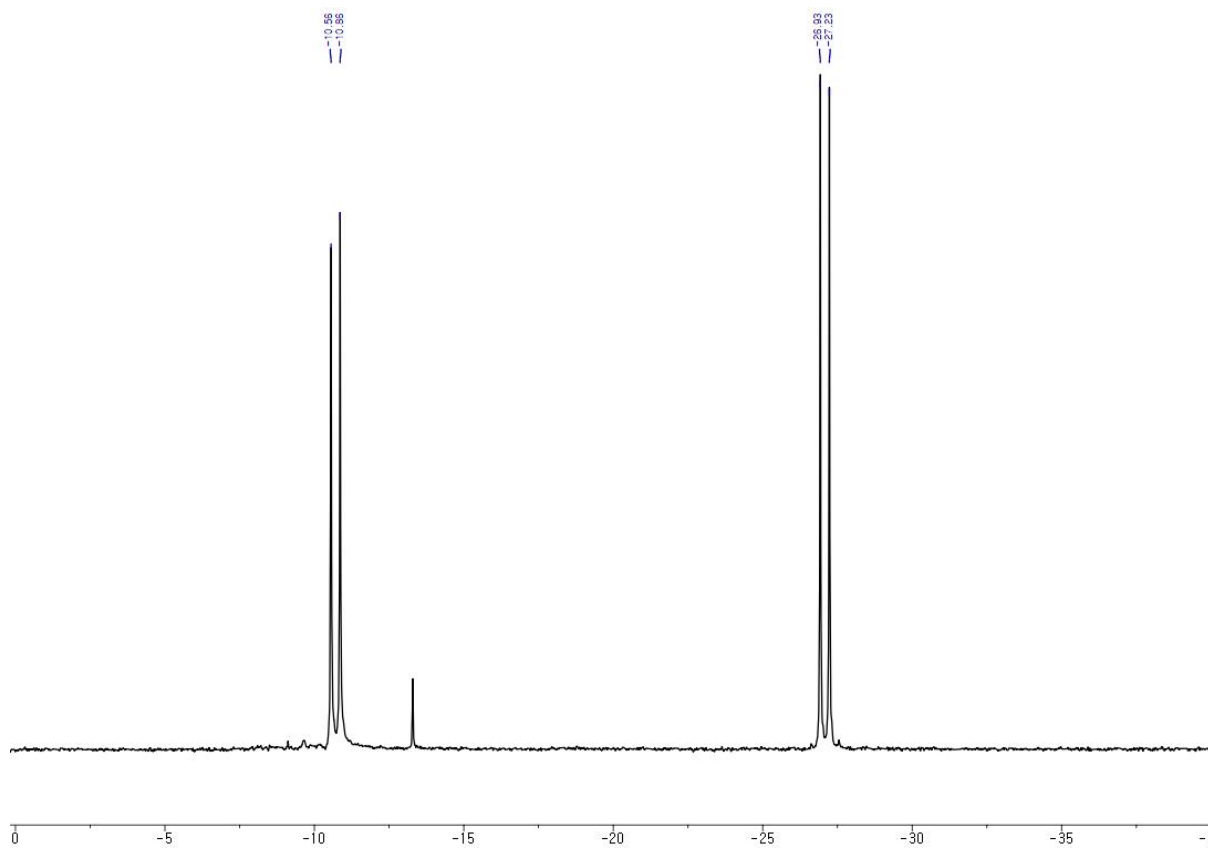

Figure S67.  $^{31}\text{P}$  NMR spectrum of **24** (162 MHz,  $\text{CDCl}_3$ , 300 K)

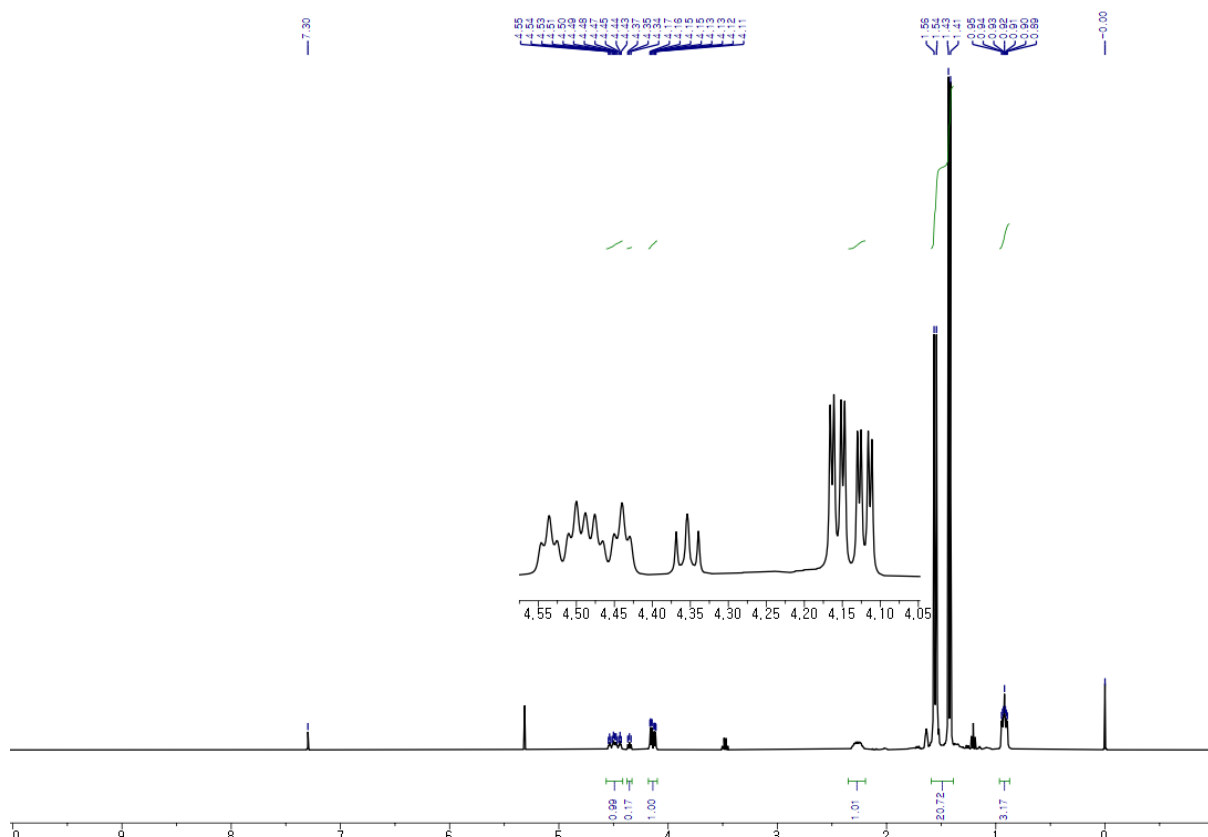

Figure S68.  $^1\text{H}$  NMR spectrum of **24**, **25** Mix (400 MHz,  $\text{CDCl}_3$ , 300 K)

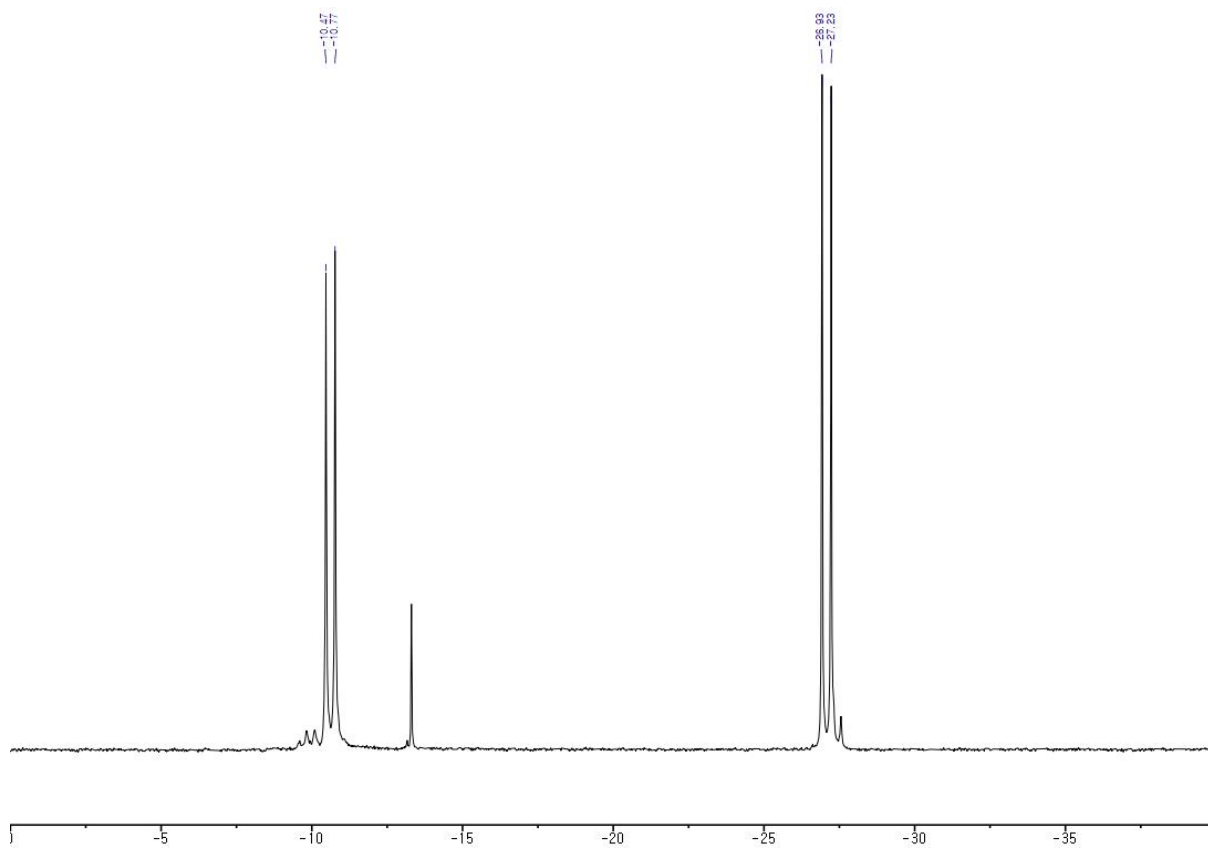

Figure S69.  $^{31}\text{P}$  NMR spectrum of **24**, **25** Mix (162 MHz,  $\text{CDCl}_3$ , 300 K)

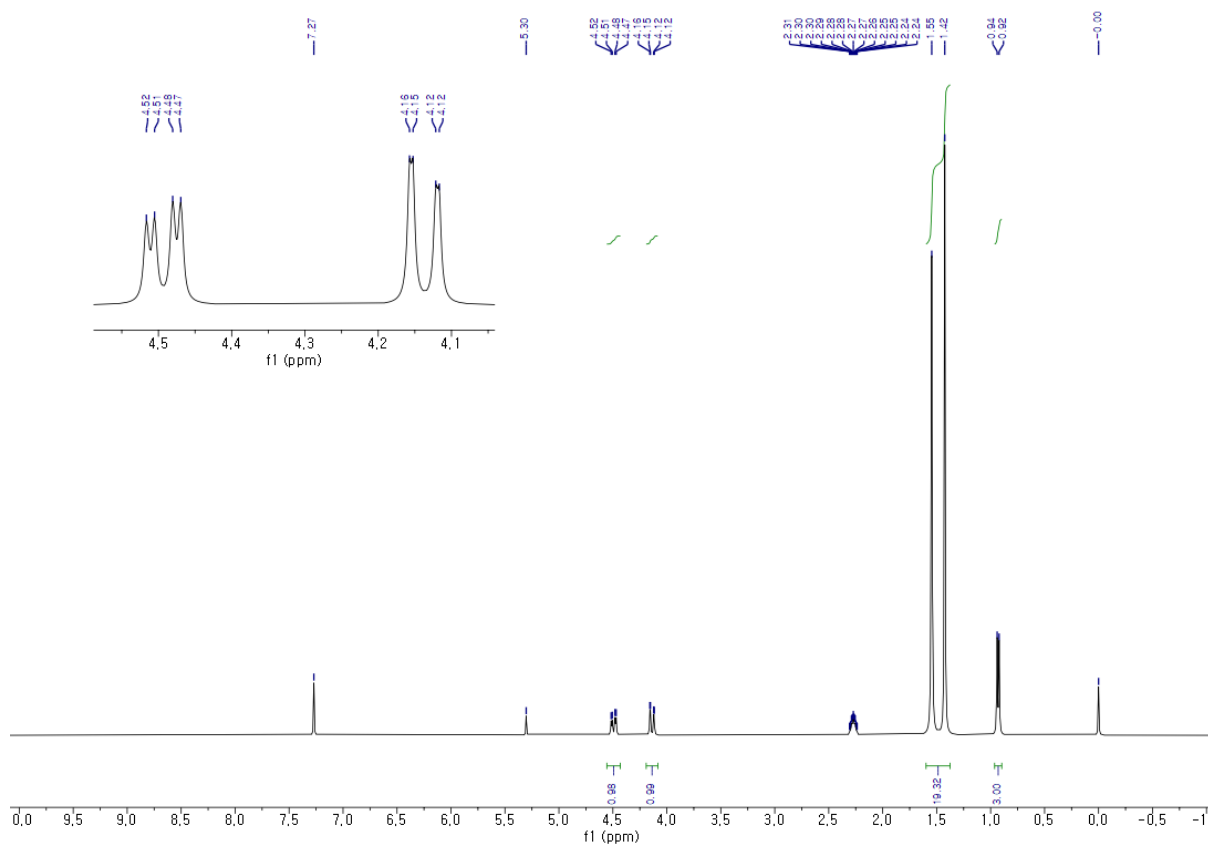

Figure S70.  $^1\text{H}\{^{31}\text{P}\}$  NMR spectrum of **24** (400 MHz,  $\text{CDCl}_3$ , 300 K)



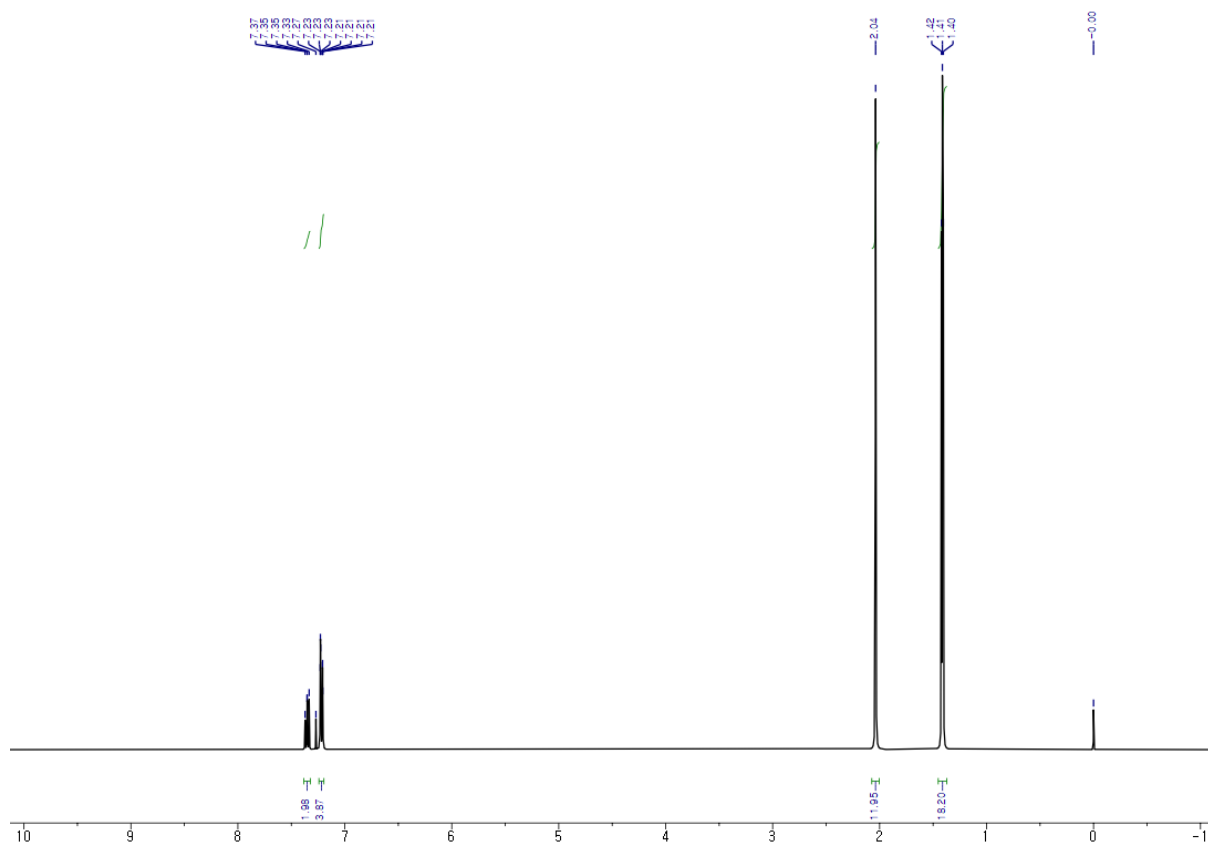

Figure S71.  $^1\text{H}$  NMR spectrum of **26** (400 MHz,  $\text{CDCl}_3$ , 300 K)

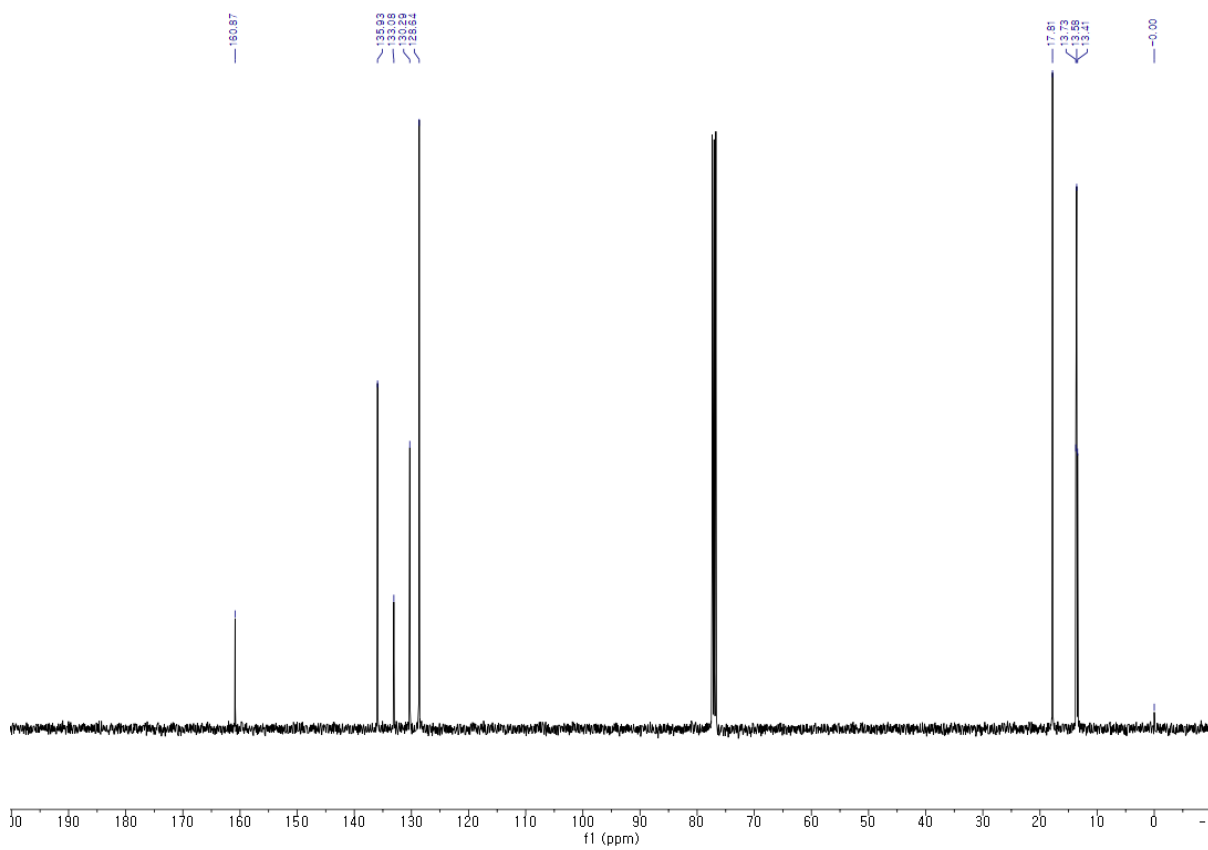

Figure S72.  $^{13}\text{C}$  NMR spectrum of **26** (101 MHz,  $\text{CDCl}_3$ , 300 K)

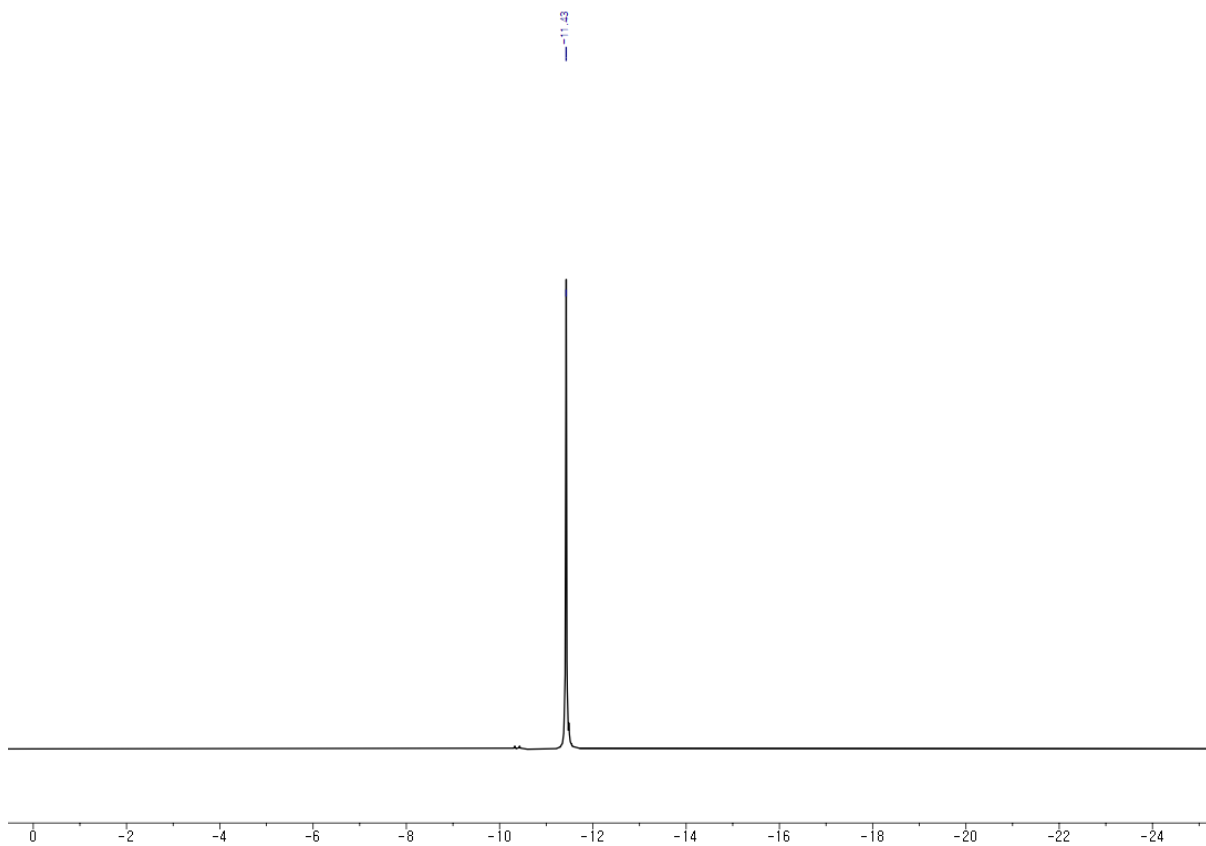

**Figure S73.**  $^{31}\text{P}$  NMR spectrum of **26** (162 MHz,  $\text{CDCl}_3$ , 300 K)

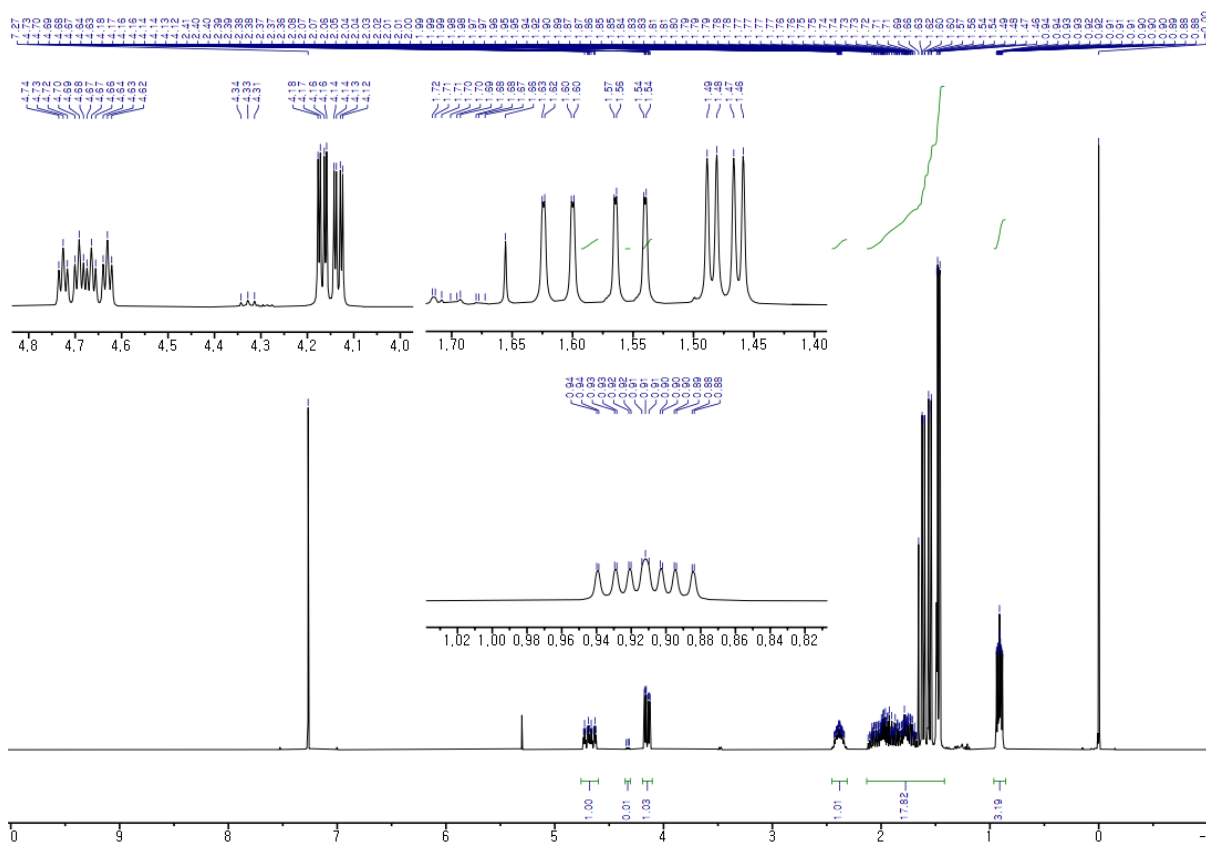

**Figure S74.**  $^1\text{H}$  NMR spectrum of **27** (400 MHz,  $\text{CDCl}_3$ , 300 K)

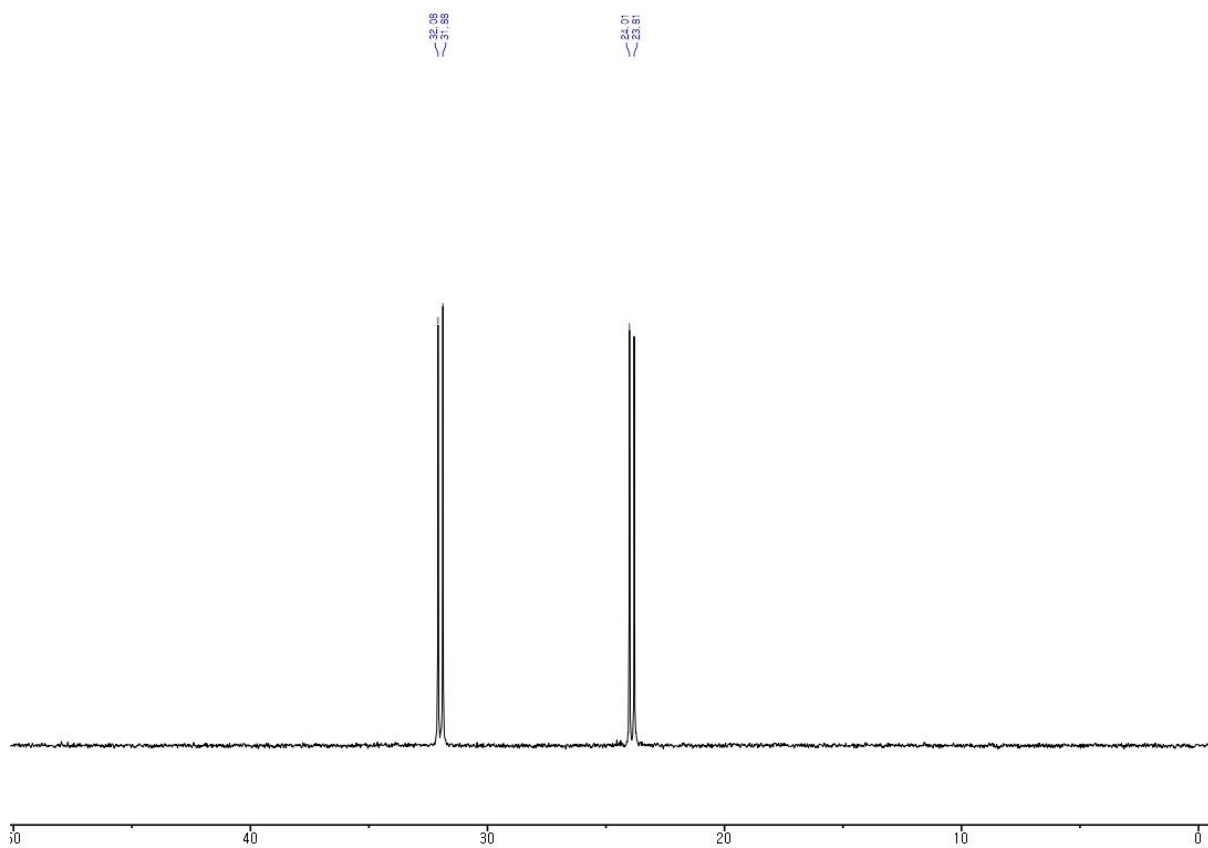

**Figure S75.**  $^{31}\text{P}$  NMR spectrum of **27** (162 MHz,  $\text{CDCl}_3$ , 300 K)

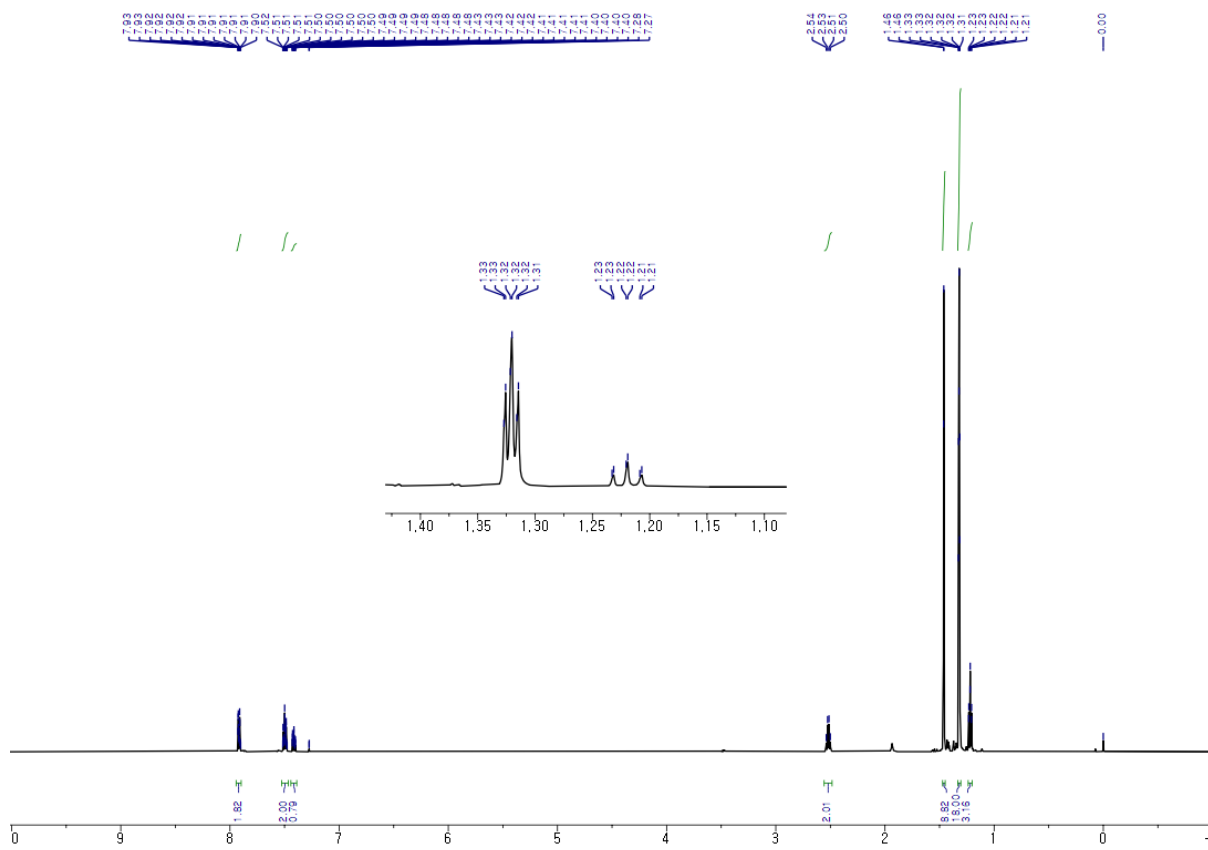

**Figure S76.**  $^1\text{H}$  NMR spectrum of **28** (600 MHz,  $\text{CDCl}_3$ , 300 K)

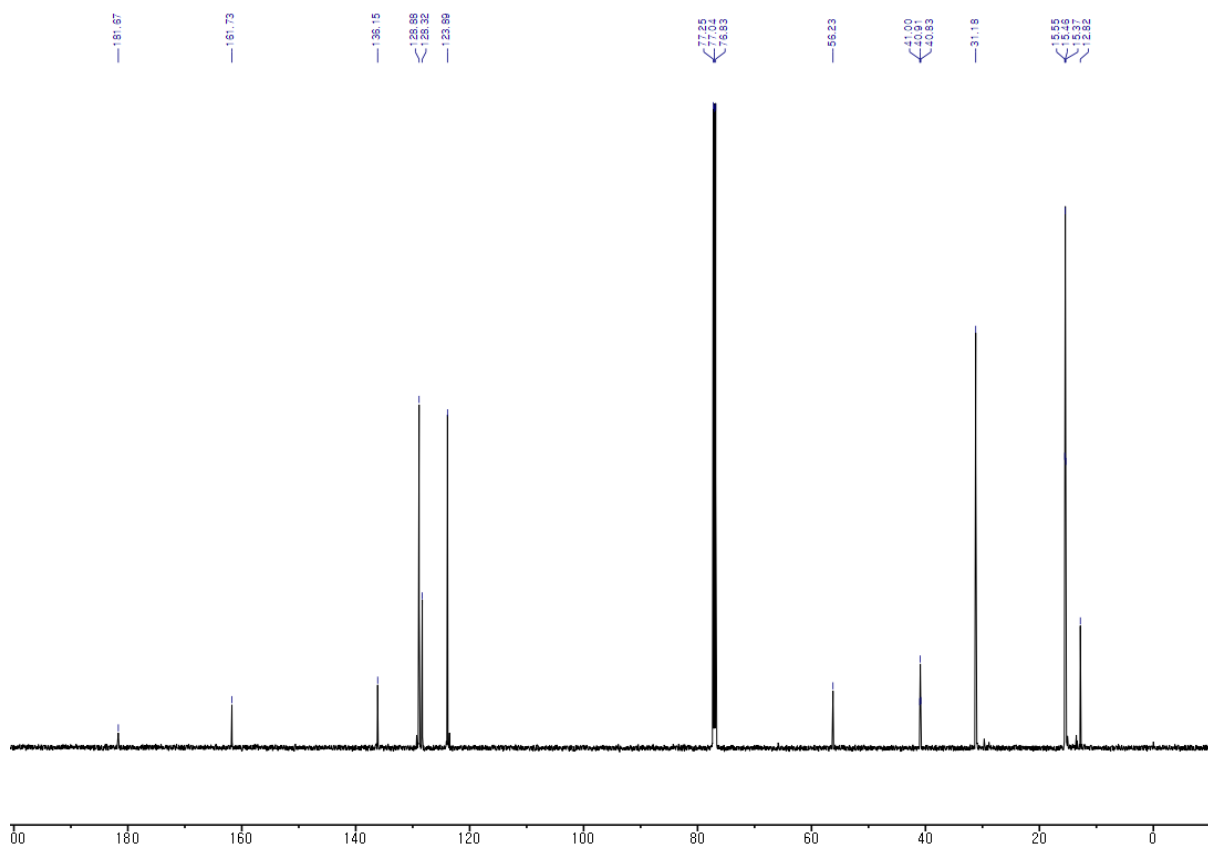

Figure S77.  $^{13}\text{C}$  NMR spectrum of **28** (151 MHz,  $\text{CDCl}_3$ , 300 K)

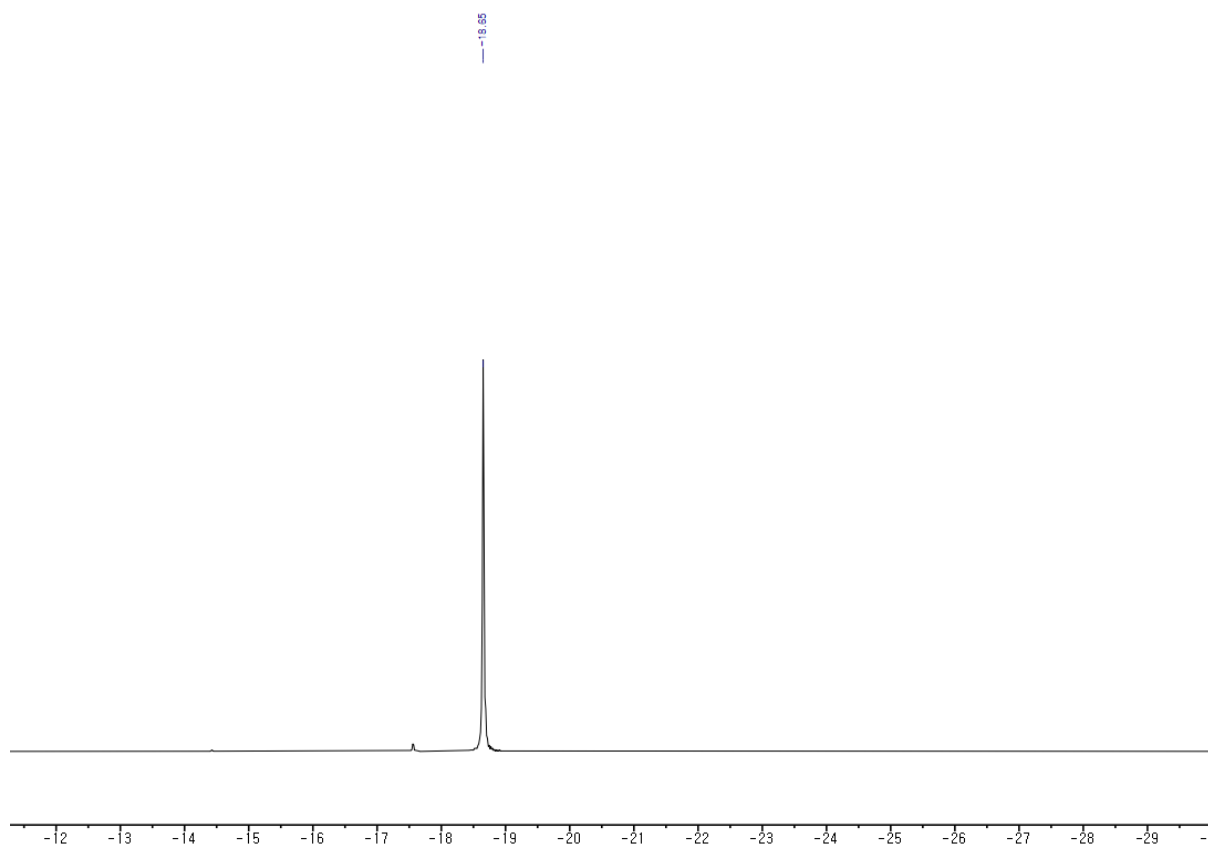

Figure S78.  $^{31}\text{P}$  NMR spectrum of **28** (243 MHz,  $\text{CDCl}_3$ , 300 K)

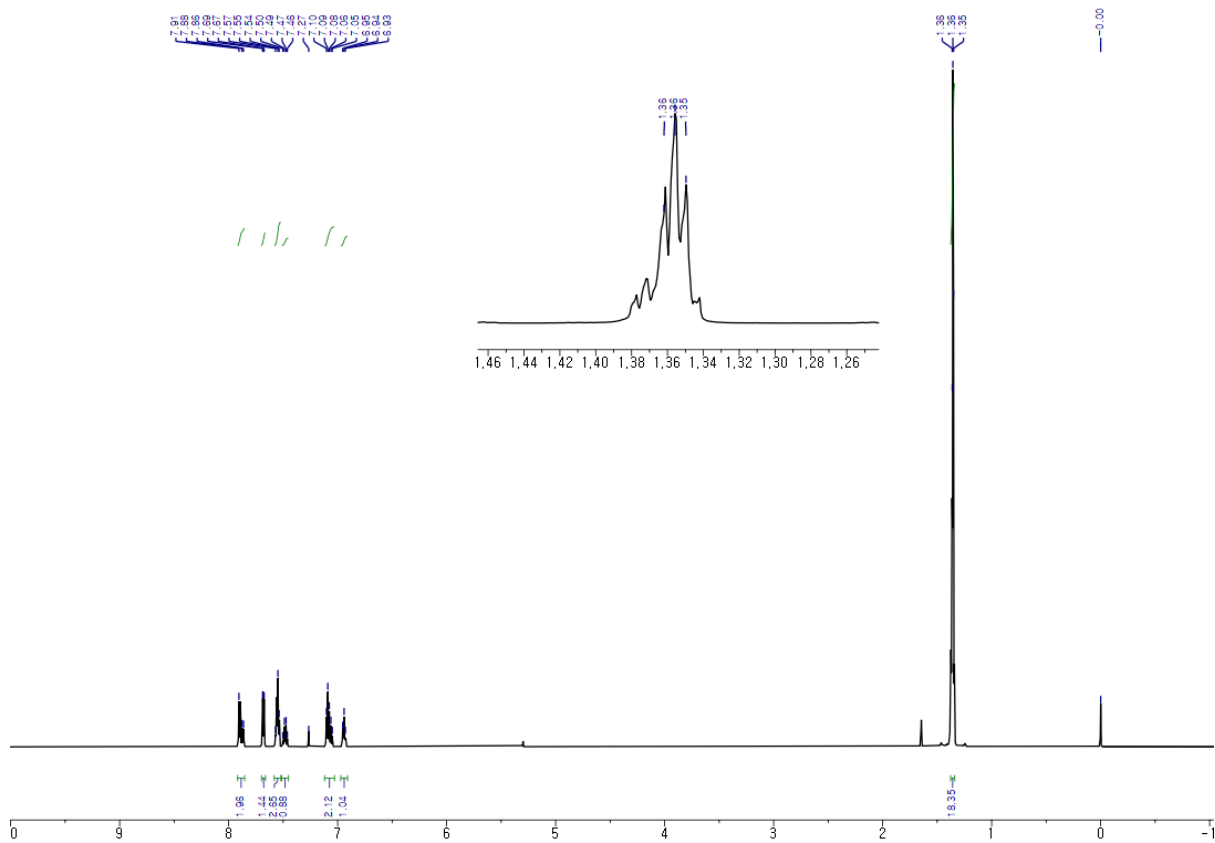

Figure S79. <sup>1</sup>H NMR spectrum of **29** (600 MHz, CDCl<sub>3</sub>, 300 K)

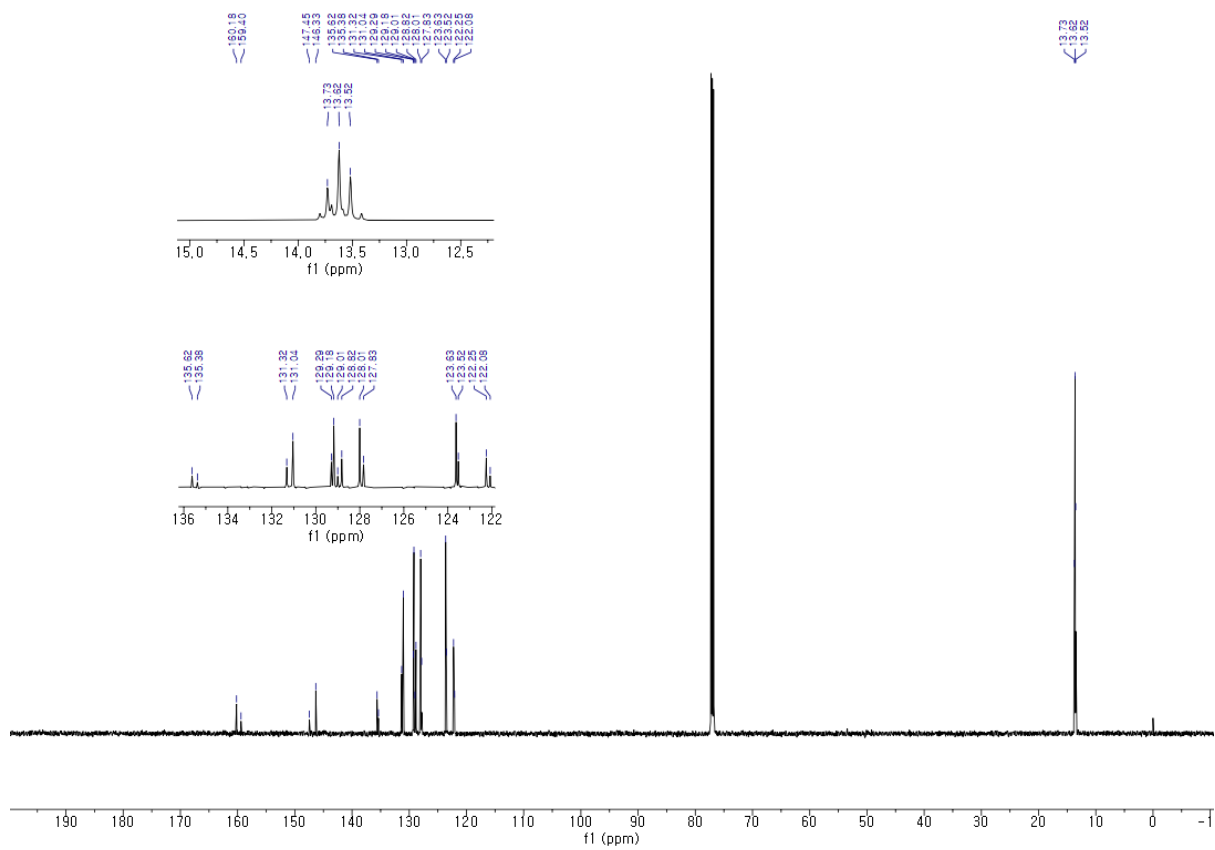

Figure S80. <sup>13</sup>C NMR spectrum of **29** (151 MHz, CDCl<sub>3</sub>, 300 K)

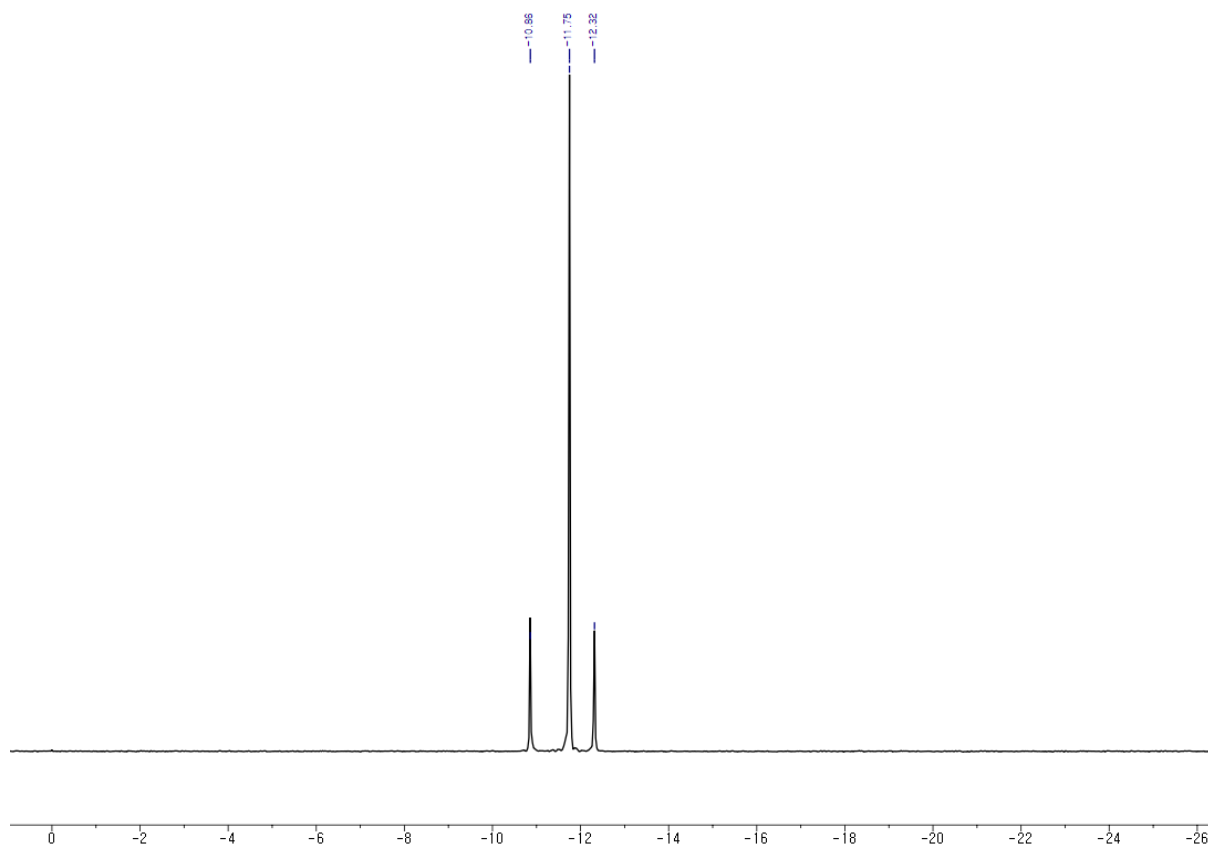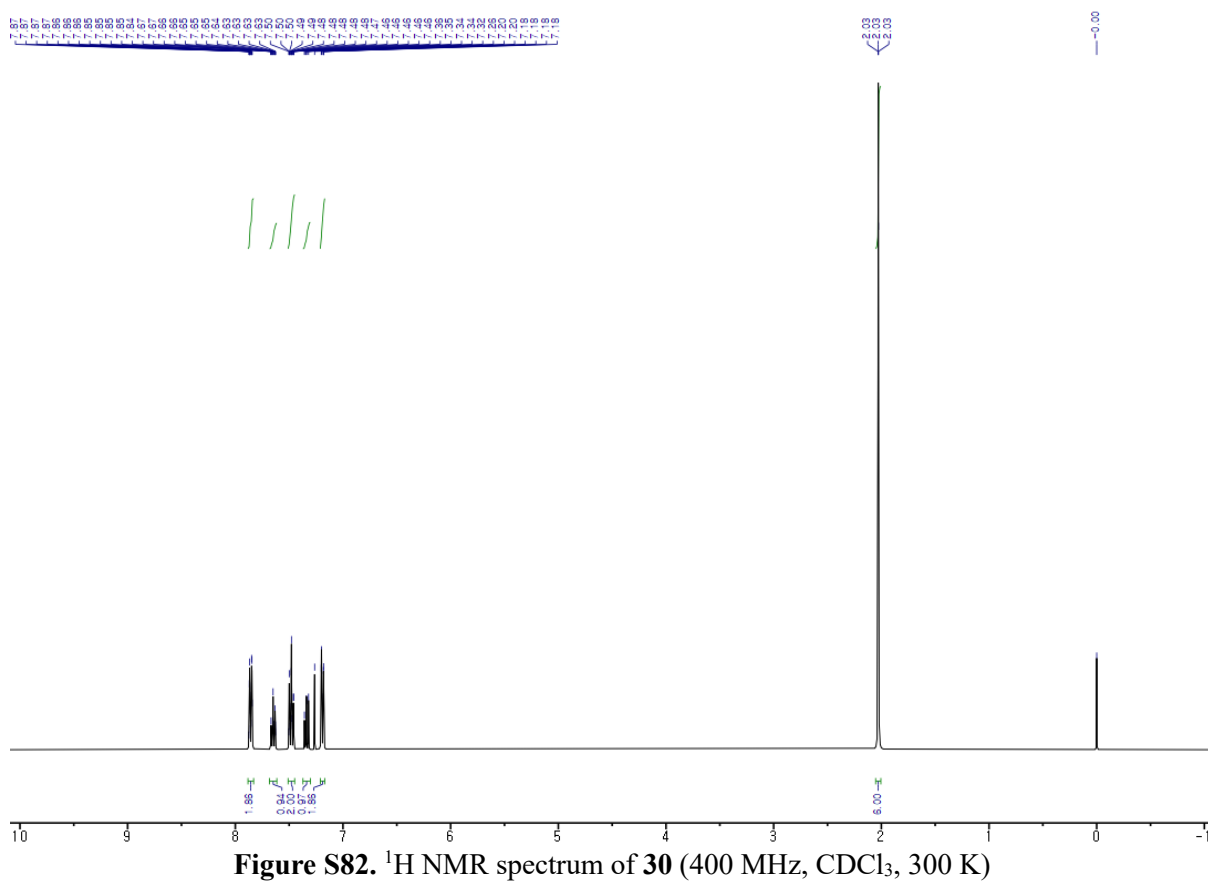

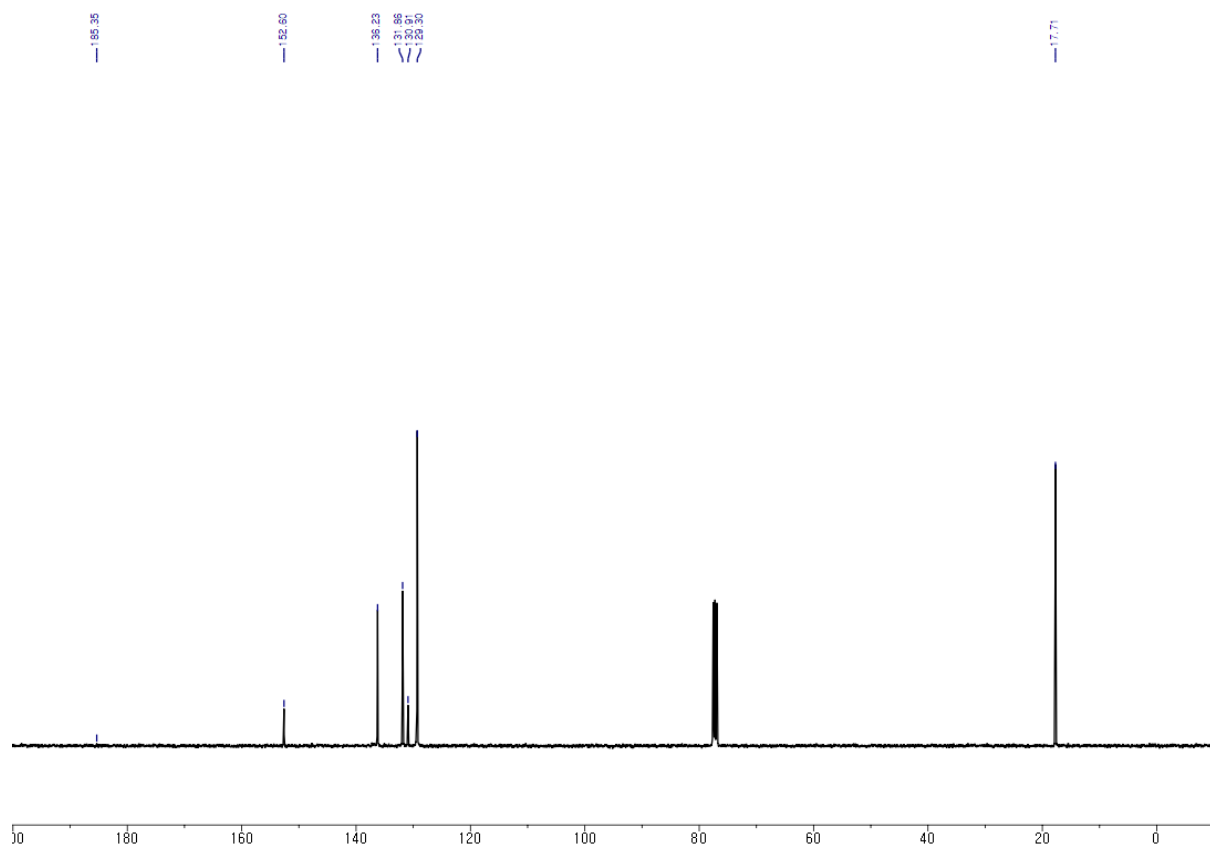

**Figure S83.**  $^{13}\text{C}$  NMR spectrum of **30** (101 MHz,  $\text{CDCl}_3$ , 300 K)

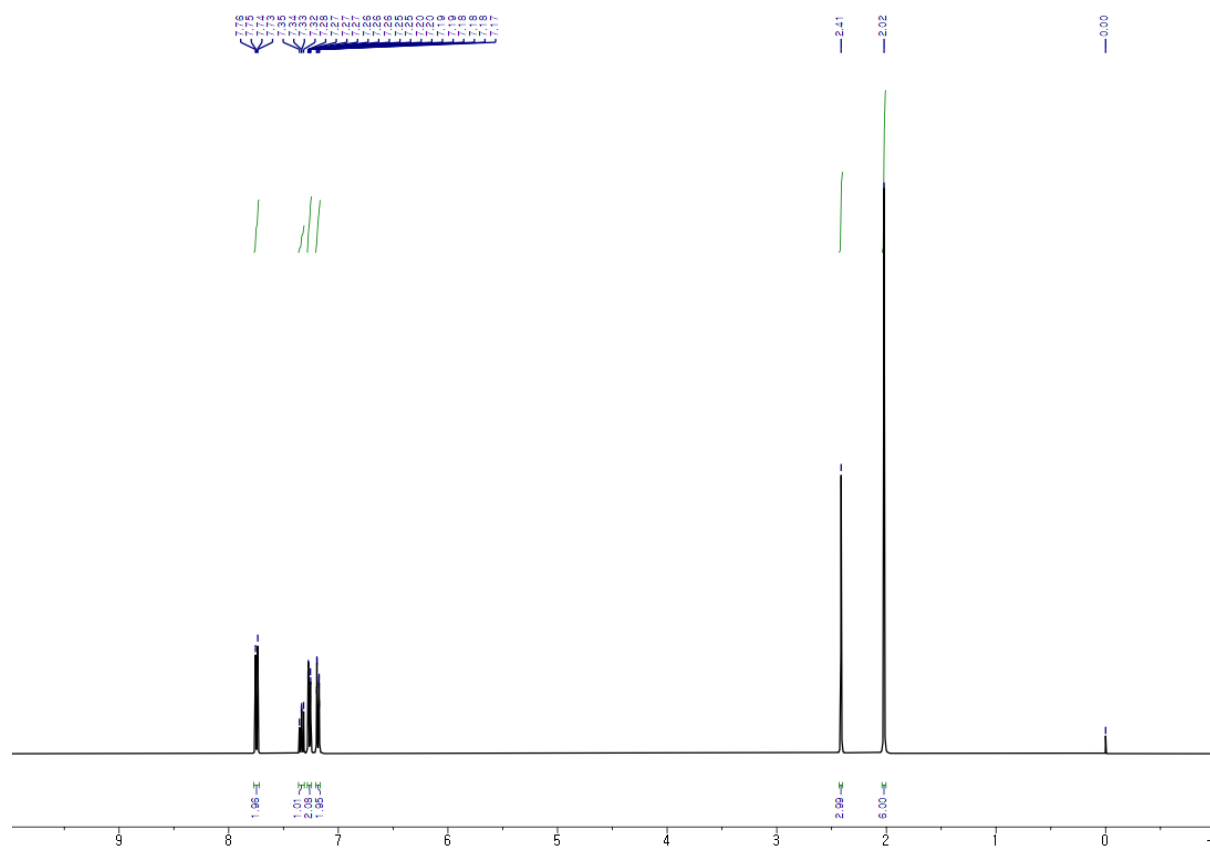

**Figure S84.**  $^1\text{H}$  NMR spectrum of **31** (400 MHz,  $\text{CDCl}_3$ , 300 K)





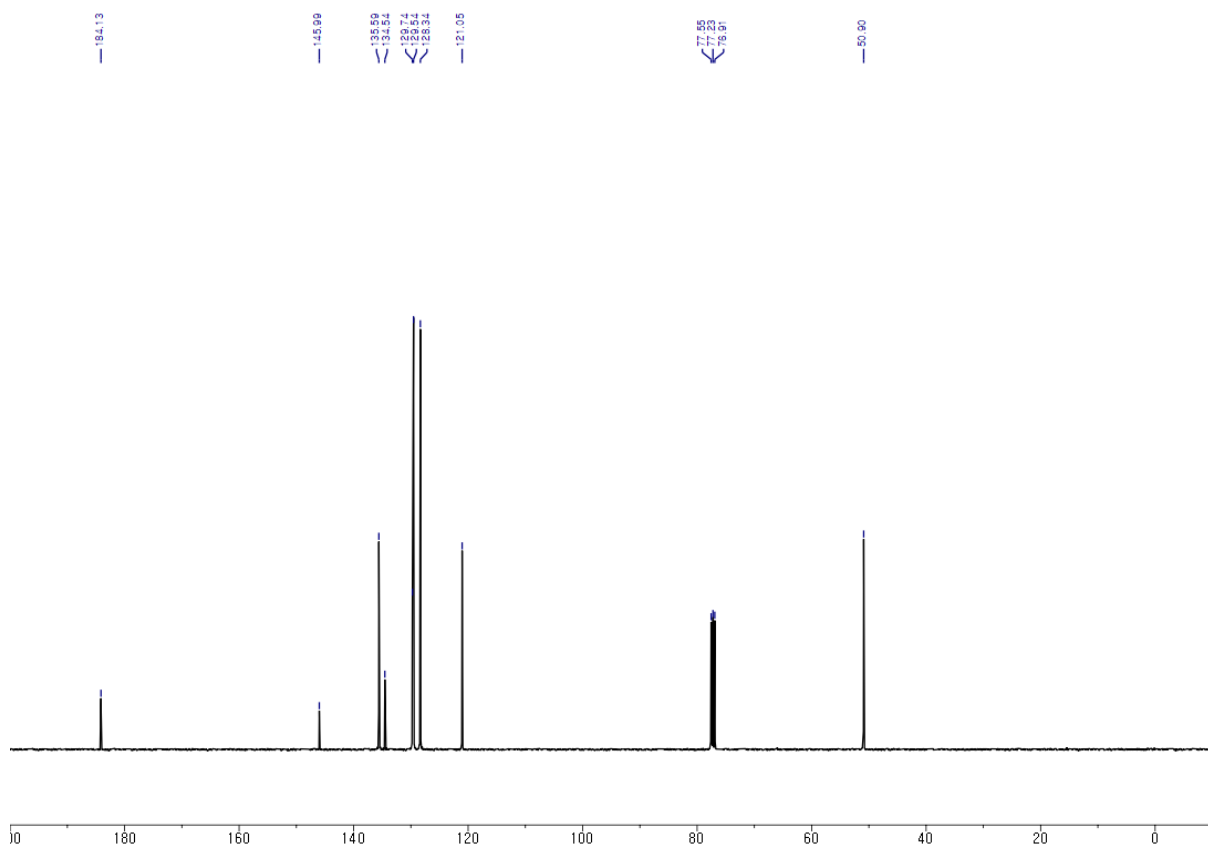

Figure S87.  $^{13}\text{C}$  NMR spectrum of **32** (101 MHz,  $\text{CDCl}_3$ , 300 K)

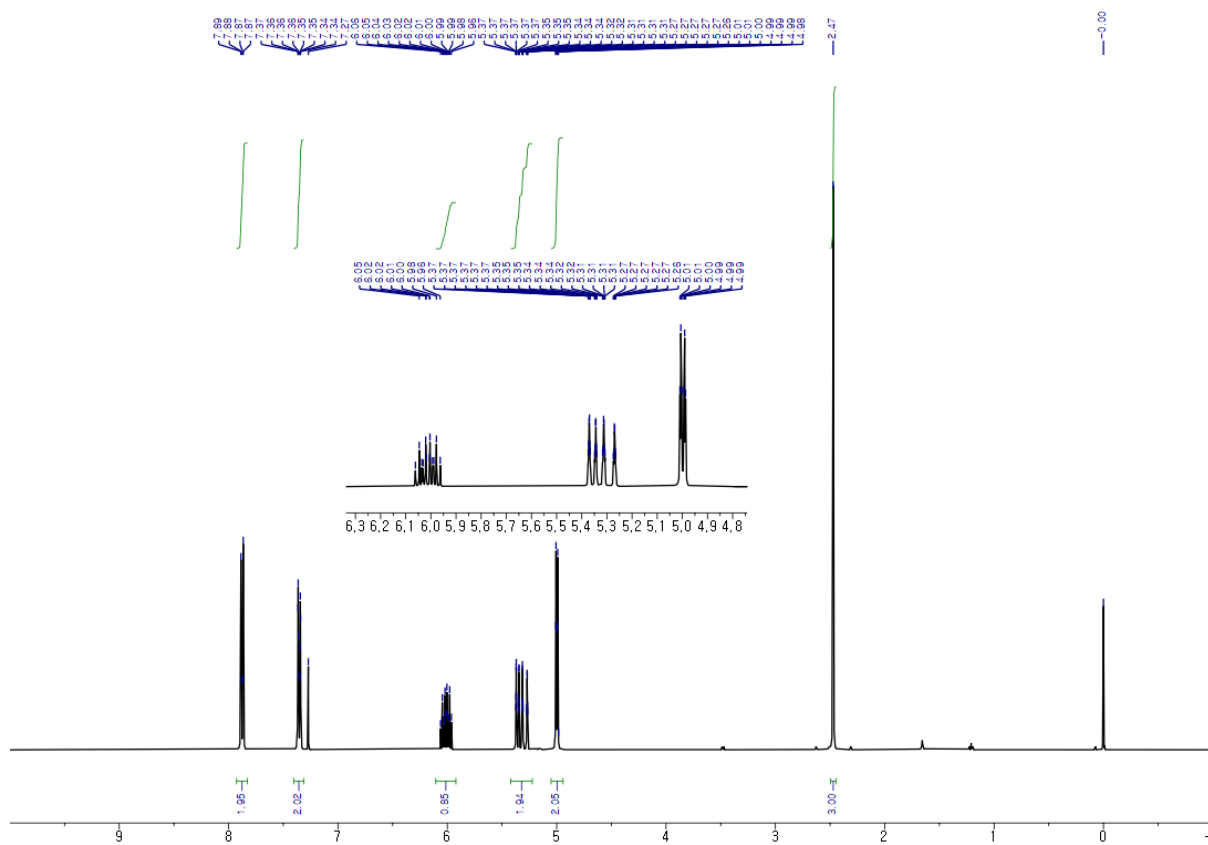

Figure S88.  $^1\text{H}$  NMR spectrum of **33** (400 MHz,  $\text{CDCl}_3$ , 300 K)

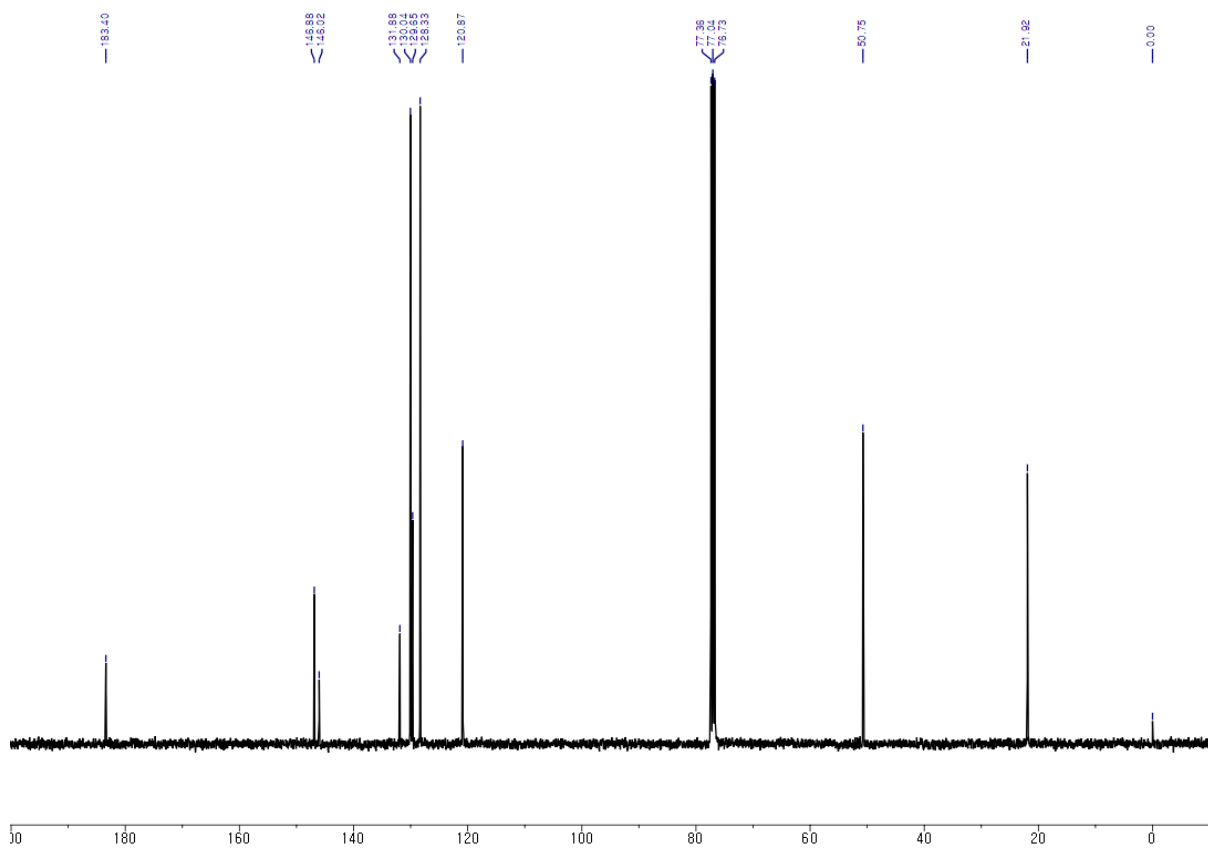

Figure S89.  $^{13}\text{C}$  NMR spectrum of **33** (101 MHz,  $\text{CDCl}_3$ , 300 K)

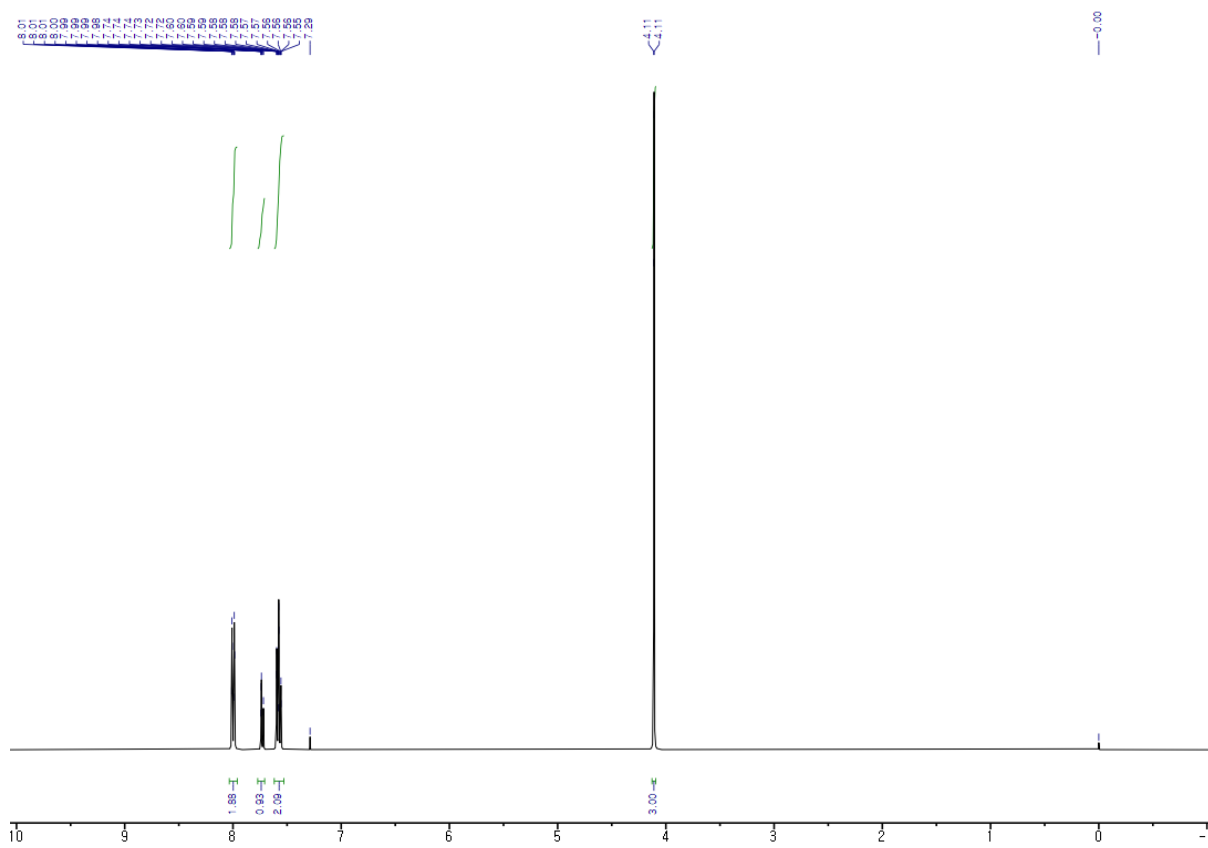

Figure S90.  $^1\text{H}$  NMR spectrum of **34** (400 MHz,  $\text{CDCl}_3$ , 300 K)

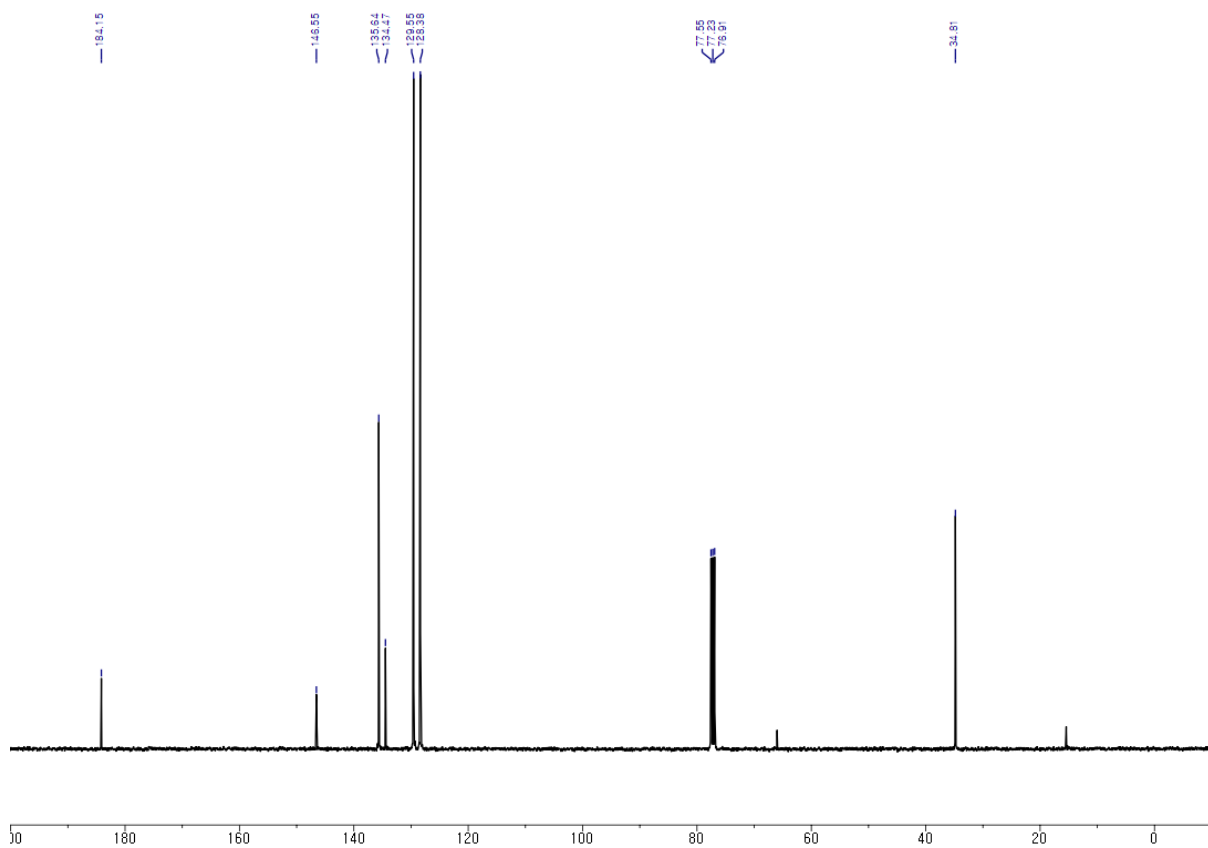

Figure S91.  $^{13}\text{C}$  NMR spectrum of **34** (101 MHz,  $\text{CDCl}_3$ , 300 K)

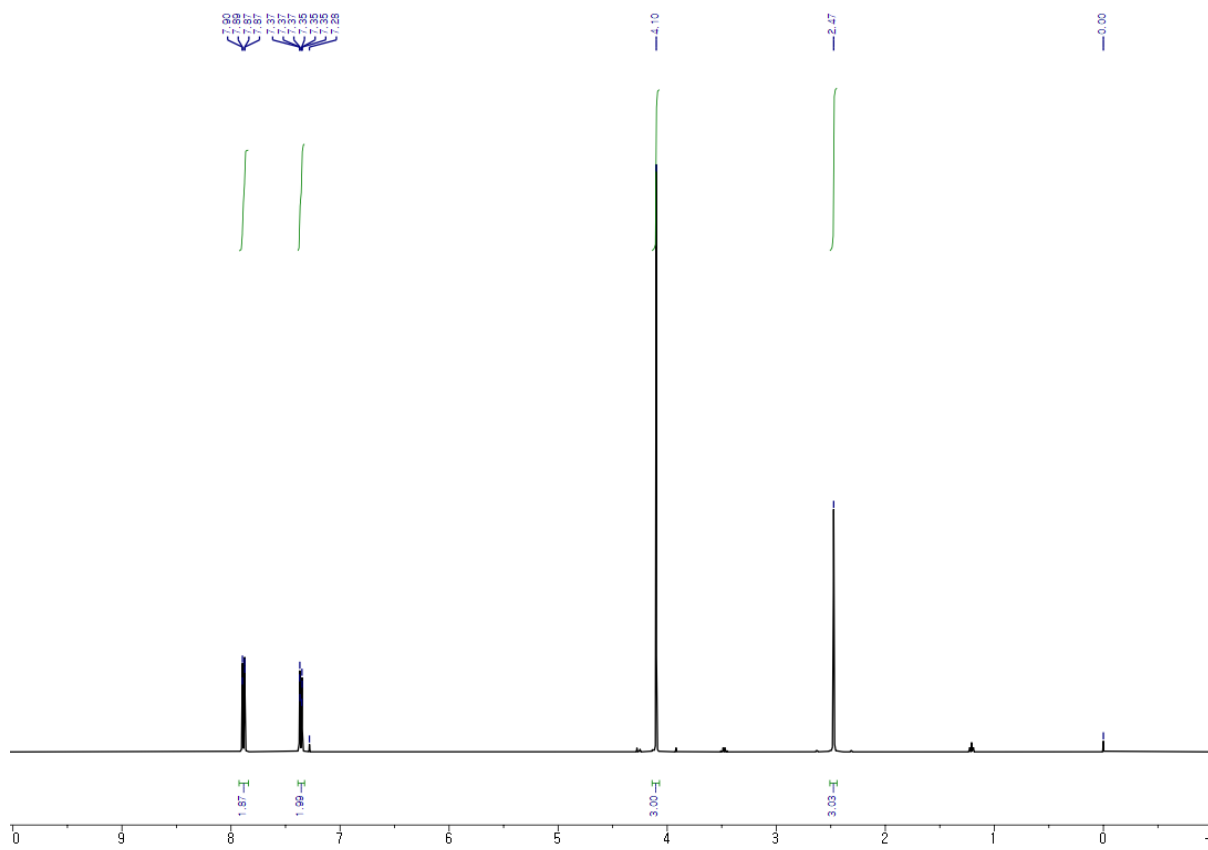

Figure S92.  $^1\text{H}$  NMR spectrum of **35** (400 MHz,  $\text{CDCl}_3$ , 300 K)

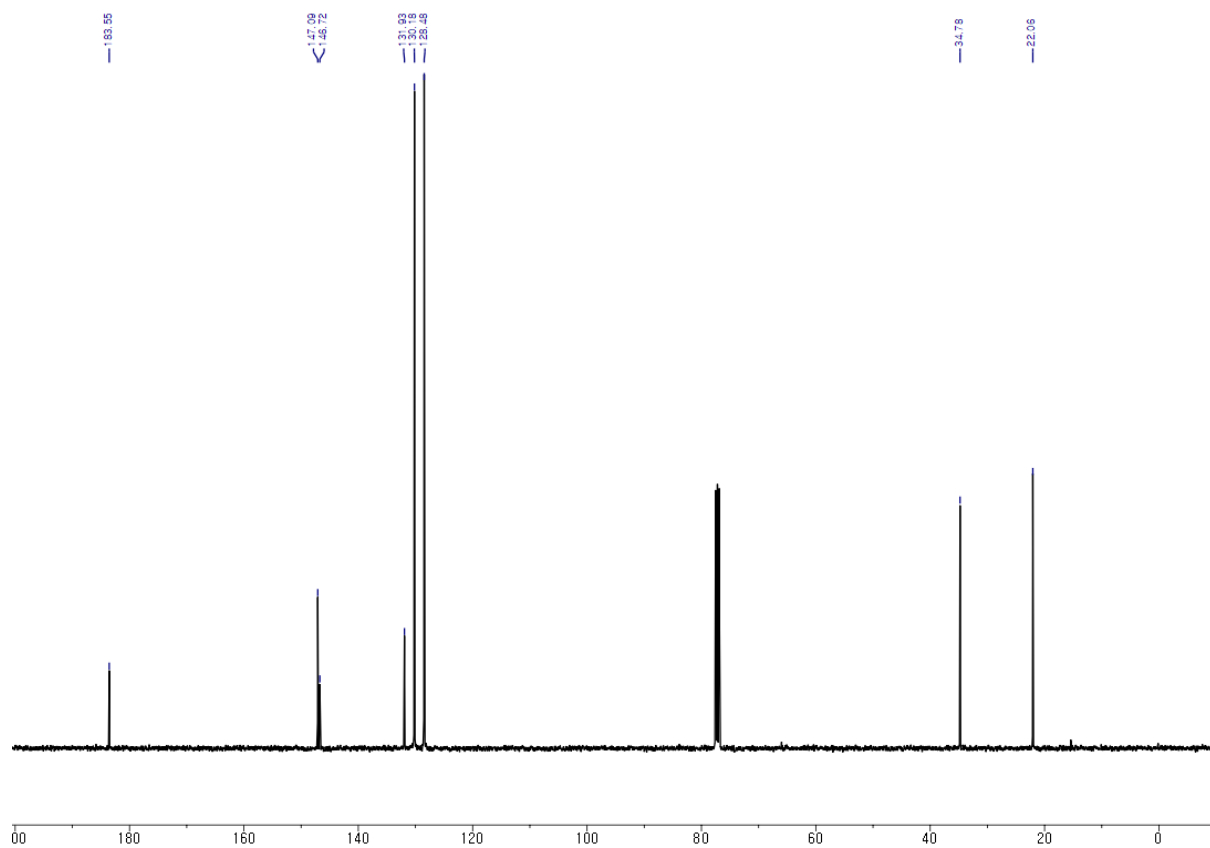

Figure S93.  $^{13}\text{C}$  NMR spectrum of **35** (101 MHz,  $\text{CDCl}_3$ , 300 K)

**Figure S94.**  $^1\text{H-NMR}$  spectrum of *N*-methylene proton regions (geminal coupling) of 6-membered complex, **18**

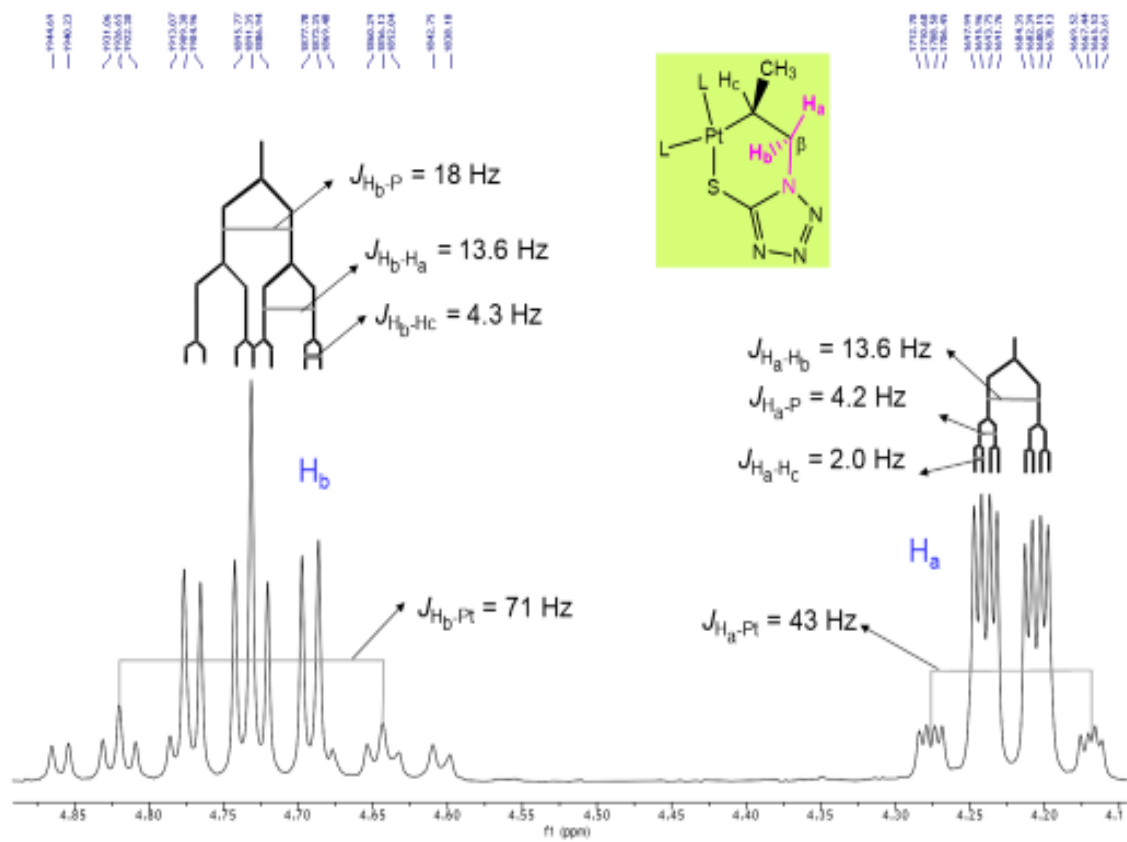

**Figure S95.**  $^1\text{H}$ -NMR spectra of methyl signal of 6-membered complexes, **18** (the below, A is a normal  $^1\text{H}$ -NMR. The above, B is a phosphorus decoupled spectrum)

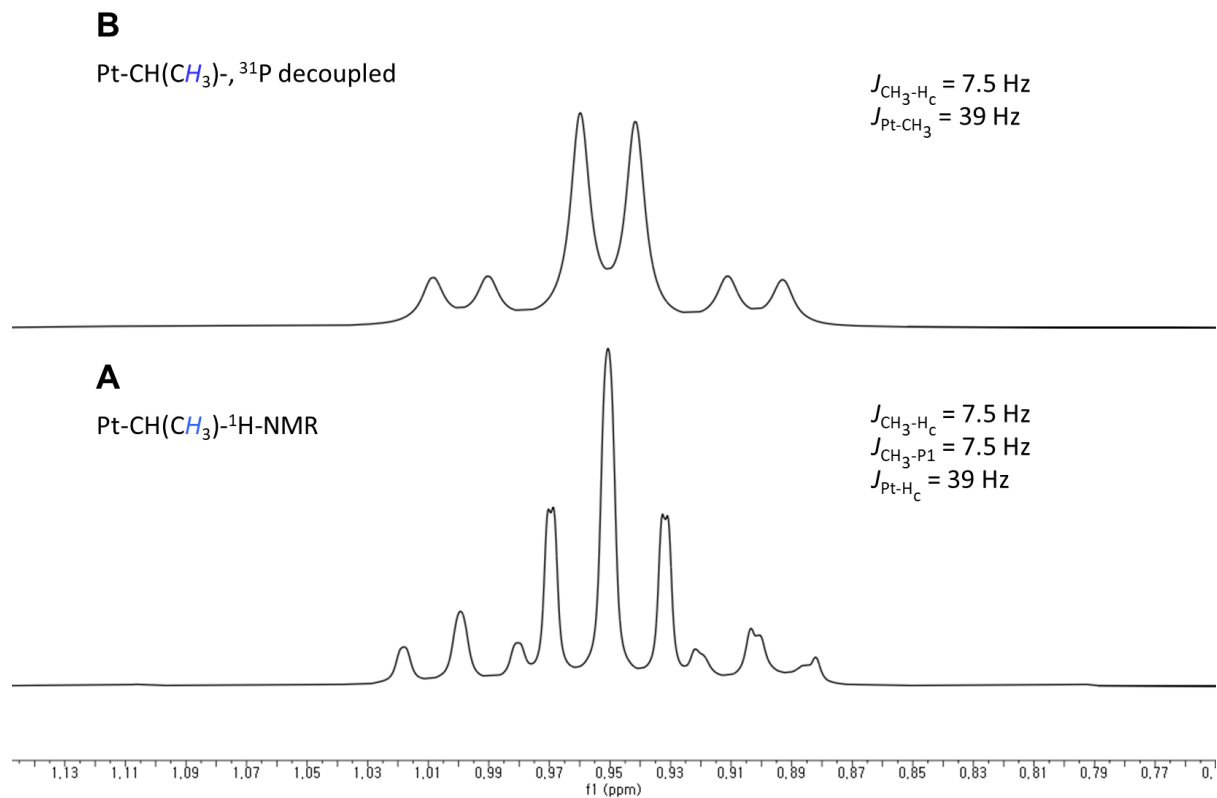

**Figure S96** The Pt(II) Hydride region in the variable  $^1\text{H-NMR}$  (400 MHz) spectra of complex **16**.

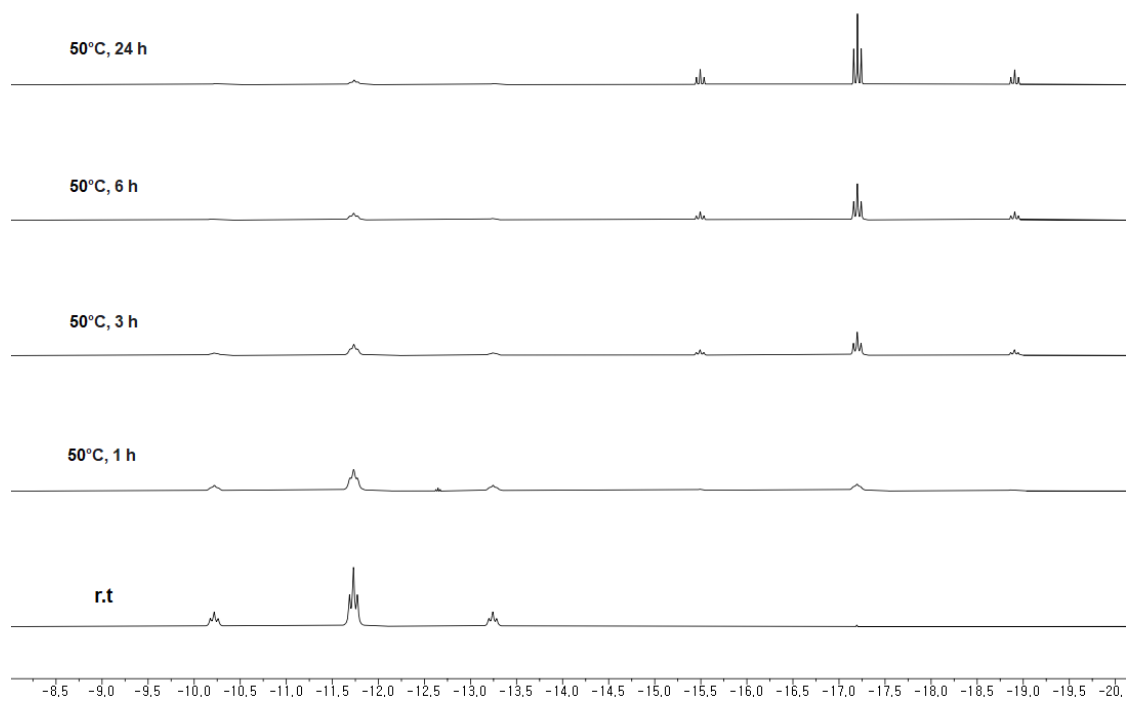

Supplement: d4nj01429d1.pdf [file d4nj01429d1.pdf]
